# Supplementary material for: The Transcriptome of Lutzomyia longipalpis (Diptera: Psychodidae) Male Reproductive Organs
Source: PLoS One. 2012 Apr 5;7(4):e34495. doi: 10.1371/journal.pone.0034495 (PMC3320635; doi:10.1371/journal.pone.0034495)
Supplement: Table S1 — Best BLASTn results from the comparison between L. longipalpis EST database and the L. longipalpis cDNA library of male reproductive organs. (XLS) [file pone.0034495.s001.xls]

## Sheet: Table S1
Table S1. Best BLASTn results from the comparison between L. longipalpis EST database and the L. Longipalpis cDNA library of male reproductive organs.
Cluster Name	Program	Database	Hit Description	Accession number	E-value	Score	Query Frame	Cluster Length	Reads	GC Content
RAAP028001A02.b	blastn	dbESTs_Llongipalpis.fasta	AM096970 Lutzomyia longipalpis Jacobina whole fly Lutzomyia longipalpis cDNA clone NSFM-40a07, mRNA sequence	AM096970	1e-49	194	1	182	1	26%
RAAP028001A05.b	blastn	dbESTs_Llongipalpis.fasta	LJGDIL10_H12 Adult female Lutzomyia longipalpis midgut library post blood meal digestion containing Leishmania chagasi Lutzomyia longipalpis cDNA, mRNA sequence	EW994235	0	866	1	544	4	44%
RAAP028001B02.b	blastn	dbESTs_Llongipalpis.fasta	AM097846 Lutzomyia longipalpis Jacobina whole fly Lutzomyia longipalpis cDNA clone NSFM-60e09, mRNA sequence	AM097846	2e-30	133	1	949	1	23%
RAAP028001B04.b	blastn	dbESTs_Llongipalpis.fasta	AM093408 Lutzomyia longipalpis Jacobina whole fly Lutzomyia longipalpis cDNA clone NSFM-94d04, mRNA sequence	AM093408	1e-28	125	1	232	1	33%
RAAP028001C04.b	blastn	dbESTs_Llongipalpis.fasta	LJGDIM27_D07 Adult female Lutzomyia longipalpis midgut library post blood meal digestion containing Leishmania chagasi Lutzomyia longipalpis cDNA, mRNA sequence	EW993540	5e-70	264	1	603	1	23%
RAAP028001C05.b	blastn	dbESTs_Llongipalpis.fasta	AM090223 Lutzomyia longipalpis Jacobina whole fly Lutzomyia longipalpis cDNA clone NSFM-22a09, mRNA sequence	AM090223	1e-24	111	1	197	1	26%
RAAP028001C09.b	blastn	dbESTs_Llongipalpis.fasta	LJGDM29_C01 Adult female Lutzomyia longipalpis midgut library post blood meal digestion Lutzomyia longipalpis cDNA, mRNA sequence	EW992548	4e-24	109	1	141	1	27%
RAAP028001C10.b	blastn	dbESTs_Llongipalpis.fasta	LJGFIM29_D04 Adult female Lutzomyia longipalpis midgut library blood fed containing Leishmania chagasi Lutzomyia longipalpis cDNA, mRNA sequence	EW990642	9e-82	303	1	879	1	26%
RAAP028001D03.b	blastn	dbESTs_Llongipalpis.fasta	AM107613 Lutzomyia longipalpis Jacobina whole fly Lutzomyia longipalpis cDNA clone NSFM-90g06, mRNA sequence	AM107613	1e-114	410	1	693	1	36%
RAAP028001D04.b	blastn	dbESTs_Llongipalpis.fasta	LJGFM7_F03 Adult female Lutzomyia longipalpis midgut library blood fed Lutzomyia longipalpis cDNA, mRNA sequence	EW988229	8e-42	168	1	210	2	37%
RAAP028001D06.b	blastn	dbESTs_Llongipalpis.fasta	AM096970 Lutzomyia longipalpis Jacobina whole fly Lutzomyia longipalpis cDNA clone NSFM-40a07, mRNA sequence	AM096970	1e-58	224	1	201	1	35%
RAAP028001D07.b	blastn	dbESTs_Llongipalpis.fasta	LJGD-L3_H03 Adult female Lutzomyia longipalpis midgut library post blood meal digestion Lutzomyia longipalpis cDNA, mRNA sequence	EW991322	5e-55	212	1	177	1	37%
RAAP028001D08.b	blastn	dbESTs_Llongipalpis.fasta	AM108777 Lutzomyia longipalpis Jacobina whole fly Lutzomyia longipalpis cDNA clone NSFM-158f01, mRNA sequence	AM108777	1e-18	92	1	192	1	31%
RAAP028001D10.b	blastn	dbESTs_Llongipalpis.fasta	AM089608 Lutzomyia longipalpis Jacobina whole fly Lutzomyia longipalpis cDNA clone SFM-02c11, mRNA sequence	AM089608	0	710	1	670	1	46%
RAAP028001D11.b	blastn	dbESTs_Llongipalpis.fasta	AM107769 Lutzomyia longipalpis Jacobina whole fly Lutzomyia longipalpis cDNA clone NSFM-111f07, mRNA sequence	AM107769	0	652	1	380	1	41%
RAAP028001E08.b	blastn	dbESTs_Llongipalpis.fasta	AM107857 Lutzomyia longipalpis Jacobina whole fly Lutzomyia longipalpis cDNA clone NSFM-104e07, mRNA sequence	AM107857	6e-64	242	1	195	1	43%
RAAP028001E12.b	blastn	dbESTs_Llongipalpis.fasta	AM093920 Lutzomyia longipalpis Jacobina whole fly Lutzomyia longipalpis cDNA clone SFM-04g06, mRNA sequence	AM093920	0	809	1	724	1	39%
RAAP028001F03.b	blastn	dbESTs_Llongipalpis.fasta	LJGFS_P03_A02 Adult female Lutzomyia longipalpis midgut library blood fed Lutzomyia longipalpis cDNA, mRNA sequence	EW988923	5e-16	84	1	283	1	23%
RAAP028001F07.b	blastn	dbESTs_Llongipalpis.fasta	AM108574 Lutzomyia longipalpis Jacobina whole fly Lutzomyia longipalpis cDNA clone NSFM-42f01, mRNA sequence	AM108574	2e-35	147	1	128	1	39%
RAAP028001F11.b	blastn	dbESTs_Llongipalpis.fasta	AM090225 Lutzomyia longipalpis Jacobina whole fly Lutzomyia longipalpis cDNA clone NSFM-45g01, mRNA sequence	AM090225	5e-62	236	1	274	3	24%
RAAP028001G06.b	blastn	dbESTs_Llongipalpis.fasta	AM107243 Lutzomyia longipalpis Jacobina whole fly Lutzomyia longipalpis cDNA clone NSFM-37c07, mRNA sequence	AM107243	0	807	1	936	1	42%
RAAP028001G09.b	blastn	dbESTs_Llongipalpis.fasta	AM104199 Lutzomyia longipalpis Jacobina whole fly Lutzomyia longipalpis cDNA clone NSFM-51f08, mRNA sequence	AM104199	0	989	1	785	1	47%
RAAP028001H05.b	blastn	dbESTs_Llongipalpis.fasta	LJGFS_P01_B10 Adult female Lutzomyia longipalpis midgut library blood fed Lutzomyia longipalpis cDNA, mRNA sequence	EW988771	3e-38	157	1	181	1	37%
RAAP028001H06.b	blastn	dbESTs_Llongipalpis.fasta	LJGFIS33_C07 Adult female Lutzomyia longipalpis midgut library blood fed containing Leishmania chagasi Lutzomyia longipalpis cDNA, mRNA sequence	EW990968	0	985	1	715	1	40%
RAAP028001H09.b	blastn	dbESTs_Llongipalpis.fasta	LJGDIL5_G04 Adult female Lutzomyia longipalpis midgut library post blood meal digestion containing Leishmania chagasi Lutzomyia longipalpis cDNA, mRNA sequence	EW994533	4e-40	163	1	167	1	39%
RAAP028001H11.b	blastn	dbESTs_Llongipalpis.fasta	LJGUS_P04_G12 Adult female Lutzomyia longipalpis midgut library sugar fed Lutzomyia longipalpis cDNA, mRNA sequence	EW996670	7e-26	117	1	543	1	41%
RAAP028001H12.b	blastn	dbESTs_Llongipalpis.fasta	AM099099 Lutzomyia longipalpis Jacobina whole fly Lutzomyia longipalpis cDNA clone NSFM-15a06, mRNA sequence	AM099099	0	1124	1	719	1	47%
RAAPBAR001B06.g	blastn	dbESTs_Llongipalpis.fasta	LJGUM-P02_B04 Adult female Lutzomyia longipalpis midgut library sugar fed Lutzomyia longipalpis cDNA, mRNA sequence	EW996096	3e-84	309	1	194	1	28%
RAAPBAR001B07.g	blastn	dbESTs_Llongipalpis.fasta	AM094232 Lutzomyia longipalpis Jacobina whole fly Lutzomyia longipalpis cDNA clone NSFM-34b10, mRNA sequence	AM094232	7e-52	202	1	268	1	27%
RAAPBAR001B08.g	blastn	dbESTs_Llongipalpis.fasta	LJGUS_P04_F02 Adult female Lutzomyia longipalpis midgut library sugar fed Lutzomyia longipalpis cDNA, mRNA sequence	EW996649	7e-62	236	1	332	1	36%
RAAPBAR001C06.g	blastn	dbESTs_Llongipalpis.fasta	AM094300 Lutzomyia longipalpis Jacobina whole fly Lutzomyia longipalpis cDNA clone NSFM-59e11, mRNA sequence	AM094300	1e-127	452	1	237	1	47%
RAAPBAR001C07.g	blastn	dbESTs_Llongipalpis.fasta	AM098932 Lutzomyia longipalpis Jacobina whole fly Lutzomyia longipalpis cDNA clone NSFM-149b11, mRNA sequence	AM098932	4e-62	236	1	188	1	50%
RAAPBAR001D02.g	blastn	dbESTs_Llongipalpis.fasta	LJGUS_P04_F10 Adult female Lutzomyia longipalpis midgut library sugar fed Lutzomyia longipalpis cDNA, mRNA sequence	EW996657	1e-58	224	1	166	1	34%
RAAPBAR001D09.g	blastn	dbESTs_Llongipalpis.fasta	AM089594 Lutzomyia longipalpis Jacobina whole fly Lutzomyia longipalpis cDNA clone NSFM-41f04, mRNA sequence	AM089594	2e-76	283	1	205	1	29%
RAAPBAR001E02.g	blastn	dbESTs_Llongipalpis.fasta	AM091331 Lutzomyia longipalpis Jacobina whole fly Lutzomyia longipalpis cDNA clone NSFM-70b03, mRNA sequence	AM091331	1e-121	432	1	351	1	49%
RAAPBAR001E05.g	blastn	dbESTs_Llongipalpis.fasta	AM089485 Lutzomyia longipalpis Jacobina whole fly Lutzomyia longipalpis cDNA clone NSFM-110f08, mRNA sequence	AM089485	2e-41	167	1	148	1	30%
RAAPBAR001F05.g	blastn	dbESTs_Llongipalpis.fasta	AM106826 Lutzomyia longipalpis Jacobina whole fly Lutzomyia longipalpis cDNA clone NSFM-23f01, mRNA sequence	AM106826	1e-124	442	1	252	1	46%
RAAPBAR001F10.g	blastn	dbESTs_Llongipalpis.fasta	AM099238 Lutzomyia longipalpis Jacobina whole fly Lutzomyia longipalpis cDNA clone NSFM-12b03, mRNA sequence	AM099238	6e-47	184	1	101	1	57%
RAAPBAR001G11.g	blastn	dbESTs_Llongipalpis.fasta	LJGDM32_C04 Adult female Lutzomyia longipalpis midgut library post blood meal digestion Lutzomyia longipalpis cDNA, mRNA sequence	EW992815	5e-30	129	1	171	1	37%
RAAPBAR001G12.g	blastn	dbESTs_Llongipalpis.fasta	LJGUS_P01_G12 Adult female Lutzomyia longipalpis midgut library sugar fed Lutzomyia longipalpis cDNA, mRNA sequence	EW996396	4e-27	119	1	129	1	26%
RAAPBAR001H01.g	blastn	dbESTs_Llongipalpis.fasta	LJGFIM26_D05 Adult female Lutzomyia longipalpis midgut library blood fed containing Leishmania chagasi Lutzomyia longipalpis cDNA, mRNA sequence	EW990397	1e-68	258	1	220	1	38%
RAAPBAR002A02.g	blastn	dbESTs_Llongipalpis.fasta	AM090214 Lutzomyia longipalpis Jacobina whole fly Lutzomyia longipalpis cDNA clone SFM-03b12, mRNA sequence	AM090214	1e-106	387	1	1628	203	18%
RAAPBAR002A05.g	blastn	dbESTs_Llongipalpis.fasta	LJGDIM23_A05 Adult female Lutzomyia longipalpis midgut library post blood meal digestion containing Leishmania chagasi Lutzomyia longipalpis cDNA, mRNA sequence	EW993203	0	646	1	532	7	42%
RAAPBAR002A10.g	blastn	dbESTs_Llongipalpis.fasta	LJGFS_P01_B09 Adult female Lutzomyia longipalpis midgut library blood fed Lutzomyia longipalpis cDNA, mRNA sequence	EW988770	4e-84	309	1	225	4	32%
RAAPBAR002A12.g	blastn	dbESTs_Llongipalpis.fasta	AM106060 Lutzomyia longipalpis Jacobina whole fly Lutzomyia longipalpis cDNA clone NSFM-121f05, mRNA sequence	AM106060	0	1035	1	562	3	47%
RAAPBAR002B06.g	blastn	dbESTs_Llongipalpis.fasta	LJGFM-P03_A12 Adult female Lutzomyia longipalpis midgut library blood fed Lutzomyia longipalpis cDNA, mRNA sequence	EW988592	3e-78	289	1	227	136	33%
RAAPBAR002B07.g	blastn	dbESTs_Llongipalpis.fasta	LJGU-L-6_F03 Adult female Lutzomyia longipalpis midgut library sugar fed Lutzomyia longipalpis cDNA, mRNA sequence	EW995047	0	805	1	614	6	40%
RAAPBAR002B09.g	blastn	dbESTs_Llongipalpis.fasta	LJGFS_P01_E09 Adult female Lutzomyia longipalpis midgut library blood fed Lutzomyia longipalpis cDNA, mRNA sequence	EW988804	5e-64	242	1	165	19	32%
RAAPBAR002B10.g	blastn	dbESTs_Llongipalpis.fasta	LJGFS_P01_F04 Adult female Lutzomyia longipalpis midgut library blood fed Lutzomyia longipalpis cDNA, mRNA sequence	EW988810	2e-70	264	1	188	64	31%
RAAPBAR002B11.g	blastn	dbESTs_Llongipalpis.fasta	AM090213 Lutzomyia longipalpis Jacobina whole fly Lutzomyia longipalpis cDNA clone NSFM-34b05, mRNA sequence	AM090213	2e-63	242	1	520	2	15%
RAAPBAR002C01.g	blastn	dbESTs_Llongipalpis.fasta	AM095134 Lutzomyia longipalpis Jacobina whole fly Lutzomyia longipalpis cDNA clone NSFM-59c09, mRNA sequence	AM095134	0	692	1	432	1	49%
RAAPBAR002C02.g	blastn	dbESTs_Llongipalpis.fasta	LJGFM9_G01 Adult female Lutzomyia longipalpis midgut library blood fed Lutzomyia longipalpis cDNA, mRNA sequence	EW988374	1e-81	301	1	322	1	38%
RAAPBAR002C07.g	blastn	dbESTs_Llongipalpis.fasta	LJGUL-P01_D09 Adult female Lutzomyia longipalpis midgut library sugar fed Lutzomyia longipalpis cDNA, mRNA sequence	EW995299	1e-173	605	1	368	1	51%
RAAPBAR002C09.g	blastn	dbESTs_Llongipalpis.fasta	LJGU-M-6_D11 Adult female Lutzomyia longipalpis midgut library sugar fed Lutzomyia longipalpis cDNA, mRNA sequence	EW995709	0	811	1	997	5	34%
RAAPBAR002D02.g	blastn	dbESTs_Llongipalpis.fasta	LJGFS_P01_B09 Adult female Lutzomyia longipalpis midgut library blood fed Lutzomyia longipalpis cDNA, mRNA sequence	EW988770	4e-84	309	1	262	2	31%
RAAPBAR002D05.g	blastn	dbESTs_Llongipalpis.fasta	LJGFM-P03_A12 Adult female Lutzomyia longipalpis midgut library blood fed Lutzomyia longipalpis cDNA, mRNA sequence	EW988592	4e-78	289	1	245	51	32%
RAAPBAR002D07.g	blastn	dbESTs_Llongipalpis.fasta	LJGFM5_A12 Adult female Lutzomyia longipalpis midgut library blood fed Lutzomyia longipalpis cDNA, mRNA sequence	EW988003	2e-29	127	1	158	1	28%
RAAPBAR002D09.g	blastn	dbESTs_Llongipalpis.fasta	LJGDIM23_A10 Adult female Lutzomyia longipalpis midgut library post blood meal digestion containing Leishmania chagasi Lutzomyia longipalpis cDNA, mRNA sequence	EW993208	1e-141	498	1	282	1	37%
RAAPBAR002E01.g	blastn	dbESTs_Llongipalpis.fasta	AM103323 Lutzomyia longipalpis Jacobina whole fly Lutzomyia longipalpis cDNA clone NSFM-67b11, mRNA sequence	AM103323	1e-155	545	1	357	1	44%
RAAPBAR002E02.g	blastn	dbESTs_Llongipalpis.fasta	AM098932 Lutzomyia longipalpis Jacobina whole fly Lutzomyia longipalpis cDNA clone NSFM-149b11, mRNA sequence	AM098932	1e-117	420	1	399	1	48%
RAAPBAR002E04.g	blastn	dbESTs_Llongipalpis.fasta	AM105654 Lutzomyia longipalpis Jacobina whole fly Lutzomyia longipalpis cDNA clone NSFM-35e12, mRNA sequence	AM105654	1e-127	452	1	294	1	42%
RAAPBAR002E10.g	blastn	dbESTs_Llongipalpis.fasta	AM104512 Lutzomyia longipalpis Jacobina whole fly Lutzomyia longipalpis cDNA clone NSFM-30c08, mRNA sequence	AM104512	2e-84	311	1	433	1	39%
RAAPBAR002E11.g	blastn	dbESTs_Llongipalpis.fasta	LJGUM-P01_B08 Adult female Lutzomyia longipalpis midgut library sugar fed Lutzomyia longipalpis cDNA, mRNA sequence	EW996013	2e-82	303	1	249	20	31%
RAAPBAR002E12.g	blastn	dbESTs_Llongipalpis.fasta	LJGU-L-10_A03 Adult female Lutzomyia longipalpis midgut library sugar fed Lutzomyia longipalpis cDNA, mRNA sequence	EW994877	0	761	1	433	1	51%
RAAPBAR002F04.g	blastn	dbESTs_Llongipalpis.fasta	LJGD-L3_H03 Adult female Lutzomyia longipalpis midgut library post blood meal digestion Lutzomyia longipalpis cDNA, mRNA sequence	EW991322	2e-52	204	1	235	1	29%
RAAPBAR002F12.g	blastn	dbESTs_Llongipalpis.fasta	AM090213 Lutzomyia longipalpis Jacobina whole fly Lutzomyia longipalpis cDNA clone NSFM-34b05, mRNA sequence	AM090213	1e-124	444	1	426	1	21%
RAAPBAR002G02.g	blastn	dbESTs_Llongipalpis.fasta	AM104198 Lutzomyia longipalpis Jacobina whole fly Lutzomyia longipalpis cDNA clone NSFM-37g10, mRNA sequence	AM104198	5e-43	172	1	190	1	24%
RAAPBAR002G04.g	blastn	dbESTs_Llongipalpis.fasta	LJGUM-P04_A03 Adult female Lutzomyia longipalpis midgut library sugar fed Lutzomyia longipalpis cDNA, mRNA sequence	EW996229	5e-53	206	1	283	1	22%
RAAPBAR002G08.g	blastn	dbESTs_Llongipalpis.fasta	LJGFM-P03_E05 Adult female Lutzomyia longipalpis midgut library blood fed Lutzomyia longipalpis cDNA, mRNA sequence	EW988633	2e-80	297	1	281	54	28%
RAAPBAR002G09.g	blastn	dbESTs_Llongipalpis.fasta	AM109602 Lutzomyia longipalpis Jacobina whole fly Lutzomyia longipalpis cDNA clone NSFM-02f02, mRNA sequence	AM109602	0	1013	1	643	2	40%
RAAPBAR002G10.g	blastn	dbESTs_Llongipalpis.fasta	AM091302 Lutzomyia longipalpis Jacobina whole fly Lutzomyia longipalpis cDNA clone NSFM-20g05, mRNA sequence	AM091302	0	737	1	450	1	44%
RAAPBAR002G12.g	blastn	dbESTs_Llongipalpis.fasta	LJGDIS30_A11 Adult female Lutzomyia longipalpis midgut library post blood meal digestion containing Leishmania chagasi Lutzomyia longipalpis cDNA, mRNA sequence	EW993730	0	694	1	476	2	43%
RAAPBAR002H01.g	blastn	dbESTs_Llongipalpis.fasta	LJGU-L-10_B12 Adult female Lutzomyia longipalpis midgut library sugar fed Lutzomyia longipalpis cDNA, mRNA sequence	EW994892	5e-61	232	1	172	2	34%
RAAPBAR002H02.g	blastn	dbESTs_Llongipalpis.fasta	AM104069 Lutzomyia longipalpis Jacobina whole fly Lutzomyia longipalpis cDNA clone NSFM-106b12, mRNA sequence	AM104069	1e-153	541	1	409	1	40%
RAAPBAR002H03.g	blastn	dbESTs_Llongipalpis.fasta	LJGD-L3_H03 Adult female Lutzomyia longipalpis midgut library post blood meal digestion Lutzomyia longipalpis cDNA, mRNA sequence	EW991322	9e-66	248	1	180	1	34%
RAAPBAR002H06.g	blastn	dbESTs_Llongipalpis.fasta	LJGD-L3_H03 Adult female Lutzomyia longipalpis midgut library post blood meal digestion Lutzomyia longipalpis cDNA, mRNA sequence	EW991322	6e-55	212	1	217	25	30%
RAAPBAR002H08.g	blastn	dbESTs_Llongipalpis.fasta	AM105365 Lutzomyia longipalpis Jacobina whole fly Lutzomyia longipalpis cDNA clone NSFM-149d08, mRNA sequence	AM105365	0	924	1	545	1	53%
RAAPBAR002H11.g	blastn	dbESTs_Llongipalpis.fasta	LJGD-L8_D04 Adult female Lutzomyia longipalpis midgut library post blood meal digestion Lutzomyia longipalpis cDNA, mRNA sequence	EW991671	1e-163	573	1	325	1	53%
RAAPBAR003A08.g	blastn	dbESTs_Llongipalpis.fasta	LJGFS_P01_E09 Adult female Lutzomyia longipalpis midgut library blood fed Lutzomyia longipalpis cDNA, mRNA sequence	EW988804	3e-51	200	1	246	55	26%
RAAPBAR003B03.g	blastn	dbESTs_Llongipalpis.fasta	AM095519 Lutzomyia longipalpis Jacobina whole fly Lutzomyia longipalpis cDNA clone NSFM-76e11, mRNA sequence	AM095519	3e-42	170	1	298	1	47%
RAAPBAR003B09.g	blastn	dbESTs_Llongipalpis.fasta	LJGU-L-9_C05 Adult female Lutzomyia longipalpis midgut library sugar fed Lutzomyia longipalpis cDNA, mRNA sequence	EW995215	0	876	1	716	11	26%
RAAPBAR003B10.g	blastn	dbESTs_Llongipalpis.fasta	AM098610 Lutzomyia longipalpis Jacobina whole fly Lutzomyia longipalpis cDNA clone NSFM-60b12, mRNA sequence	AM098610	3e-62	238	1	559	7	24%
RAAPBAR003C02.g	blastn	dbESTs_Llongipalpis.fasta	AM098831 Lutzomyia longipalpis Jacobina whole fly Lutzomyia longipalpis cDNA clone NSFM-02f05, mRNA sequence	AM098831	1e-23	109	1	323	1	30%
RAAPBAR003C05.g	blastn	dbESTs_Llongipalpis.fasta	LJGDM27_A10 Adult female Lutzomyia longipalpis midgut library post blood meal digestion Lutzomyia longipalpis cDNA, mRNA sequence	EW992369	1e-143	507	1	386	1	38%
RAAPBAR003C06.g	blastn	dbESTs_Llongipalpis.fasta	LJGFM-P03_A12 Adult female Lutzomyia longipalpis midgut library blood fed Lutzomyia longipalpis cDNA, mRNA sequence	EW988592	1e-77	287	1	200	13	34%
RAAPBAR003C07.g	blastn	dbESTs_Llongipalpis.fasta	LJGDM27_A10 Adult female Lutzomyia longipalpis midgut library post blood meal digestion Lutzomyia longipalpis cDNA, mRNA sequence	EW992369	1e-130	462	1	434	1	37%
RAAPBAR003C08.g	blastn	dbESTs_Llongipalpis.fasta	AM089046 Lutzomyia longipalpis Jacobina whole fly Lutzomyia longipalpis cDNA clone NSFM-47d08, mRNA sequence	AM089046	0	1431	1	1411	10	30%
RAAPBAR003C12.g	blastn	dbESTs_Llongipalpis.fasta	AM102681 Lutzomyia longipalpis Jacobina whole fly Lutzomyia longipalpis cDNA clone NSFM-38f11, mRNA sequence	AM102681	3e-74	278	1	512	2	26%
RAAPBAR003D03.g	blastn	dbESTs_Llongipalpis.fasta	LJGD-L3_H03 Adult female Lutzomyia longipalpis midgut library post blood meal digestion Lutzomyia longipalpis cDNA, mRNA sequence	EW991322	1e-67	254	1	170	1	34%
RAAPBAR003D07.g	blastn	dbESTs_Llongipalpis.fasta	AM104730 Lutzomyia longipalpis Jacobina whole fly Lutzomyia longipalpis cDNA clone NSFM-20e02, mRNA sequence	AM104730	0	688	1	513	1	50%
RAAPBAR003D09.g	blastn	dbESTs_Llongipalpis.fasta	AM100972 Lutzomyia longipalpis Jacobina whole fly Lutzomyia longipalpis cDNA clone NSFM-164b03, mRNA sequence	AM100972	1e-175	613	1	512	2	34%
RAAPBAR003E01.g	blastn	dbESTs_Llongipalpis.fasta	AM091526 Lutzomyia longipalpis Jacobina whole fly Lutzomyia longipalpis cDNA clone NSFM-146b09, mRNA sequence	AM091526	2e-13	76	1	508	1	35%
RAAPBAR003E02.g	blastn	dbESTs_Llongipalpis.fasta	AM100581 Lutzomyia longipalpis Jacobina whole fly Lutzomyia longipalpis cDNA clone NSFM-121a07, mRNA sequence	AM100581	1e-148	523	1	969	9	23%
RAAPBAR003E08.g	blastn	dbESTs_Llongipalpis.fasta	AM100580 Lutzomyia longipalpis Jacobina whole fly Lutzomyia longipalpis cDNA clone NSFM-149b12, mRNA sequence	AM100580	2e-33	141	1	217	1	19%
RAAPBAR003E10.g	blastn	dbESTs_Llongipalpis.fasta	LJGD-L3_H03 Adult female Lutzomyia longipalpis midgut library post blood meal digestion Lutzomyia longipalpis cDNA, mRNA sequence	EW991322	5e-74	276	1	220	1	28%
RAAPBAR003E12.g	blastn	dbESTs_Llongipalpis.fasta	AM093468 Lutzomyia longipalpis Jacobina whole fly Lutzomyia longipalpis cDNA clone NSFM-35a01, mRNA sequence	AM093468	6e-19	94	1	336	1	36%
RAAPBAR003F04.g	blastn	dbESTs_Llongipalpis.fasta	AM102820 Lutzomyia longipalpis Jacobina whole fly Lutzomyia longipalpis cDNA clone NSFM-51e04, mRNA sequence	AM102820	0	724	1	422	1	44%
RAAPBAR003F12.g	blastn	dbESTs_Llongipalpis.fasta	AM092908 Lutzomyia longipalpis Jacobina whole fly Lutzomyia longipalpis cDNA clone NSFM-100a07, mRNA sequence	AM092908	0	912	1	549	3	49%
RAAPBAR003G02.g	blastn	dbESTs_Llongipalpis.fasta	AM107025 Lutzomyia longipalpis Jacobina whole fly Lutzomyia longipalpis cDNA clone NSFM-137c01, mRNA sequence	AM107025	0	692	1	436	1	45%
RAAPBAR003G03.g	blastn	dbESTs_Llongipalpis.fasta	LJGFIM24_E06 Adult female Lutzomyia longipalpis midgut library blood fed containing Leishmania chagasi Lutzomyia longipalpis cDNA, mRNA sequence	EW990241	6e-09	60	1	232	1	21%
RAAPBAR003G10.g	blastn	dbESTs_Llongipalpis.fasta	LJGUM-P02_G11 Adult female Lutzomyia longipalpis midgut library sugar fed Lutzomyia longipalpis cDNA, mRNA sequence	EW996153	1e-100	365	1	323	1	24%
RAAPBAR003H03.g	blastn	dbESTs_Llongipalpis.fasta	LJGD-L3_E03 Adult female Lutzomyia longipalpis midgut library post blood meal digestion Lutzomyia longipalpis cDNA, mRNA sequence	EW991299	2e-26	119	1	482	4	16%
RAAPBAR003H04.g	blastn	dbESTs_Llongipalpis.fasta	AM090762 Lutzomyia longipalpis Jacobina whole fly Lutzomyia longipalpis cDNA clone NSFM-141a06, mRNA sequence	AM090762	0	795	1	598	20	41%
RAAPBAR003H09.g	blastn	dbESTs_Llongipalpis.fasta	AM090222 Lutzomyia longipalpis Jacobina whole fly Lutzomyia longipalpis cDNA clone NSFM-23e09, mRNA sequence	AM090222	3e-30	131	1	382	6	24%
RAAPBAR003H10.g	blastn	dbESTs_Llongipalpis.fasta	LJGUS_P01_G12 Adult female Lutzomyia longipalpis midgut library sugar fed Lutzomyia longipalpis cDNA, mRNA sequence	EW996396	1e-80	297	1	186	3	35%
RAAPBAR003H11.g	blastn	dbESTs_Llongipalpis.fasta	LJGD-L3_H03 Adult female Lutzomyia longipalpis midgut library post blood meal digestion Lutzomyia longipalpis cDNA, mRNA sequence	EW991322	2e-58	224	1	237	2	28%
RAAPBAR004A06.g	blastn	dbESTs_Llongipalpis.fasta	LJGUM-P01_B08 Adult female Lutzomyia longipalpis midgut library sugar fed Lutzomyia longipalpis cDNA, mRNA sequence	EW996013	2e-79	293	1	182	1	37%
RAAPBAR004A10.g	blastn	dbESTs_Llongipalpis.fasta	LJGF-L-6_H09 Adult female Lutzomyia longipalpis midgut library blood fed Lutzomyia longipalpis cDNA, mRNA sequence	EW987666	1e-24	111	1	148	1	36%
RAAPBAR004B03.g	blastn	dbESTs_Llongipalpis.fasta	LJGF-L-6_B03 Adult female Lutzomyia longipalpis midgut library blood fed Lutzomyia longipalpis cDNA, mRNA sequence	EW987619	5e-55	212	1	189	1	34%
RAAPBAR004B06.g	blastn	dbESTs_Llongipalpis.fasta	LJGU-L-6_C05 Adult female Lutzomyia longipalpis midgut library sugar fed Lutzomyia longipalpis cDNA, mRNA sequence	EW995022	1e-156	549	1	392	2	38%
RAAPBAR004B09.g	blastn	dbESTs_Llongipalpis.fasta	AM094284 Lutzomyia longipalpis Jacobina whole fly Lutzomyia longipalpis cDNA clone NSFM-126f07, mRNA sequence	AM094284	1e-132	470	1	304	1	42%
RAAPBAR004C03.g	blastn	dbESTs_Llongipalpis.fasta	AM091890 Lutzomyia longipalpis Jacobina whole fly Lutzomyia longipalpis cDNA clone NSFM-37g01, mRNA sequence	AM091890	4e-44	176	1	262	1	25%
RAAPBAR004C04.g	blastn	dbESTs_Llongipalpis.fasta	AM091963 Lutzomyia longipalpis Jacobina whole fly Lutzomyia longipalpis cDNA clone NSFM-50d08, mRNA sequence	AM091963	0	688	1	769	9	44%
RAAPBAR004C08.g	blastn	dbESTs_Llongipalpis.fasta	LJGDIS31_G09 Adult female Lutzomyia longipalpis midgut library post blood meal digestion containing Leishmania chagasi Lutzomyia longipalpis cDNA, mRNA sequence	EW993883	0	771	1	758	10	35%
RAAPBAR004C11.g	blastn	dbESTs_Llongipalpis.fasta	LJGDIM23_H11 Adult female Lutzomyia longipalpis midgut library post blood meal digestion containing Leishmania chagasi Lutzomyia longipalpis cDNA, mRNA sequence	EW993278	4e-44	176	1	233	1	23%
RAAPBAR004D02.g	blastn	dbESTs_Llongipalpis.fasta	AM099895 Lutzomyia longipalpis Jacobina whole fly Lutzomyia longipalpis cDNA clone NSFM-45e08, mRNA sequence	AM099895	9e-59	226	1	442	1	25%
RAAPBAR004D06.g	blastn	dbESTs_Llongipalpis.fasta	LJGF-L-8_D03 Adult female Lutzomyia longipalpis midgut library blood fed Lutzomyia longipalpis cDNA, mRNA sequence	EW987774	0	726	1	542	5	46%
RAAPBAR004D11.g	blastn	dbESTs_Llongipalpis.fasta	LJGD-L7_D12 Adult female Lutzomyia longipalpis midgut library post blood meal digestion Lutzomyia longipalpis cDNA, mRNA sequence	EW991594	0	854	1	540	2	47%
RAAPBAR004D12.g	blastn	dbESTs_Llongipalpis.fasta	AM088857 Lutzomyia longipalpis Jacobina whole fly Lutzomyia longipalpis cDNA clone NSFM-112a03, mRNA sequence	AM088857	3e-07	56	1	645	2	28%
RAAPBAR004E01.g	blastn	dbESTs_Llongipalpis.fasta	AM109178 Lutzomyia longipalpis Jacobina whole fly Lutzomyia longipalpis cDNA clone NSFM-15d01, mRNA sequence	AM109178	1e-171	601	1	338	1	49%
RAAPBAR004E06.g	blastn	dbESTs_Llongipalpis.fasta	AM097724 Lutzomyia longipalpis Jacobina whole fly Lutzomyia longipalpis cDNA clone NSFM-83g05, mRNA sequence	AM097724	1e-154	541	1	280	1	48%
RAAPBAR004E07.g	blastn	dbESTs_Llongipalpis.fasta	AM097390 Lutzomyia longipalpis Jacobina whole fly Lutzomyia longipalpis cDNA clone NSFM-27e08, mRNA sequence	AM097390	1e-170	597	1	396	3	27%
RAAPBAR004E08.g	blastn	dbESTs_Llongipalpis.fasta	AM098798 Lutzomyia longipalpis Jacobina whole fly Lutzomyia longipalpis cDNA clone NSFM-127e06, mRNA sequence	AM098798	5e-53	206	1	299	1	29%
RAAPBAR004E09.g	blastn	dbESTs_Llongipalpis.fasta	LJGFIM24_C11 Adult female Lutzomyia longipalpis midgut library blood fed containing Leishmania chagasi Lutzomyia longipalpis cDNA, mRNA sequence	EW990223	0	985	1	612	3	40%
RAAPBAR004E11.g	blastn	dbESTs_Llongipalpis.fasta	AM108706 Lutzomyia longipalpis Jacobina whole fly Lutzomyia longipalpis cDNA clone NSFM-70d02, mRNA sequence	AM108706	1e-109	392	1	364	1	27%
RAAPBAR004E12.g	blastn	dbESTs_Llongipalpis.fasta	LJGU-M-6_A07 Adult female Lutzomyia longipalpis midgut library sugar fed Lutzomyia longipalpis cDNA, mRNA sequence	EW995679	4e-59	226	1	215	1	32%
RAAPBAR004F02.g	blastn	dbESTs_Llongipalpis.fasta	AM093782 Lutzomyia longipalpis Jacobina whole fly Lutzomyia longipalpis cDNA clone NSFM-162a08, mRNA sequence	AM093782	4e-62	236	1	190	1	41%
RAAPBAR004F07.g	blastn	dbESTs_Llongipalpis.fasta	AM102498 Lutzomyia longipalpis Jacobina whole fly Lutzomyia longipalpis cDNA clone NSFM-32g04, mRNA sequence	AM102498	1e-165	579	1	310	1	51%
RAAPBAR004F10.g	blastn	dbESTs_Llongipalpis.fasta	LJGD-L3_H03 Adult female Lutzomyia longipalpis midgut library post blood meal digestion Lutzomyia longipalpis cDNA, mRNA sequence	EW991322	2e-69	260	1	185	1	33%
RAAPBAR004F12.g	blastn	dbESTs_Llongipalpis.fasta	AM107479 Lutzomyia longipalpis Jacobina whole fly Lutzomyia longipalpis cDNA clone NSFM-147d12, mRNA sequence	AM107479	0	971	1	551	2	48%
RAAPBAR004G01.g	blastn	dbESTs_Llongipalpis.fasta	AM090225 Lutzomyia longipalpis Jacobina whole fly Lutzomyia longipalpis cDNA clone NSFM-45g01, mRNA sequence	AM090225	2e-86	317	1	265	1	27%
RAAPBAR004G04.g	blastn	dbESTs_Llongipalpis.fasta	AM095638 Lutzomyia longipalpis Jacobina whole fly Lutzomyia longipalpis cDNA clone NSFM-72g03, mRNA sequence	AM095638	0	634	1	802	5	39%
RAAPBAR004G08.g	blastn	dbESTs_Llongipalpis.fasta	AM095997 Lutzomyia longipalpis Jacobina whole fly Lutzomyia longipalpis cDNA clone NSFM-86f12, mRNA sequence	AM095997	1e-120	430	1	447	2	33%
RAAPBAR004G10.g	blastn	dbESTs_Llongipalpis.fasta	AM089665 Lutzomyia longipalpis Jacobina whole fly Lutzomyia longipalpis cDNA clone NSFM-58f06, mRNA sequence	AM089665	1e-116	416	1	312	1	52%
RAAPBAR004G11.g	blastn	dbESTs_Llongipalpis.fasta	AM109006 Lutzomyia longipalpis Jacobina whole fly Lutzomyia longipalpis cDNA clone NSFM-141a09, mRNA sequence	AM109006	2e-35	147	1	169	1	27%
RAAPBAR004G12.g	blastn	dbESTs_Llongipalpis.fasta	AM105533 Lutzomyia longipalpis Jacobina whole fly Lutzomyia longipalpis cDNA clone NSFM-20b02, mRNA sequence	AM105533	0	870	1	589	6	40%
RAAPBAR004H03.g	blastn	dbESTs_Llongipalpis.fasta	AM096526 Lutzomyia longipalpis Jacobina whole fly Lutzomyia longipalpis cDNA clone NSFM-68a08, mRNA sequence	AM096526	0	682	1	435	1	44%
RAAPBAR004H05.g	blastn	dbESTs_Llongipalpis.fasta	LJGUS_P04_G12 Adult female Lutzomyia longipalpis midgut library sugar fed Lutzomyia longipalpis cDNA, mRNA sequence	EW996670	2e-37	155	1	309	1	45%
RAAPBAR004H06.g	blastn	dbESTs_Llongipalpis.fasta	LJGF-L-8_H12 Adult female Lutzomyia longipalpis midgut library blood fed Lutzomyia longipalpis cDNA, mRNA sequence	EW987823	2e-25	115	1	316	2	31%
RAAPBAR004H08.g	blastn	dbESTs_Llongipalpis.fasta	LJGUM-P01_B08 Adult female Lutzomyia longipalpis midgut library sugar fed Lutzomyia longipalpis cDNA, mRNA sequence	EW996013	9e-82	301	1	240	3	32%
RAAPBAR004H11.g	blastn	dbESTs_Llongipalpis.fasta	AM107974 Lutzomyia longipalpis Jacobina whole fly Lutzomyia longipalpis cDNA clone NSFM-30c03, mRNA sequence	AM107974	3e-37	153	1	153	1	41%
RAAPBAR005A02.g	blastn	dbESTs_Llongipalpis.fasta	LJGDIM29_D04 Adult female Lutzomyia longipalpis midgut library post blood meal digestion containing Leishmania chagasi Lutzomyia longipalpis cDNA, mRNA sequence	EW993687	2e-78	291	1	453	1	27%
RAAPBAR005A07.g	blastn	dbESTs_Llongipalpis.fasta	AM097125 Lutzomyia longipalpis Jacobina whole fly Lutzomyia longipalpis cDNA clone NSFM-10c05, mRNA sequence	AM097125	1e-141	500	1	267	1	59%
RAAPBAR005B04.g	blastn	dbESTs_Llongipalpis.fasta	AM096952 Lutzomyia longipalpis Jacobina whole fly Lutzomyia longipalpis cDNA clone SFM-05g09, mRNA sequence	AM096952	2e-77	287	1	333	1	26%
RAAPBAR005C10.g	blastn	dbESTs_Llongipalpis.fasta	AM097783 Lutzomyia longipalpis Jacobina whole fly Lutzomyia longipalpis cDNA clone NSFM-138e02, mRNA sequence	AM097783	0	676	1	586	1	41%
RAAPBAR005D05.g	blastn	dbESTs_Llongipalpis.fasta	LJGD-L3_H03 Adult female Lutzomyia longipalpis midgut library post blood meal digestion Lutzomyia longipalpis cDNA, mRNA sequence	EW991322	5e-55	212	1	197	1	32%
RAAPBAR005D06.g	blastn	dbESTs_Llongipalpis.fasta	LJGD-L3_H03 Adult female Lutzomyia longipalpis midgut library post blood meal digestion Lutzomyia longipalpis cDNA, mRNA sequence	EW991322	6e-70	262	1	171	1	35%
RAAPBAR005D07.g	blastn	dbESTs_Llongipalpis.fasta	AM099418 Lutzomyia longipalpis Jacobina whole fly Lutzomyia longipalpis cDNA clone NSFM-122e01, mRNA sequence	AM099418	0	981	1	810	4	44%
RAAPBAR005D10.g	blastn	dbESTs_Llongipalpis.fasta	AM090870 Lutzomyia longipalpis Jacobina whole fly Lutzomyia longipalpis cDNA clone NSFM-121f07, mRNA sequence	AM090870	1e-122	436	1	345	1	33%
RAAPBAR005D12.g	blastn	dbESTs_Llongipalpis.fasta	LJGD-L3_H03 Adult female Lutzomyia longipalpis midgut library post blood meal digestion Lutzomyia longipalpis cDNA, mRNA sequence	EW991322	1e-40	165	1	204	1	31%
RAAPBAR005E02.g	blastn	dbESTs_Llongipalpis.fasta	LJGFIM29_B09 Adult female Lutzomyia longipalpis midgut library blood fed containing Leishmania chagasi Lutzomyia longipalpis cDNA, mRNA sequence	EW990625	0	690	1	500	2	45%
RAAPBAR005E03.g	blastn	dbESTs_Llongipalpis.fasta	AM091821 Lutzomyia longipalpis Jacobina whole fly Lutzomyia longipalpis cDNA clone NSFM-135a05, mRNA sequence	AM091821	0	737	1	514	1	47%
RAAPBAR005E04.g	blastn	dbESTs_Llongipalpis.fasta	AM109154 Lutzomyia longipalpis Jacobina whole fly Lutzomyia longipalpis cDNA clone NSFM-05c07, mRNA sequence	AM109154	3e-68	256	1	167	1	17%
RAAPBAR005E05.g	blastn	dbESTs_Llongipalpis.fasta	AM107809 Lutzomyia longipalpis Jacobina whole fly Lutzomyia longipalpis cDNA clone NSFM-89d01, mRNA sequence	AM107809	1e-113	404	1	219	1	49%
RAAPBAR005E10.g	blastn	dbESTs_Llongipalpis.fasta	AM107665 Lutzomyia longipalpis Jacobina whole fly Lutzomyia longipalpis cDNA clone NSFM-38b08, mRNA sequence	AM107665	0	920	1	613	1	51%
RAAPBAR005F04.g	blastn	dbESTs_Llongipalpis.fasta	LJGFIM23_A02 Adult female Lutzomyia longipalpis midgut library blood fed containing Leishmania chagasi Lutzomyia longipalpis cDNA, mRNA sequence	EW990110	1e-135	482	1	513	1	40%
RAAPBAR005G02.g	blastn	dbESTs_Llongipalpis.fasta	AM106630 Lutzomyia longipalpis Jacobina whole fly Lutzomyia longipalpis cDNA clone NSFM-81h02, mRNA sequence	AM106630	1e-101	367	1	196	1	50%
RAAPBAR005G06.g	blastn	dbESTs_Llongipalpis.fasta	LJGDM30_H06 Adult female Lutzomyia longipalpis midgut library post blood meal digestion Lutzomyia longipalpis cDNA, mRNA sequence	EW992698	1e-171	601	1	398	3	40%
RAAPBAR005H01.g	blastn	dbESTs_Llongipalpis.fasta	LJGFIL5_F06 Adult female Lutzomyia longipalpis midgut library blood fed containing Leishmania chagasi Lutzomyia longipalpis cDNA, mRNA sequence	EW989527	1e-179	624	1	358	1	48%
RAAPBAR005H05.g	blastn	dbESTs_Llongipalpis.fasta	LJGFIL3_H07 Adult female Lutzomyia longipalpis midgut library blood fed containing Leishmania chagasi Lutzomyia longipalpis cDNA, mRNA sequence	EW989403	1e-174	611	1	361	1	50%
RAAPBAR005H08.g	blastn	dbESTs_Llongipalpis.fasta	LJGD-L9_F09 Adult female Lutzomyia longipalpis midgut library post blood meal digestion Lutzomyia longipalpis cDNA, mRNA sequence	EW991770	1e-06	52	1	213	1	22%
RAAPBAR005H09.g	blastn	dbESTs_Llongipalpis.fasta	AM093436 Lutzomyia longipalpis Jacobina whole fly Lutzomyia longipalpis cDNA clone NSFM-121c01, mRNA sequence	AM093436	1e-159	559	1	360	1	36%
RAAPBAR005H10.g	blastn	dbESTs_Llongipalpis.fasta	LJGFS_P02_A01 Adult female Lutzomyia longipalpis midgut library blood fed Lutzomyia longipalpis cDNA, mRNA sequence	EW988840	0	692	1	620	1	36%
RAAPBAR006A02.g	blastn	dbESTs_Llongipalpis.fasta	LJGU-M-6_F11 Adult female Lutzomyia longipalpis midgut library sugar fed Lutzomyia longipalpis cDNA, mRNA sequence	EW995729	1e-179	626	1	468	1	27%
RAAPBAR006A03.g	blastn	dbESTs_Llongipalpis.fasta	AM090561 Lutzomyia longipalpis Jacobina whole fly Lutzomyia longipalpis cDNA clone NSFM-159a12, mRNA sequence	AM090561	8e-54	208	1	182	1	34%
RAAPBAR006A04.g	blastn	dbESTs_Llongipalpis.fasta	AM105409 Lutzomyia longipalpis Jacobina whole fly Lutzomyia longipalpis cDNA clone NSFM-41e01, mRNA sequence	AM105409	8e-79	291	1	204	1	32%
RAAPBAR006A05.g	blastn	dbESTs_Llongipalpis.fasta	AM090223 Lutzomyia longipalpis Jacobina whole fly Lutzomyia longipalpis cDNA clone NSFM-22a09, mRNA sequence	AM090223	4e-75	280	1	272	1	34%
RAAPBAR006A08.g	blastn	dbESTs_Llongipalpis.fasta	AM108328 Lutzomyia longipalpis Jacobina whole fly Lutzomyia longipalpis cDNA clone NSFM-50d10, mRNA sequence	AM108328	1e-134	478	1	371	1	32%
RAAPBAR006A09.g	blastn	dbESTs_Llongipalpis.fasta	AM101155 Lutzomyia longipalpis Jacobina whole fly Lutzomyia longipalpis cDNA clone NSFM-154f08, mRNA sequence	AM101155	1e-178	624	1	580	1	47%
RAAPBAR006B05.g	blastn	dbESTs_Llongipalpis.fasta	LJGD-L3_H03 Adult female Lutzomyia longipalpis midgut library post blood meal digestion Lutzomyia longipalpis cDNA, mRNA sequence	EW991322	7e-64	242	1	216	1	31%
RAAPBAR006B11.g	blastn	dbESTs_Llongipalpis.fasta	LJGD-L2_E10 Adult female Lutzomyia longipalpis midgut library post blood meal digestion Lutzomyia longipalpis cDNA, mRNA sequence	EW991227	1e-179	626	1	384	1	45%
RAAPBAR006C06.g	blastn	dbESTs_Llongipalpis.fasta	AM102741 Lutzomyia longipalpis Jacobina whole fly Lutzomyia longipalpis cDNA clone NSFM-148a04, mRNA sequence	AM102741	1e-144	507	1	271	1	50%
RAAPBAR006C08.g	blastn	dbESTs_Llongipalpis.fasta	AM095288 Lutzomyia longipalpis Jacobina whole fly Lutzomyia longipalpis cDNA clone NSFM-120f11, mRNA sequence	AM095288	4e-07	54	1	255	1	16%
RAAPBAR006C09.g	blastn	dbESTs_Llongipalpis.fasta	AM101875 Lutzomyia longipalpis Jacobina whole fly Lutzomyia longipalpis cDNA clone NSFM-162f12, mRNA sequence	AM101875	5e-30	129	1	158	1	20%
RAAPBAR006C10.g	blastn	dbESTs_Llongipalpis.fasta	AM092376 Lutzomyia longipalpis Jacobina whole fly Lutzomyia longipalpis cDNA clone NSFM-85f08, mRNA sequence	AM092376	0	846	1	556	1	41%
RAAPBAR006D01.g	blastn	dbESTs_Llongipalpis.fasta	LJGFS_P01_B09 Adult female Lutzomyia longipalpis midgut library blood fed Lutzomyia longipalpis cDNA, mRNA sequence	EW988770	1e-81	301	1	249	1	33%
RAAPBAR006E01.g	blastn	dbESTs_Llongipalpis.fasta	AM100084 Lutzomyia longipalpis Jacobina whole fly Lutzomyia longipalpis cDNA clone NSFM-98a09, mRNA sequence	AM100084	2e-48	190	1	156	1	19%
RAAPBAR006E09.g	blastn	dbESTs_Llongipalpis.fasta	LJGUM-P01_B08 Adult female Lutzomyia longipalpis midgut library sugar fed Lutzomyia longipalpis cDNA, mRNA sequence	EW996013	2e-82	303	1	223	2	37%
RAAPBAR006F01.g	blastn	dbESTs_Llongipalpis.fasta	AM091158 Lutzomyia longipalpis Jacobina whole fly Lutzomyia longipalpis cDNA clone NSFM-149b09, mRNA sequence	AM091158	2e-20	98	1	205	1	34%
RAAPBAR006F03.g	blastn	dbESTs_Llongipalpis.fasta	LJGUM-P01_B08 Adult female Lutzomyia longipalpis midgut library sugar fed Lutzomyia longipalpis cDNA, mRNA sequence	EW996013	7e-82	301	1	187	1	41%
RAAPBAR006G04.g	blastn	dbESTs_Llongipalpis.fasta	LJGDIL1_A12 Adult female Lutzomyia longipalpis midgut library post blood meal digestion containing Leishmania chagasi Lutzomyia longipalpis cDNA, mRNA sequence	EW994076	1e-109	394	1	435	1	27%
RAAPBAR006H02.g	blastn	dbESTs_Llongipalpis.fasta	LJGD-L3_H03 Adult female Lutzomyia longipalpis midgut library post blood meal digestion Lutzomyia longipalpis cDNA, mRNA sequence	EW991322	2e-52	204	1	256	2	26%
RAAPBAR006H10.g	blastn	dbESTs_Llongipalpis.fasta	AM090219 Lutzomyia longipalpis Jacobina whole fly Lutzomyia longipalpis cDNA clone SFM-02h03, mRNA sequence	AM090219	6e-33	139	1	189	1	25%
RAAPBAR006H12.g	blastn	dbESTs_Llongipalpis.fasta	AM093516 Lutzomyia longipalpis Jacobina whole fly Lutzomyia longipalpis cDNA clone NSFM-13a07, mRNA sequence	AM093516	1e-124	442	1	289	1	36%
RAAPBAR007A02.g	blastn	dbESTs_Llongipalpis.fasta	AM099578 Lutzomyia longipalpis Jacobina whole fly Lutzomyia longipalpis cDNA clone NSFM-113e12, mRNA sequence	AM099578	2e-62	238	1	367	1	22%
RAAPBAR007A10.g	blastn	dbESTs_Llongipalpis.fasta	LJGFIS32_F04 Adult female Lutzomyia longipalpis midgut library blood fed containing Leishmania chagasi Lutzomyia longipalpis cDNA, mRNA sequence	EW990913	2e-30	131	1	272	1	19%
RAAPBAR007B01.g	blastn	dbESTs_Llongipalpis.fasta	AM093826 Lutzomyia longipalpis Jacobina whole fly Lutzomyia longipalpis cDNA clone NSFM-162d06, mRNA sequence	AM093826	1e-124	442	1	408	1	36%
RAAPBAR007B02.g	blastn	dbESTs_Llongipalpis.fasta	AM091945 Lutzomyia longipalpis Jacobina whole fly Lutzomyia longipalpis cDNA clone NSFM-155c05, mRNA sequence	AM091945	0	1001	1	755	1	41%
RAAPBAR007B03.g	blastn	dbESTs_Llongipalpis.fasta	LJGDIL3_A02 Adult female Lutzomyia longipalpis midgut library post blood meal digestion containing Leishmania chagasi Lutzomyia longipalpis cDNA, mRNA sequence	EW994316	0	896	1	484	1	52%
RAAPBAR007B10.g	blastn	dbESTs_Llongipalpis.fasta	LJGU-M-9_B08 Adult female Lutzomyia longipalpis midgut library sugar fed Lutzomyia longipalpis cDNA, mRNA sequence	EW995932	1e-119	424	1	233	1	48%
RAAPBAR007C04.g	blastn	dbESTs_Llongipalpis.fasta	AM094829 Lutzomyia longipalpis Jacobina whole fly Lutzomyia longipalpis cDNA clone NSFM-72e11, mRNA sequence	AM094829	0	920	1	719	1	46%
RAAPBAR007C09.g	blastn	dbESTs_Llongipalpis.fasta	LJGUL-P03_F12 Adult female Lutzomyia longipalpis midgut library sugar fed Lutzomyia longipalpis cDNA, mRNA sequence	EW995463	6e-45	178	1	167	1	32%
RAAPBAR007C12.g	blastn	dbESTs_Llongipalpis.fasta	LJGD-L3_H03 Adult female Lutzomyia longipalpis midgut library post blood meal digestion Lutzomyia longipalpis cDNA, mRNA sequence	EW991322	2e-54	210	1	177	1	32%
RAAPBAR007D01.g	blastn	dbESTs_Llongipalpis.fasta	LJGDM31_G11 Adult female Lutzomyia longipalpis midgut library post blood meal digestion Lutzomyia longipalpis cDNA, mRNA sequence	EW992778	2e-09	62	1	319	1	39%
RAAPBAR007D03.g	blastn	dbESTs_Llongipalpis.fasta	AM095518 Lutzomyia longipalpis Jacobina whole fly Lutzomyia longipalpis cDNA clone NSFM-76e11, mRNA sequence	AM095518	9e-68	256	1	394	1	46%
RAAPBAR007E01.g	blastn	dbESTs_Llongipalpis.fasta	AM097006 Lutzomyia longipalpis Jacobina whole fly Lutzomyia longipalpis cDNA clone NSFM-82g07, mRNA sequence	AM097006	1e-48	192	1	377	1	24%
RAAPBAR007E05.g	blastn	dbESTs_Llongipalpis.fasta	AM103694 Lutzomyia longipalpis Jacobina whole fly Lutzomyia longipalpis cDNA clone NSFM-25e11, mRNA sequence	AM103694	1e-126	450	1	379	1	49%
RAAPBAR007E08.g	blastn	dbESTs_Llongipalpis.fasta	AM089719 Lutzomyia longipalpis Jacobina whole fly Lutzomyia longipalpis cDNA clone NSFM-38e04, mRNA sequence	AM089719	8e-13	74	1	475	1	40%
RAAPBAR007E09.g	blastn	dbESTs_Llongipalpis.fasta	LJGU-M-5_D05 Adult female Lutzomyia longipalpis midgut library sugar fed Lutzomyia longipalpis cDNA, mRNA sequence	EW995634	3e-42	170	1	306	1	33%
RAAPBAR007F03.g	blastn	dbESTs_Llongipalpis.fasta	LJGFM-P02_A09 Adult female Lutzomyia longipalpis midgut library blood fed Lutzomyia longipalpis cDNA, mRNA sequence	EW988494	1e-120	428	1	321	1	33%
RAAPBAR007F04.g	blastn	dbESTs_Llongipalpis.fasta	AM098153 Lutzomyia longipalpis Jacobina whole fly Lutzomyia longipalpis cDNA clone NSFM-117d02, mRNA sequence	AM098153	0	684	1	784	2	30%
RAAPBAR007F10.g	blastn	dbESTs_Llongipalpis.fasta	LJGFIM26_H02 Adult female Lutzomyia longipalpis midgut library blood fed containing Leishmania chagasi Lutzomyia longipalpis cDNA, mRNA sequence	EW990433	1e-56	218	1	291	1	26%
RAAPBAR007F12.g	blastn	dbESTs_Llongipalpis.fasta	AM093465 Lutzomyia longipalpis Jacobina whole fly Lutzomyia longipalpis cDNA clone SFM-05g03, mRNA sequence	AM093465	5e-72	270	1	362	1	31%
RAAPBAR007G02.g	blastn	dbESTs_Llongipalpis.fasta	LJGDIS32_H07 Adult female Lutzomyia longipalpis midgut library post blood meal digestion containing Leishmania chagasi Lutzomyia longipalpis cDNA, mRNA sequence	EW993981	1e-48	192	1	480	1	15%
RAAPBAR007G05.g	blastn	dbESTs_Llongipalpis.fasta	LJGFS_P01_B09 Adult female Lutzomyia longipalpis midgut library blood fed Lutzomyia longipalpis cDNA, mRNA sequence	EW988770	5e-69	260	1	390	4	42%
RAAPBAR007G07.g	blastn	dbESTs_Llongipalpis.fasta	LJGFIL2_B09 Adult female Lutzomyia longipalpis midgut library blood fed containing Leishmania chagasi Lutzomyia longipalpis cDNA, mRNA sequence	EW989270	0	676	1	430	1	51%
RAAPBAR007G11.g	blastn	dbESTs_Llongipalpis.fasta	AM096946 Lutzomyia longipalpis Jacobina whole fly Lutzomyia longipalpis cDNA clone NSFM-133c03, mRNA sequence	AM096946	1e-102	369	1	250	1	43%
RAAPBAR007G12.g	blastn	dbESTs_Llongipalpis.fasta	LJGFIM20_A01 Adult female Lutzomyia longipalpis midgut library blood fed containing Leishmania chagasi Lutzomyia longipalpis cDNA, mRNA sequence	EW989871	5e-43	172	1	206	1	33%
RAAPBAR007H03.g	blastn	dbESTs_Llongipalpis.fasta	LJGFS_P03_D12 Adult female Lutzomyia longipalpis midgut library blood fed Lutzomyia longipalpis cDNA, mRNA sequence	EW988966	1e-136	484	1	308	1	37%
RAAPBAR008A01.g	blastn	dbESTs_Llongipalpis.fasta	AM090752 Lutzomyia longipalpis Jacobina whole fly Lutzomyia longipalpis cDNA clone NSFM-57f01, mRNA sequence	AM090752	5e-41	167	1	323	1	47%
RAAPBAR008A06.g	blastn	dbESTs_Llongipalpis.fasta	LJGFS_P01_B09 Adult female Lutzomyia longipalpis midgut library blood fed Lutzomyia longipalpis cDNA, mRNA sequence	EW988770	1e-81	301	1	247	1	33%
RAAPBAR008A08.g	blastn	dbESTs_Llongipalpis.fasta	AM101171 Lutzomyia longipalpis Jacobina whole fly Lutzomyia longipalpis cDNA clone NSFM-72a09, mRNA sequence	AM101171	1e-70	264	1	176	1	35%
RAAPBAR008A11.g	blastn	dbESTs_Llongipalpis.fasta	AM092587 Lutzomyia longipalpis Jacobina whole fly Lutzomyia longipalpis cDNA clone NSFM-105h11, mRNA sequence	AM092587	1e-110	396	1	443	1	22%
RAAPBAR008C08.g	blastn	dbESTs_Llongipalpis.fasta	AM097123 Lutzomyia longipalpis Jacobina whole fly Lutzomyia longipalpis cDNA clone NSFM-10c05, mRNA sequence	AM097123	7e-08	56	1	177	1	28%
RAAPBAR008D02.g	blastn	dbESTs_Llongipalpis.fasta	AM104720 Lutzomyia longipalpis Jacobina whole fly Lutzomyia longipalpis cDNA clone NSFM-42f03, mRNA sequence	AM104720	1e-118	424	1	351	1	36%
RAAPBAR008D04.g	blastn	dbESTs_Llongipalpis.fasta	LJGFM9_A02 Adult female Lutzomyia longipalpis midgut library blood fed Lutzomyia longipalpis cDNA, mRNA sequence	EW988312	0	664	1	717	1	51%
RAAPBAR008D07.g	blastn	dbESTs_Llongipalpis.fasta	LJGDM27_E06 Adult female Lutzomyia longipalpis midgut library post blood meal digestion Lutzomyia longipalpis cDNA, mRNA sequence	EW992409	8e-65	246	1	370	1	24%
RAAPBAR008D10.g	blastn	dbESTs_Llongipalpis.fasta	AM094066 Lutzomyia longipalpis Jacobina whole fly Lutzomyia longipalpis cDNA clone SFM-04e03, mRNA sequence	AM094066	5e-37	153	1	215	1	25%
RAAPBAR008D12.g	blastn	dbESTs_Llongipalpis.fasta	LJGD-L5_A12 Adult female Lutzomyia longipalpis midgut library post blood meal digestion Lutzomyia longipalpis cDNA, mRNA sequence	EW991410	0	652	1	712	1	49%
RAAPBAR008E02.g	blastn	dbESTs_Llongipalpis.fasta	LJGFM-P01_F12 Adult female Lutzomyia longipalpis midgut library blood fed Lutzomyia longipalpis cDNA, mRNA sequence	EW988463	3e-59	226	1	156	1	43%
RAAPBAR008E09.g	blastn	dbESTs_Llongipalpis.fasta	AM092895 Lutzomyia longipalpis Jacobina whole fly Lutzomyia longipalpis cDNA clone NSFM-44d07, mRNA sequence	AM092895	0	876	1	582	1	47%
RAAPBAR008F06.g	blastn	dbESTs_Llongipalpis.fasta	AM091604 Lutzomyia longipalpis Jacobina whole fly Lutzomyia longipalpis cDNA clone NSFM-31g08, mRNA sequence	AM091604	0	1199	1	711	1	35%
RAAPBAR008H01.g	blastn	dbESTs_Llongipalpis.fasta	LJGUL-P03_H08 Adult female Lutzomyia longipalpis midgut library sugar fed Lutzomyia longipalpis cDNA, mRNA sequence	EW995475	7e-89	325	1	247	1	48%
RAAPBAR008H08.g	blastn	dbESTs_Llongipalpis.fasta	AM105533 Lutzomyia longipalpis Jacobina whole fly Lutzomyia longipalpis cDNA clone NSFM-20b02, mRNA sequence	AM105533	4e-07	54	1	243	1	37%
RAAPBAR009A02.g	blastn	dbESTs_Llongipalpis.fasta	LJGUM-P01_B08 Adult female Lutzomyia longipalpis midgut library sugar fed Lutzomyia longipalpis cDNA, mRNA sequence	EW996013	4e-84	309	1	229	1	31%
RAAPBAR009A04.g	blastn	dbESTs_Llongipalpis.fasta	LJGUM-P01_B08 Adult female Lutzomyia longipalpis midgut library sugar fed Lutzomyia longipalpis cDNA, mRNA sequence	EW996013	5e-84	309	1	311	6	40%
RAAPBAR009A05.g	blastn	dbESTs_Llongipalpis.fasta	AM099354 Lutzomyia longipalpis Jacobina whole fly Lutzomyia longipalpis cDNA clone NSFM-19d10, mRNA sequence	AM099354	0	928	1	617	2	49%
RAAPBAR009A07.g	blastn	dbESTs_Llongipalpis.fasta	AM106957 Lutzomyia longipalpis Jacobina whole fly Lutzomyia longipalpis cDNA clone NSFM-123f08, mRNA sequence	AM106957	0	898	1	533	1	47%
RAAPBAR009A08.g	blastn	dbESTs_Llongipalpis.fasta	LJGD-L3_H03 Adult female Lutzomyia longipalpis midgut library post blood meal digestion Lutzomyia longipalpis cDNA, mRNA sequence	EW991322	7e-55	212	1	262	6	26%
RAAPBAR009A11.g	blastn	dbESTs_Llongipalpis.fasta	AM101768 Lutzomyia longipalpis Jacobina whole fly Lutzomyia longipalpis cDNA clone NSFM-18c10, mRNA sequence	AM101768	1e-154	543	1	333	1	47%
RAAPBAR009B01.g	blastn	dbESTs_Llongipalpis.fasta	AM096121 Lutzomyia longipalpis Jacobina whole fly Lutzomyia longipalpis cDNA clone NSFM-137g10, mRNA sequence	AM096121	1e-104	377	1	458	1	40%
RAAPBAR009C01.g	blastn	dbESTs_Llongipalpis.fasta	AM093250 Lutzomyia longipalpis Jacobina whole fly Lutzomyia longipalpis cDNA clone NSFM-62a11, mRNA sequence	AM093250	1e-82	305	1	424	1	22%
RAAPBAR009C02.g	blastn	dbESTs_Llongipalpis.fasta	AM104836 Lutzomyia longipalpis Jacobina whole fly Lutzomyia longipalpis cDNA clone NSFM-22e07, mRNA sequence	AM104836	1e-63	242	1	305	1	23%
RAAPBAR009C03.g	blastn	dbESTs_Llongipalpis.fasta	AM100308 Lutzomyia longipalpis Jacobina whole fly Lutzomyia longipalpis cDNA clone NSFM-152c07, mRNA sequence	AM100308	4e-38	157	1	303	1	24%
RAAPBAR009C06.g	blastn	dbESTs_Llongipalpis.fasta	LJGFS_P01_F04 Adult female Lutzomyia longipalpis midgut library blood fed Lutzomyia longipalpis cDNA, mRNA sequence	EW988810	3e-68	256	1	170	7	34%
RAAPBAR009C07.g	blastn	dbESTs_Llongipalpis.fasta	AM109174 Lutzomyia longipalpis Jacobina whole fly Lutzomyia longipalpis cDNA clone NSFM-25h01, mRNA sequence	AM109174	1e-135	480	1	439	1	35%
RAAPBAR009C10.g	blastn	dbESTs_Llongipalpis.fasta	AM104309 Lutzomyia longipalpis Jacobina whole fly Lutzomyia longipalpis cDNA clone NSFM-94a04, mRNA sequence	AM104309	0	1217	1	688	3	49%
RAAPBAR009C11.g	blastn	dbESTs_Llongipalpis.fasta	AM093195 Lutzomyia longipalpis Jacobina whole fly Lutzomyia longipalpis cDNA clone NSFM-01f02, mRNA sequence	AM093195	2e-42	170	1	230	1	21%
RAAPBAR009D01.g	blastn	dbESTs_Llongipalpis.fasta	LJGFIM24_F02 Adult female Lutzomyia longipalpis midgut library blood fed containing Leishmania chagasi Lutzomyia longipalpis cDNA, mRNA sequence	EW990248	0	718	1	493	5	44%
RAAPBAR009D02.g	blastn	dbESTs_Llongipalpis.fasta	AM108499 Lutzomyia longipalpis Jacobina whole fly Lutzomyia longipalpis cDNA clone NSFM-112b07, mRNA sequence	AM108499	1e-171	599	1	409	1	26%
RAAPBAR009D04.g	blastn	dbESTs_Llongipalpis.fasta	AM109560 Lutzomyia longipalpis Jacobina whole fly Lutzomyia longipalpis cDNA clone NSFM-19g06, mRNA sequence	AM109560	2e-11	70	1	602	1	37%
RAAPBAR009D05.g	blastn	dbESTs_Llongipalpis.fasta	LJGFIL6_F01 Adult female Lutzomyia longipalpis midgut library blood fed containing Leishmania chagasi Lutzomyia longipalpis cDNA, mRNA sequence	EW989601	3e-35	147	1	188	1	24%
RAAPBAR009D07.g	blastn	dbESTs_Llongipalpis.fasta	AM088834 Lutzomyia longipalpis Jacobina whole fly Lutzomyia longipalpis cDNA clone NSFM-65d05, mRNA sequence	AM088834	0	1001	1	612	1	49%
RAAPBAR009E01.g	blastn	dbESTs_Llongipalpis.fasta	LJGDIM29_D08 Adult female Lutzomyia longipalpis midgut library post blood meal digestion containing Leishmania chagasi Lutzomyia longipalpis cDNA, mRNA sequence	EW993691	0	688	1	1239	8	23%
RAAPBAR009E02.g	blastn	dbESTs_Llongipalpis.fasta	AM100112 Lutzomyia longipalpis Jacobina whole fly Lutzomyia longipalpis cDNA clone NSFM-122h03, mRNA sequence	AM100112	1e-128	458	1	552	1	29%
RAAPBAR009E05.g	blastn	dbESTs_Llongipalpis.fasta	LJGFIS32_H02 Adult female Lutzomyia longipalpis midgut library blood fed containing Leishmania chagasi Lutzomyia longipalpis cDNA, mRNA sequence	EW990931	3e-88	323	1	278	1	19%
RAAPBAR009E06.g	blastn	dbESTs_Llongipalpis.fasta	AM098330 Lutzomyia longipalpis Jacobina whole fly Lutzomyia longipalpis cDNA clone NSFM-50f09, mRNA sequence	AM098330	0	662	1	600	1	46%
RAAPBAR009E07.g	blastn	dbESTs_Llongipalpis.fasta	AM090799 Lutzomyia longipalpis Jacobina whole fly Lutzomyia longipalpis cDNA clone NSFM-32d08, mRNA sequence	AM090799	0	954	1	654	1	41%
RAAPBAR009E08.g	blastn	dbESTs_Llongipalpis.fasta	LJGFS_P02_D11 Adult female Lutzomyia longipalpis midgut library blood fed Lutzomyia longipalpis cDNA, mRNA sequence	EW988881	2e-32	139	1	441	1	51%
RAAPBAR009E10.g	blastn	dbESTs_Llongipalpis.fasta	LJGDIM22_D08 Adult female Lutzomyia longipalpis midgut library post blood meal digestion containing Leishmania chagasi Lutzomyia longipalpis cDNA, mRNA sequence	EW993150	0	751	1	538	8	39%
RAAPBAR009F02.g	blastn	dbESTs_Llongipalpis.fasta	LJGFIM22_C02 Adult female Lutzomyia longipalpis midgut library blood fed containing Leishmania chagasi Lutzomyia longipalpis cDNA, mRNA sequence	EW990055	1e-143	505	1	628	1	26%
RAAPBAR009F03.g	blastn	dbESTs_Llongipalpis.fasta	LJGDM25_D03 Adult female Lutzomyia longipalpis midgut library post blood meal digestion Lutzomyia longipalpis cDNA, mRNA sequence	EW992230	0	636	1	390	1	50%
RAAPBAR009F06.g	blastn	dbESTs_Llongipalpis.fasta	AM096644 Lutzomyia longipalpis Jacobina whole fly Lutzomyia longipalpis cDNA clone NSFM-133e11, mRNA sequence	AM096644	0	1021	1	678	1	56%
RAAPBAR009F08.g	blastn	dbESTs_Llongipalpis.fasta	LJGFIL3_B10 Adult female Lutzomyia longipalpis midgut library blood fed containing Leishmania chagasi Lutzomyia longipalpis cDNA, mRNA sequence	EW989346	0	664	1	480	1	41%
RAAPBAR009F12.g	blastn	dbESTs_Llongipalpis.fasta	AM095518 Lutzomyia longipalpis Jacobina whole fly Lutzomyia longipalpis cDNA clone NSFM-76e11, mRNA sequence	AM095518	0	924	1	752	2	41%
RAAPBAR009G01.g	blastn	dbESTs_Llongipalpis.fasta	AM089596 Lutzomyia longipalpis Jacobina whole fly Lutzomyia longipalpis cDNA clone NSFM-11c08, mRNA sequence	AM089596	0	676	1	850	5	28%
RAAPBAR009G02.g	blastn	dbESTs_Llongipalpis.fasta	AM109044 Lutzomyia longipalpis Jacobina whole fly Lutzomyia longipalpis cDNA clone NSFM-135e03, mRNA sequence	AM109044	0	1364	1	774	3	44%
RAAPBAR009G08.g	blastn	dbESTs_Llongipalpis.fasta	LJGDM32_C06 Adult female Lutzomyia longipalpis midgut library post blood meal digestion Lutzomyia longipalpis cDNA, mRNA sequence	EW992817	1e-110	396	1	301	1	39%
RAAPBAR009G12.g	blastn	dbESTs_Llongipalpis.fasta	AM097915 Lutzomyia longipalpis Jacobina whole fly Lutzomyia longipalpis cDNA clone NSFM-108f07, mRNA sequence	AM097915	0	1033	1	641	2	46%
RAAPBAR009H05.g	blastn	dbESTs_Llongipalpis.fasta	LJGDM27_A10 Adult female Lutzomyia longipalpis midgut library post blood meal digestion Lutzomyia longipalpis cDNA, mRNA sequence	EW992369	1e-162	569	1	501	2	34%
RAAPBAR009H07.g	blastn	dbESTs_Llongipalpis.fasta	AM106581 Lutzomyia longipalpis Jacobina whole fly Lutzomyia longipalpis cDNA clone NSFM-01a03, mRNA sequence	AM106581	4e-68	256	1	191	1	32%
RAAPBAR009H08.g	blastn	dbESTs_Llongipalpis.fasta	LJGFIL6_D03 Adult female Lutzomyia longipalpis midgut library blood fed containing Leishmania chagasi Lutzomyia longipalpis cDNA, mRNA sequence	EW989585	2e-69	262	1	482	1	42%
RAAPBAR009H11.g	blastn	dbESTs_Llongipalpis.fasta	AM103147 Lutzomyia longipalpis Jacobina whole fly Lutzomyia longipalpis cDNA clone NSFM-124g01, mRNA sequence	AM103147	0	1098	1	616	1	46%
RAAPBAR010A01.g	blastn	dbESTs_Llongipalpis.fasta	AM108707 Lutzomyia longipalpis Jacobina whole fly Lutzomyia longipalpis cDNA clone NSFM-142d05, mRNA sequence	AM108707	3e-78	289	1	187	1	43%
RAAPBAR010A03.g	blastn	dbESTs_Llongipalpis.fasta	AM091127 Lutzomyia longipalpis Jacobina whole fly Lutzomyia longipalpis cDNA clone NSFM-130h09, mRNA sequence	AM091127	2e-69	262	1	488	1	28%
RAAPBAR010A08.g	blastn	dbESTs_Llongipalpis.fasta	LJGFIM25_G02 Adult female Lutzomyia longipalpis midgut library blood fed containing Leishmania chagasi Lutzomyia longipalpis cDNA, mRNA sequence	EW990337	2e-16	86	1	427	1	48%
RAAPBAR010A11.g	blastn	dbESTs_Llongipalpis.fasta	AM095034 Lutzomyia longipalpis Jacobina whole fly Lutzomyia longipalpis cDNA clone NSFM-38h07, mRNA sequence	AM095034	3e-97	353	1	247	1	47%
RAAPBAR010A12.g	blastn	dbESTs_Llongipalpis.fasta	AM092246 Lutzomyia longipalpis Jacobina whole fly Lutzomyia longipalpis cDNA clone NSFM-40c01, mRNA sequence	AM092246	5e-84	309	1	300	1	52%
RAAPBAR010B11.g	blastn	dbESTs_Llongipalpis.fasta	LJGD-L6_F09 Adult female Lutzomyia longipalpis midgut library post blood meal digestion Lutzomyia longipalpis cDNA, mRNA sequence	EW991538	0	680	1	488	2	49%
RAAPBAR010B12.g	blastn	dbESTs_Llongipalpis.fasta	AM092654 Lutzomyia longipalpis Jacobina whole fly Lutzomyia longipalpis cDNA clone NSFM-105b06, mRNA sequence	AM092654	0	654	1	435	1	28%
RAAPBAR010C11.g	blastn	dbESTs_Llongipalpis.fasta	AM091605 Lutzomyia longipalpis Jacobina whole fly Lutzomyia longipalpis cDNA clone NSFM-66g10, mRNA sequence	AM091605	2e-73	274	1	256	1	34%
RAAPBAR010D01.g	blastn	dbESTs_Llongipalpis.fasta	AM101027 Lutzomyia longipalpis Jacobina whole fly Lutzomyia longipalpis cDNA clone NSFM-155c12, mRNA sequence	AM101027	1e-166	583	1	391	1	42%
RAAPBAR010D05.g	blastn	dbESTs_Llongipalpis.fasta	AM093875 Lutzomyia longipalpis Jacobina whole fly Lutzomyia longipalpis cDNA clone NSFM-40f02, mRNA sequence	AM093875	1e-85	315	1	525	1	26%
RAAPBAR010D10.g	blastn	dbESTs_Llongipalpis.fasta	LJGFIM20_D05 Adult female Lutzomyia longipalpis midgut library blood fed containing Leishmania chagasi Lutzomyia longipalpis cDNA, mRNA sequence	EW989907	2e-25	115	1	429	1	28%
RAAPBAR010E02.g	blastn	dbESTs_Llongipalpis.fasta	AM090219 Lutzomyia longipalpis Jacobina whole fly Lutzomyia longipalpis cDNA clone SFM-02h03, mRNA sequence	AM090219	3e-33	139	1	109	1	20%
RAAPBAR010E03.g	blastn	dbESTs_Llongipalpis.fasta	AM105692 Lutzomyia longipalpis Jacobina whole fly Lutzomyia longipalpis cDNA clone NSFM-13g10, mRNA sequence	AM105692	3e-38	157	1	184	1	17%
RAAPBAR010E05.g	blastn	dbESTs_Llongipalpis.fasta	AM091626 Lutzomyia longipalpis Jacobina whole fly Lutzomyia longipalpis cDNA clone NSFM-48f12, mRNA sequence	AM091626	0	934	1	522	1	49%
RAAPBAR010E08.g	blastn	dbESTs_Llongipalpis.fasta	AM108138 Lutzomyia longipalpis Jacobina whole fly Lutzomyia longipalpis cDNA clone NSFM-115g09, mRNA sequence	AM108138	0	835	1	552	1	42%
RAAPBAR010F09.g	blastn	dbESTs_Llongipalpis.fasta	LJGUM-P01_B08 Adult female Lutzomyia longipalpis midgut library sugar fed Lutzomyia longipalpis cDNA, mRNA sequence	EW996013	5e-84	309	1	278	1	36%
RAAPBAR010F12.g	blastn	dbESTs_Llongipalpis.fasta	AM089448 Lutzomyia longipalpis Jacobina whole fly Lutzomyia longipalpis cDNA clone NSFM-80f03, mRNA sequence	AM089448	5e-94	343	1	399	1	31%
RAAPBAR010G02.g	blastn	dbESTs_Llongipalpis.fasta	LJGUS_P01_G03 Adult female Lutzomyia longipalpis midgut library sugar fed Lutzomyia longipalpis cDNA, mRNA sequence	EW996387	4e-49	192	1	149	1	36%
RAAPBAR010G07.g	blastn	dbESTs_Llongipalpis.fasta	LJGD-L3_H03 Adult female Lutzomyia longipalpis midgut library post blood meal digestion Lutzomyia longipalpis cDNA, mRNA sequence	EW991322	9e-23	105	1	199	1	39%
RAAPBAR010G10.g	blastn	dbESTs_Llongipalpis.fasta	LJGFIL5_F06 Adult female Lutzomyia longipalpis midgut library blood fed containing Leishmania chagasi Lutzomyia longipalpis cDNA, mRNA sequence	EW989527	0	712	1	536	1	50%
RAAPBAR010H07.g	blastn	dbESTs_Llongipalpis.fasta	LJGDM33_G01 Adult female Lutzomyia longipalpis midgut library post blood meal digestion Lutzomyia longipalpis cDNA, mRNA sequence	EW992941	1e-160	561	1	330	1	45%
RAAPBAR010H10.g	blastn	dbESTs_Llongipalpis.fasta	LJGDIS33_B04 Adult female Lutzomyia longipalpis midgut library post blood meal digestion containing Leishmania chagasi Lutzomyia longipalpis cDNA, mRNA sequence	EW993999	0	672	1	419	1	38%
RAAPBAR011A02.g	blastn	dbESTs_Llongipalpis.fasta	LJGF-L-10_A11 Adult female Lutzomyia longipalpis midgut library blood fed Lutzomyia longipalpis cDNA, mRNA sequence	EW987459	1e-150	529	1	314	1	47%
RAAPBAR011A05.g	blastn	dbESTs_Llongipalpis.fasta	AM100287 Lutzomyia longipalpis Jacobina whole fly Lutzomyia longipalpis cDNA clone SFM-03a03, mRNA sequence	AM100287	0	704	1	429	1	49%
RAAPBAR011A11.g	blastn	dbESTs_Llongipalpis.fasta	LJGFIM25_A05 Adult female Lutzomyia longipalpis midgut library blood fed containing Leishmania chagasi Lutzomyia longipalpis cDNA, mRNA sequence	EW990281	0	706	1	404	1	51%
RAAPBAR011A12.g	blastn	dbESTs_Llongipalpis.fasta	AM108687 Lutzomyia longipalpis Jacobina whole fly Lutzomyia longipalpis cDNA clone NSFM-40c10, mRNA sequence	AM108687	0	634	1	343	1	54%
RAAPBAR011B10.g	blastn	dbESTs_Llongipalpis.fasta	LJGDIM24_G01 Adult female Lutzomyia longipalpis midgut library post blood meal digestion containing Leishmania chagasi Lutzomyia longipalpis cDNA, mRNA sequence	EW993338	0	1072	1	620	1	41%
RAAPBAR011B11.g	blastn	dbESTs_Llongipalpis.fasta	LJGUM-P01_B08 Adult female Lutzomyia longipalpis midgut library sugar fed Lutzomyia longipalpis cDNA, mRNA sequence	EW996013	2e-48	190	1	188	1	38%
RAAPBAR011C02.g	blastn	dbESTs_Llongipalpis.fasta	AM102613 Lutzomyia longipalpis Jacobina whole fly Lutzomyia longipalpis cDNA clone NSFM-164c08, mRNA sequence	AM102613	0	670	1	530	1	45%
RAAPBAR011C11.g	blastn	dbESTs_Llongipalpis.fasta	AM099672 Lutzomyia longipalpis Jacobina whole fly Lutzomyia longipalpis cDNA clone NSFM-38e09, mRNA sequence	AM099672	2e-23	107	1	194	1	35%
RAAPBAR011D05.g	blastn	dbESTs_Llongipalpis.fasta	AM106988 Lutzomyia longipalpis Jacobina whole fly Lutzomyia longipalpis cDNA clone NSFM-146h01, mRNA sequence	AM106988	1e-81	301	1	322	1	42%
RAAPBAR011D10.g	blastn	dbESTs_Llongipalpis.fasta	LJGD-L3_H03 Adult female Lutzomyia longipalpis midgut library post blood meal digestion Lutzomyia longipalpis cDNA, mRNA sequence	EW991322	1e-08	60	1	375	1	39%
RAAPBAR011D11.g	blastn	dbESTs_Llongipalpis.fasta	AM106863 Lutzomyia longipalpis Jacobina whole fly Lutzomyia longipalpis cDNA clone NSFM-130d04, mRNA sequence	AM106863	1e-57	222	1	450	1	33%
RAAPBAR011E01.g	blastn	dbESTs_Llongipalpis.fasta	AM104267 Lutzomyia longipalpis Jacobina whole fly Lutzomyia longipalpis cDNA clone NSFM-12f02, mRNA sequence	AM104267	1e-117	420	1	270	1	44%
RAAPBAR011E02.g	blastn	dbESTs_Llongipalpis.fasta	LJGFIM26_F03 Adult female Lutzomyia longipalpis midgut library blood fed containing Leishmania chagasi Lutzomyia longipalpis cDNA, mRNA sequence	EW990418	2e-06	52	1	354	1	44%
RAAPBAR011E03.g	blastn	dbESTs_Llongipalpis.fasta	LJGDIL10_F04 Adult female Lutzomyia longipalpis midgut library post blood meal digestion containing Leishmania chagasi Lutzomyia longipalpis cDNA, mRNA sequence	EW994204	1e-138	490	1	537	1	43%
RAAPBAR011E11.g	blastn	dbESTs_Llongipalpis.fasta	LJGU-M-6_G12 Adult female Lutzomyia longipalpis midgut library sugar fed Lutzomyia longipalpis cDNA, mRNA sequence	EW995742	0	803	1	497	1	39%
RAAPBAR011F04.g	blastn	dbESTs_Llongipalpis.fasta	AM098932 Lutzomyia longipalpis Jacobina whole fly Lutzomyia longipalpis cDNA clone NSFM-149b11, mRNA sequence	AM098932	3e-91	333	1	299	1	46%
RAAPBAR011F05.g	blastn	dbESTs_Llongipalpis.fasta	AM092153 Lutzomyia longipalpis Jacobina whole fly Lutzomyia longipalpis cDNA clone NSFM-10h09, mRNA sequence	AM092153	0	791	1	443	1	50%
RAAPBAR011F09.g	blastn	dbESTs_Llongipalpis.fasta	AM107059 Lutzomyia longipalpis Jacobina whole fly Lutzomyia longipalpis cDNA clone NSFM-28h06, mRNA sequence	AM107059	9e-08	56	1	222	1	29%
RAAPBAR011F10.g	blastn	dbESTs_Llongipalpis.fasta	AM095120 Lutzomyia longipalpis Jacobina whole fly Lutzomyia longipalpis cDNA clone NSFM-81g07, mRNA sequence	AM095120	1e-144	509	1	310	1	46%
RAAPBAR011F11.g	blastn	dbESTs_Llongipalpis.fasta	LJGU-M-6_B11 Adult female Lutzomyia longipalpis midgut library sugar fed Lutzomyia longipalpis cDNA, mRNA sequence	EW995689	0	714	1	434	1	44%
RAAPBAR011G02.g	blastn	dbESTs_Llongipalpis.fasta	AM106711 Lutzomyia longipalpis Jacobina whole fly Lutzomyia longipalpis cDNA clone NSFM-118a05, mRNA sequence	AM106711	4e-59	226	1	211	1	30%
RAAPBAR011G08.g	blastn	dbESTs_Llongipalpis.fasta	AM088779 Lutzomyia longipalpis Jacobina whole fly Lutzomyia longipalpis cDNA clone NSFM-138f12, mRNA sequence	AM088779	1e-22	105	1	236	1	25%
RAAPBAR011G10.g	blastn	dbESTs_Llongipalpis.fasta	AM105720 Lutzomyia longipalpis Jacobina whole fly Lutzomyia longipalpis cDNA clone NSFM-43e03, mRNA sequence	AM105720	0	1043	1	614	1	48%
RAAPBAR011H08.g	blastn	dbESTs_Llongipalpis.fasta	LJGFS_P01_B09 Adult female Lutzomyia longipalpis midgut library blood fed Lutzomyia longipalpis cDNA, mRNA sequence	EW988770	1e-81	301	1	241	1	34%
RAAPBAR011H12.g	blastn	dbESTs_Llongipalpis.fasta	AM101248 Lutzomyia longipalpis Jacobina whole fly Lutzomyia longipalpis cDNA clone NSFM-54c02, mRNA sequence	AM101248	4e-82	303	1	364	1	25%
RAAPBAR012A01.g	blastn	dbESTs_Llongipalpis.fasta	LJGDIS30_C06 Adult female Lutzomyia longipalpis midgut library post blood meal digestion containing Leishmania chagasi Lutzomyia longipalpis cDNA, mRNA sequence	EW993747	0	755	1	450	2	52%
RAAPBAR012A03.g	blastn	dbESTs_Llongipalpis.fasta	AM102745 Lutzomyia longipalpis Jacobina whole fly Lutzomyia longipalpis cDNA clone NSFM-58f11, mRNA sequence	AM102745	2e-35	147	1	173	1	28%
RAAPBAR012A04.g	blastn	dbESTs_Llongipalpis.fasta	LJGDM25_H02 Adult female Lutzomyia longipalpis midgut library post blood meal digestion Lutzomyia longipalpis cDNA, mRNA sequence	EW992269	1e-153	541	1	565	4	48%
RAAPBAR012A05.g	blastn	dbESTs_Llongipalpis.fasta	AM093765 Lutzomyia longipalpis Jacobina whole fly Lutzomyia longipalpis cDNA clone NSFM-161h02, mRNA sequence	AM093765	1e-101	365	1	275	1	39%
RAAPBAR012A11.g	blastn	dbESTs_Llongipalpis.fasta	LJGFIM25_D10 Adult female Lutzomyia longipalpis midgut library blood fed containing Leishmania chagasi Lutzomyia longipalpis cDNA, mRNA sequence	EW990314	1e-155	547	1	290	1	53%
RAAPBAR012A12.g	blastn	dbESTs_Llongipalpis.fasta	AM093196 Lutzomyia longipalpis Jacobina whole fly Lutzomyia longipalpis cDNA clone NSFM-01f02, mRNA sequence	AM093196	1e-130	464	1	268	1	36%
RAAPBAR012B06.g	blastn	dbESTs_Llongipalpis.fasta	LJGDIL8_C01 Adult female Lutzomyia longipalpis midgut library post blood meal digestion containing Leishmania chagasi Lutzomyia longipalpis cDNA, mRNA sequence	EW994737	2e-19	96	1	353	1	36%
RAAPBAR012B11.g	blastn	dbESTs_Llongipalpis.fasta	LJGUS_P01_G03 Adult female Lutzomyia longipalpis midgut library sugar fed Lutzomyia longipalpis cDNA, mRNA sequence	EW996387	2e-76	283	1	237	3	28%
RAAPBAR012C04.g	blastn	dbESTs_Llongipalpis.fasta	AM095518 Lutzomyia longipalpis Jacobina whole fly Lutzomyia longipalpis cDNA clone NSFM-76e11, mRNA sequence	AM095518	1e-158	555	1	507	1	47%
RAAPBAR012C11.g	blastn	dbESTs_Llongipalpis.fasta	LJGFL_P04_F10 Adult female Lutzomyia longipalpis midgut library blood fed Lutzomyia longipalpis cDNA, mRNA sequence	EW987428	0	1148	1	729	3	52%
RAAPBAR012C12.g	blastn	dbESTs_Llongipalpis.fasta	AM099147 Lutzomyia longipalpis Jacobina whole fly Lutzomyia longipalpis cDNA clone NSFM-115h05, mRNA sequence	AM099147	1e-132	470	1	533	1	48%
RAAPBAR012D01.g	blastn	dbESTs_Llongipalpis.fasta	LJGFS_P01_B09 Adult female Lutzomyia longipalpis midgut library blood fed Lutzomyia longipalpis cDNA, mRNA sequence	EW988770	1e-74	278	1	210	1	34%
RAAPBAR012D06.g	blastn	dbESTs_Llongipalpis.fasta	LJGDM23_G12 Adult female Lutzomyia longipalpis midgut library post blood meal digestion Lutzomyia longipalpis cDNA, mRNA sequence	EW992104	0	741	1	557	3	46%
RAAPBAR012D12.g	blastn	dbESTs_Llongipalpis.fasta	AM097659 Lutzomyia longipalpis Jacobina whole fly Lutzomyia longipalpis cDNA clone NSFM-80h01, mRNA sequence	AM097659	5e-16	84	1	285	2	24%
RAAPBAR012E01.g	blastn	dbESTs_Llongipalpis.fasta	LJGFS_P01_E09 Adult female Lutzomyia longipalpis midgut library blood fed Lutzomyia longipalpis cDNA, mRNA sequence	EW988804	4e-50	196	1	236	8	28%
RAAPBAR012E03.g	blastn	dbESTs_Llongipalpis.fasta	LJGDIM21_F09 Adult female Lutzomyia longipalpis midgut library post blood meal digestion containing Leishmania chagasi Lutzomyia longipalpis cDNA, mRNA sequence	EW993093	0	872	1	523	1	49%
RAAPBAR012E07.g	blastn	dbESTs_Llongipalpis.fasta	AM093949 Lutzomyia longipalpis Jacobina whole fly Lutzomyia longipalpis cDNA clone NSFM-139c04, mRNA sequence	AM093949	0	668	1	638	1	46%
RAAPBAR012E11.g	blastn	dbESTs_Llongipalpis.fasta	AM094504 Lutzomyia longipalpis Jacobina whole fly Lutzomyia longipalpis cDNA clone NSFM-138c02, mRNA sequence	AM094504	0	789	1	469	1	45%
RAAPBAR012F01.g	blastn	dbESTs_Llongipalpis.fasta	AM095579 Lutzomyia longipalpis Jacobina whole fly Lutzomyia longipalpis cDNA clone NSFM-165b11, mRNA sequence	AM095579	1e-103	375	1	408	1	35%
RAAPBAR012F02.g	blastn	dbESTs_Llongipalpis.fasta	AM093162 Lutzomyia longipalpis Jacobina whole fly Lutzomyia longipalpis cDNA clone NSFM-100c04, mRNA sequence	AM093162	0	690	1	540	1	45%
RAAPBAR012F03.g	blastn	dbESTs_Llongipalpis.fasta	AM106887 Lutzomyia longipalpis Jacobina whole fly Lutzomyia longipalpis cDNA clone NSFM-95c06, mRNA sequence	AM106887	2e-09	62	1	363	1	39%
RAAPBAR012F04.g	blastn	dbESTs_Llongipalpis.fasta	LJGFS_P01_F02 Adult female Lutzomyia longipalpis midgut library blood fed Lutzomyia longipalpis cDNA, mRNA sequence	EW988809	2e-39	161	1	260	1	23%
RAAPBAR012F06.g	blastn	dbESTs_Llongipalpis.fasta	LJGFIM28_A01 Adult female Lutzomyia longipalpis midgut library blood fed containing Leishmania chagasi Lutzomyia longipalpis cDNA, mRNA sequence	EW990526	6e-72	270	1	450	1	23%
RAAPBAR012F09.g	blastn	dbESTs_Llongipalpis.fasta	AM094571 Lutzomyia longipalpis Jacobina whole fly Lutzomyia longipalpis cDNA clone NSFM-147b06, mRNA sequence	AM094571	2e-15	82	1	279	2	41%
RAAPBAR012F11.g	blastn	dbESTs_Llongipalpis.fasta	LJGFM-P03_E01 Adult female Lutzomyia longipalpis midgut library blood fed Lutzomyia longipalpis cDNA, mRNA sequence	EW988629	1e-165	579	1	363	1	35%
RAAPBAR012F12.g	blastn	dbESTs_Llongipalpis.fasta	LJGDIM22_E02 Adult female Lutzomyia longipalpis midgut library post blood meal digestion containing Leishmania chagasi Lutzomyia longipalpis cDNA, mRNA sequence	EW993156	0	676	1	464	1	47%
RAAPBAR012G05.g	blastn	dbESTs_Llongipalpis.fasta	AM101977 Lutzomyia longipalpis Jacobina whole fly Lutzomyia longipalpis cDNA clone NSFM-59b09, mRNA sequence	AM101977	2e-45	180	1	157	1	22%
RAAPBAR012G08.g	blastn	dbESTs_Llongipalpis.fasta	LJGFIM26_C11 Adult female Lutzomyia longipalpis midgut library blood fed containing Leishmania chagasi Lutzomyia longipalpis cDNA, mRNA sequence	EW990391	0	636	1	403	3	44%
RAAPBAR012H02.g	blastn	dbESTs_Llongipalpis.fasta	LJGFIL9_G06 Adult female Lutzomyia longipalpis midgut library blood fed containing Leishmania chagasi Lutzomyia longipalpis cDNA, mRNA sequence	EW989857	1e-130	462	1	396	1	40%
RAAPBAR012H07.g	blastn	dbESTs_Llongipalpis.fasta	LJGDIL6_C03 Adult female Lutzomyia longipalpis midgut library post blood meal digestion containing Leishmania chagasi Lutzomyia longipalpis cDNA, mRNA sequence	EW994573	3e-83	307	1	439	1	38%
RAAPBAR012H10.g	blastn	dbESTs_Llongipalpis.fasta	LJGUS_P04_A05 Adult female Lutzomyia longipalpis midgut library sugar fed Lutzomyia longipalpis cDNA, mRNA sequence	EW996594	0	884	1	484	1	54%
RAAPBAR013A05.g	blastn	dbESTs_Llongipalpis.fasta	LJGFL_P03_A10 Adult female Lutzomyia longipalpis midgut library blood fed Lutzomyia longipalpis cDNA, mRNA sequence	EW987303	1e-161	565	1	292	2	50%
RAAPBAR013A10.g	blastn	dbESTs_Llongipalpis.fasta	AM098290 Lutzomyia longipalpis Jacobina whole fly Lutzomyia longipalpis cDNA clone NSFM-51b03, mRNA sequence	AM098290	9e-73	272	1	257	1	40%
RAAPBAR013A12.g	blastn	dbESTs_Llongipalpis.fasta	LJGD-L3_E03 Adult female Lutzomyia longipalpis midgut library post blood meal digestion Lutzomyia longipalpis cDNA, mRNA sequence	EW991299	1e-26	119	1	306	2	16%
RAAPBAR013B02.g	blastn	dbESTs_Llongipalpis.fasta	LJGUM-P01_B08 Adult female Lutzomyia longipalpis midgut library sugar fed Lutzomyia longipalpis cDNA, mRNA sequence	EW996013	4e-84	309	1	249	6	30%
RAAPBAR013B07.g	blastn	dbESTs_Llongipalpis.fasta	LJGD-L3_H03 Adult female Lutzomyia longipalpis midgut library post blood meal digestion Lutzomyia longipalpis cDNA, mRNA sequence	EW991322	9e-45	178	1	218	3	29%
RAAPBAR013B09.g	blastn	dbESTs_Llongipalpis.fasta	AM106076 Lutzomyia longipalpis Jacobina whole fly Lutzomyia longipalpis cDNA clone NSFM-02f11, mRNA sequence	AM106076	1e-101	367	1	451	1	24%
RAAPBAR013C04.g	blastn	dbESTs_Llongipalpis.fasta	LJGUM-P01_F08 Adult female Lutzomyia longipalpis midgut library sugar fed Lutzomyia longipalpis cDNA, mRNA sequence	EW996055	9e-51	198	1	213	1	23%
RAAPBAR013C06.g	blastn	dbESTs_Llongipalpis.fasta	AM089047 Lutzomyia longipalpis Jacobina whole fly Lutzomyia longipalpis cDNA clone NSFM-46d08, mRNA sequence	AM089047	4e-62	236	1	192	1	19%
RAAPBAR013D01.g	blastn	dbESTs_Llongipalpis.fasta	AM101173 Lutzomyia longipalpis Jacobina whole fly Lutzomyia longipalpis cDNA clone NSFM-91f06, mRNA sequence	AM101173	0	1019	1	635	2	47%
RAAPBAR013D03.g	blastn	dbESTs_Llongipalpis.fasta	LJGDIL3_H11 Adult female Lutzomyia longipalpis midgut library post blood meal digestion containing Leishmania chagasi Lutzomyia longipalpis cDNA, mRNA sequence	EW994391	0	644	1	580	1	46%
RAAPBAR013D04.g	blastn	dbESTs_Llongipalpis.fasta	AM109469 Lutzomyia longipalpis Jacobina whole fly Lutzomyia longipalpis cDNA clone NSFM-10e02, mRNA sequence	AM109469	0	692	1	489	1	47%
RAAPBAR013D07.g	blastn	dbESTs_Llongipalpis.fasta	LJGFIL2_B09 Adult female Lutzomyia longipalpis midgut library blood fed containing Leishmania chagasi Lutzomyia longipalpis cDNA, mRNA sequence	EW989270	0	842	1	605	8	44%
RAAPBAR013D08.g	blastn	dbESTs_Llongipalpis.fasta	LJGUS_P04_G09 Adult female Lutzomyia longipalpis midgut library sugar fed Lutzomyia longipalpis cDNA, mRNA sequence	EW996667	2e-34	145	1	329	1	23%
RAAPBAR013E01.g	blastn	dbESTs_Llongipalpis.fasta	AM095518 Lutzomyia longipalpis Jacobina whole fly Lutzomyia longipalpis cDNA clone NSFM-76e11, mRNA sequence	AM095518	1e-180	628	1	574	5	45%
RAAPBAR013E12.g	blastn	dbESTs_Llongipalpis.fasta	LJGFIM20_A01 Adult female Lutzomyia longipalpis midgut library blood fed containing Leishmania chagasi Lutzomyia longipalpis cDNA, mRNA sequence	EW989871	2e-60	230	1	170	1	34%
RAAPBAR013F01.g	blastn	dbESTs_Llongipalpis.fasta	AM107039 Lutzomyia longipalpis Jacobina whole fly Lutzomyia longipalpis cDNA clone NSFM-65c11, mRNA sequence	AM107039	0	807	1	646	2	40%
RAAPBAR013F02.g	blastn	dbESTs_Llongipalpis.fasta	AM090626 Lutzomyia longipalpis Jacobina whole fly Lutzomyia longipalpis cDNA clone NSFM-135a07, mRNA sequence	AM090626	3e-46	184	1	516	1	51%
RAAPBAR013F07.g	blastn	dbESTs_Llongipalpis.fasta	LJGFIS33_F12 Adult female Lutzomyia longipalpis midgut library blood fed containing Leishmania chagasi Lutzomyia longipalpis cDNA, mRNA sequence	EW991002	0	1247	1	890	1	43%
RAAPBAR013F08.g	blastn	dbESTs_Llongipalpis.fasta	AM107769 Lutzomyia longipalpis Jacobina whole fly Lutzomyia longipalpis cDNA clone NSFM-111f07, mRNA sequence	AM107769	1e-101	367	1	418	2	21%
RAAPBAR013G03.g	blastn	dbESTs_Llongipalpis.fasta	AM093884 Lutzomyia longipalpis Jacobina whole fly Lutzomyia longipalpis cDNA clone NSFM-40d04, mRNA sequence	AM093884	0	892	1	754	2	41%
RAAPBAR013G04.g	blastn	dbESTs_Llongipalpis.fasta	AM103355 Lutzomyia longipalpis Jacobina whole fly Lutzomyia longipalpis cDNA clone NSFM-31f06, mRNA sequence	AM103355	6e-39	159	1	161	1	19%
RAAPBAR013G06.g	blastn	dbESTs_Llongipalpis.fasta	LJGDM25_D11 Adult female Lutzomyia longipalpis midgut library post blood meal digestion Lutzomyia longipalpis cDNA, mRNA sequence	EW992236	0	716	1	875	9	27%
RAAPBAR013G07.g	blastn	dbESTs_Llongipalpis.fasta	LJGD-L3_H03 Adult female Lutzomyia longipalpis midgut library post blood meal digestion Lutzomyia longipalpis cDNA, mRNA sequence	EW991322	2e-52	204	1	234	1	29%
RAAPBAR013G09.g	blastn	dbESTs_Llongipalpis.fasta	LJGFL_P04_A07 Adult female Lutzomyia longipalpis midgut library blood fed Lutzomyia longipalpis cDNA, mRNA sequence	EW987374	0	1013	1	1362	5	28%
RAAPBAR013H05.g	blastn	dbESTs_Llongipalpis.fasta	AM103565 Lutzomyia longipalpis Jacobina whole fly Lutzomyia longipalpis cDNA clone NSFM-91g02, mRNA sequence	AM103565	9e-54	208	1	202	1	23%
RAAPBAR014A06.g	blastn	dbESTs_Llongipalpis.fasta	AM093148 Lutzomyia longipalpis Jacobina whole fly Lutzomyia longipalpis cDNA clone NSFM-02a07, mRNA sequence	AM093148	1e-30	131	1	154	1	22%
RAAPBAR014B01.g	blastn	dbESTs_Llongipalpis.fasta	AM092927 Lutzomyia longipalpis Jacobina whole fly Lutzomyia longipalpis cDNA clone NSFM-137g08, mRNA sequence	AM092927	0	797	1	539	1	45%
RAAPBAR014B03.g	blastn	dbESTs_Llongipalpis.fasta	AM098271 Lutzomyia longipalpis Jacobina whole fly Lutzomyia longipalpis cDNA clone NSFM-61c02, mRNA sequence	AM098271	0	1035	1	603	1	44%
RAAPBAR014B06.g	blastn	dbESTs_Llongipalpis.fasta	AM101672 Lutzomyia longipalpis Jacobina whole fly Lutzomyia longipalpis cDNA clone NSFM-32c02, mRNA sequence	AM101672	0	700	1	545	2	44%
RAAPBAR014C04.g	blastn	dbESTs_Llongipalpis.fasta	LJGD-L8_E10 Adult female Lutzomyia longipalpis midgut library post blood meal digestion Lutzomyia longipalpis cDNA, mRNA sequence	EW991684	0	1055	1	601	1	53%
RAAPBAR014C07.g	blastn	dbESTs_Llongipalpis.fasta	AM103865 Lutzomyia longipalpis Jacobina whole fly Lutzomyia longipalpis cDNA clone NSFM-02e04, mRNA sequence	AM103865	2e-65	248	1	310	1	24%
RAAPBAR014C10.g	blastn	dbESTs_Llongipalpis.fasta	AM091261 Lutzomyia longipalpis Jacobina whole fly Lutzomyia longipalpis cDNA clone NSFM-80c07, mRNA sequence	AM091261	1e-102	371	1	253	1	37%
RAAPBAR014D01.g	blastn	dbESTs_Llongipalpis.fasta	LJGUM-P01_H02 Adult female Lutzomyia longipalpis midgut library sugar fed Lutzomyia longipalpis cDNA, mRNA sequence	EW996073	1e-137	486	1	431	1	39%
RAAPBAR014D02.g	blastn	dbESTs_Llongipalpis.fasta	AM090562 Lutzomyia longipalpis Jacobina whole fly Lutzomyia longipalpis cDNA clone NSFM-109h11, mRNA sequence	AM090562	1e-33	143	1	468	1	25%
RAAPBAR014D05.g	blastn	dbESTs_Llongipalpis.fasta	LJGD-L3_H03 Adult female Lutzomyia longipalpis midgut library post blood meal digestion Lutzomyia longipalpis cDNA, mRNA sequence	EW991322	1e-67	254	1	160	2	34%
RAAPBAR014D11.g	blastn	dbESTs_Llongipalpis.fasta	LJGD-L3_H03 Adult female Lutzomyia longipalpis midgut library post blood meal digestion Lutzomyia longipalpis cDNA, mRNA sequence	EW991322	1e-54	212	1	478	3	31%
RAAPBAR014E01.g	blastn	dbESTs_Llongipalpis.fasta	LJGD-L3_H03 Adult female Lutzomyia longipalpis midgut library post blood meal digestion Lutzomyia longipalpis cDNA, mRNA sequence	EW991322	2e-67	254	1	218	1	29%
RAAPBAR014E02.g	blastn	dbESTs_Llongipalpis.fasta	AM093353 Lutzomyia longipalpis Jacobina whole fly Lutzomyia longipalpis cDNA clone NSFM-160f10, mRNA sequence	AM093353	0	898	1	480	1	44%
RAAPBAR014E03.g	blastn	dbESTs_Llongipalpis.fasta	LJGFL_P03_D08 Adult female Lutzomyia longipalpis midgut library blood fed Lutzomyia longipalpis cDNA, mRNA sequence	EW987331	0	720	1	553	1	40%
RAAPBAR014E09.g	blastn	dbESTs_Llongipalpis.fasta	LJGUM-P01_B08 Adult female Lutzomyia longipalpis midgut library sugar fed Lutzomyia longipalpis cDNA, mRNA sequence	EW996013	9e-82	301	1	232	2	34%
RAAPBAR014E10.g	blastn	dbESTs_Llongipalpis.fasta	AM090762 Lutzomyia longipalpis Jacobina whole fly Lutzomyia longipalpis cDNA clone NSFM-141a06, mRNA sequence	AM090762	0	741	1	559	1	42%
RAAPBAR014E11.g	blastn	dbESTs_Llongipalpis.fasta	AM094220 Lutzomyia longipalpis Jacobina whole fly Lutzomyia longipalpis cDNA clone NSFM-34d05, mRNA sequence	AM094220	0	712	1	491	1	47%
RAAPBAR014F06.g	blastn	dbESTs_Llongipalpis.fasta	AM106514 Lutzomyia longipalpis Jacobina whole fly Lutzomyia longipalpis cDNA clone NSFM-64d05, mRNA sequence	AM106514	0	670	1	472	1	43%
RAAPBAR014F11.g	blastn	dbESTs_Llongipalpis.fasta	LJGFIL10_F12 Adult female Lutzomyia longipalpis midgut library blood fed containing Leishmania chagasi Lutzomyia longipalpis cDNA, mRNA sequence	EW989232	1e-134	476	1	432	2	44%
RAAPBAR014G06.g	blastn	dbESTs_Llongipalpis.fasta	AM098521 Lutzomyia longipalpis Jacobina whole fly Lutzomyia longipalpis cDNA clone NSFM-133h06, mRNA sequence	AM098521	3e-46	184	1	406	1	20%
RAAPBAR014G10.g	blastn	dbESTs_Llongipalpis.fasta	LJGUS_P01_D04 Adult female Lutzomyia longipalpis midgut library sugar fed Lutzomyia longipalpis cDNA, mRNA sequence	EW996354	2e-63	240	1	162	4	33%
RAAPBAR014H05.g	blastn	dbESTs_Llongipalpis.fasta	AM096538 Lutzomyia longipalpis Jacobina whole fly Lutzomyia longipalpis cDNA clone NSFM-67h03, mRNA sequence	AM096538	0	676	1	715	1	47%
RAAPBAR014H07.g	blastn	dbESTs_Llongipalpis.fasta	LJGUM-P01_B08 Adult female Lutzomyia longipalpis midgut library sugar fed Lutzomyia longipalpis cDNA, mRNA sequence	EW996013	8e-73	272	1	236	1	33%
RAAPBAR014H11.g	blastn	dbESTs_Llongipalpis.fasta	LJGDIL10_A11 Adult female Lutzomyia longipalpis midgut library post blood meal digestion containing Leishmania chagasi Lutzomyia longipalpis cDNA, mRNA sequence	EW994161	6e-31	133	1	291	2	12%
RAAPBAR014H12.g	blastn	dbESTs_Llongipalpis.fasta	AM095519 Lutzomyia longipalpis Jacobina whole fly Lutzomyia longipalpis cDNA clone NSFM-76e11, mRNA sequence	AM095519	2e-46	184	1	258	1	41%
RAAPBAR015A01.g	blastn	dbESTs_Llongipalpis.fasta	AM105516 Lutzomyia longipalpis Jacobina whole fly Lutzomyia longipalpis cDNA clone NSFM-162h11, mRNA sequence	AM105516	1e-147	521	1	419	1	47%
RAAPBAR015A02.g	blastn	dbESTs_Llongipalpis.fasta	LJGFL_P03_A11 Adult female Lutzomyia longipalpis midgut library blood fed Lutzomyia longipalpis cDNA, mRNA sequence	EW987304	0	638	1	373	1	48%
RAAPBAR015A09.g	blastn	dbESTs_Llongipalpis.fasta	LJGFIL6_C04 Adult female Lutzomyia longipalpis midgut library blood fed containing Leishmania chagasi Lutzomyia longipalpis cDNA, mRNA sequence	EW989575	8e-21	100	1	283	1	40%
RAAPBAR015B04.g	blastn	dbESTs_Llongipalpis.fasta	LJGDIS32_E03 Adult female Lutzomyia longipalpis midgut library post blood meal digestion containing Leishmania chagasi Lutzomyia longipalpis cDNA, mRNA sequence	EW993942	0	676	1	413	1	42%
RAAPBAR015B05.g	blastn	dbESTs_Llongipalpis.fasta	LJGFS_P04_H04 Adult female Lutzomyia longipalpis midgut library blood fed Lutzomyia longipalpis cDNA, mRNA sequence	EW989092	6e-46	182	1	243	1	39%
RAAPBAR015B09.g	blastn	dbESTs_Llongipalpis.fasta	LJGUM-P04_H09 Adult female Lutzomyia longipalpis midgut library sugar fed Lutzomyia longipalpis cDNA, mRNA sequence	EW996314	4e-08	58	1	356	1	30%
RAAPBAR015C02.g	blastn	dbESTs_Llongipalpis.fasta	LJGDIS30_C09 Adult female Lutzomyia longipalpis midgut library post blood meal digestion containing Leishmania chagasi Lutzomyia longipalpis cDNA, mRNA sequence	EW993749	8e-11	66	1	190	1	28%
RAAPBAR015C03.g	blastn	dbESTs_Llongipalpis.fasta	LJGUS_P01_G12 Adult female Lutzomyia longipalpis midgut library sugar fed Lutzomyia longipalpis cDNA, mRNA sequence	EW996396	3e-43	172	1	132	1	40%
RAAPBAR015C04.g	blastn	dbESTs_Llongipalpis.fasta	AM106431 Lutzomyia longipalpis Jacobina whole fly Lutzomyia longipalpis cDNA clone NSFM-110c07, mRNA sequence	AM106431	0	765	1	495	1	45%
RAAPBAR015C05.g	blastn	dbESTs_Llongipalpis.fasta	AM099012 Lutzomyia longipalpis Jacobina whole fly Lutzomyia longipalpis cDNA clone NSFM-81b03, mRNA sequence	AM099012	0	821	1	646	1	46%
RAAPBAR015C07.g	blastn	dbESTs_Llongipalpis.fasta	LJGDIS32_G12 Adult female Lutzomyia longipalpis midgut library post blood meal digestion containing Leishmania chagasi Lutzomyia longipalpis cDNA, mRNA sequence	EW993974	0	662	1	473	1	39%
RAAPBAR015C12.g	blastn	dbESTs_Llongipalpis.fasta	AM093587 Lutzomyia longipalpis Jacobina whole fly Lutzomyia longipalpis cDNA clone NSFM-52g11, mRNA sequence	AM093587	0	747	1	556	2	44%
RAAPBAR015D09.g	blastn	dbESTs_Llongipalpis.fasta	LJGDIM21_F09 Adult female Lutzomyia longipalpis midgut library post blood meal digestion containing Leishmania chagasi Lutzomyia longipalpis cDNA, mRNA sequence	EW993093	2e-07	56	1	411	1	45%
RAAPBAR015F01.g	blastn	dbESTs_Llongipalpis.fasta	AM089779 Lutzomyia longipalpis Jacobina whole fly Lutzomyia longipalpis cDNA clone NSFM-64c06, mRNA sequence	AM089779	1e-109	392	1	254	1	46%
RAAPBAR015F09.g	blastn	dbESTs_Llongipalpis.fasta	LJGUL-P02_G04 Adult female Lutzomyia longipalpis midgut library sugar fed Lutzomyia longipalpis cDNA, mRNA sequence	EW995396	9e-15	80	1	332	1	21%
RAAPBAR015F10.g	blastn	dbESTs_Llongipalpis.fasta	AM094959 Lutzomyia longipalpis Jacobina whole fly Lutzomyia longipalpis cDNA clone NSFM-137d06, mRNA sequence	AM094959	3e-18	92	1	369	1	38%
RAAPBAR015F12.g	blastn	dbESTs_Llongipalpis.fasta	LJGDIL9_E08 Adult female Lutzomyia longipalpis midgut library post blood meal digestion containing Leishmania chagasi Lutzomyia longipalpis cDNA, mRNA sequence	EW994844	8e-06	50	1	340	1	43%
RAAPBAR015G02.g	blastn	dbESTs_Llongipalpis.fasta	LJGFIL6_E03 Adult female Lutzomyia longipalpis midgut library blood fed containing Leishmania chagasi Lutzomyia longipalpis cDNA, mRNA sequence	EW989595	0	918	1	559	2	42%
RAAPBAR015G10.g	blastn	dbESTs_Llongipalpis.fasta	LJGUS_P01_G12 Adult female Lutzomyia longipalpis midgut library sugar fed Lutzomyia longipalpis cDNA, mRNA sequence	EW996396	7e-64	242	1	217	1	31%
RAAPBAR015H04.g	blastn	dbESTs_Llongipalpis.fasta	AM107840 Lutzomyia longipalpis Jacobina whole fly Lutzomyia longipalpis cDNA clone NSFM-117b01, mRNA sequence	AM107840	0	648	1	398	1	23%
RAAPBAR015H07.g	blastn	dbESTs_Llongipalpis.fasta	AM095518 Lutzomyia longipalpis Jacobina whole fly Lutzomyia longipalpis cDNA clone NSFM-76e11, mRNA sequence	AM095518	2e-96	351	1	402	1	47%
RAAPBAR015H09.g	blastn	dbESTs_Llongipalpis.fasta	LJGUM-P04_G01 Adult female Lutzomyia longipalpis midgut library sugar fed Lutzomyia longipalpis cDNA, mRNA sequence	EW996296	3e-26	117	1	241	1	37%
RAAPBAR016A02.g	blastn	dbESTs_Llongipalpis.fasta	LJGUM-P01_B08 Adult female Lutzomyia longipalpis midgut library sugar fed Lutzomyia longipalpis cDNA, mRNA sequence	EW996013	7e-82	301	1	185	6	37%
RAAPBAR016A03.g	blastn	dbESTs_Llongipalpis.fasta	AM090259 Lutzomyia longipalpis Jacobina whole fly Lutzomyia longipalpis cDNA clone SFM-03b11, mRNA sequence	AM090259	1e-150	531	1	626	2	21%
RAAPBAR016A07.g	blastn	dbESTs_Llongipalpis.fasta	LJGFIM23_C03 Adult female Lutzomyia longipalpis midgut library blood fed containing Leishmania chagasi Lutzomyia longipalpis cDNA, mRNA sequence	EW990130	0	656	1	574	8	25%
RAAPBAR016A08.g	blastn	dbESTs_Llongipalpis.fasta	LJGFS_P04_C03 Adult female Lutzomyia longipalpis midgut library blood fed Lutzomyia longipalpis cDNA, mRNA sequence	EW989034	2e-82	303	1	218	1	33%
RAAPBAR016A10.g	blastn	dbESTs_Llongipalpis.fasta	AM097186 Lutzomyia longipalpis Jacobina whole fly Lutzomyia longipalpis cDNA clone SFM-03c10, mRNA sequence	AM097186	1e-84	311	1	252	1	19%
RAAPBAR016A11.g	blastn	dbESTs_Llongipalpis.fasta	LJGDIL1_C11 Adult female Lutzomyia longipalpis midgut library post blood meal digestion containing Leishmania chagasi Lutzomyia longipalpis cDNA, mRNA sequence	EW994096	0	831	1	447	1	47%
RAAPBAR016B01.g	blastn	dbESTs_Llongipalpis.fasta	LJGFIM21_E11 Adult female Lutzomyia longipalpis midgut library blood fed containing Leishmania chagasi Lutzomyia longipalpis cDNA, mRNA sequence	EW990001	3e-46	184	1	468	1	19%
RAAPBAR016B11.g	blastn	dbESTs_Llongipalpis.fasta	AM093069 Lutzomyia longipalpis Jacobina whole fly Lutzomyia longipalpis cDNA clone NSFM-04b01, mRNA sequence	AM093069	0	722	1	546	4	47%
RAAPBAR016D02.g	blastn	dbESTs_Llongipalpis.fasta	LJGFIS33_E09 Adult female Lutzomyia longipalpis midgut library blood fed containing Leishmania chagasi Lutzomyia longipalpis cDNA, mRNA sequence	EW990988	1e-124	444	1	477	1	26%
RAAPBAR016D04.g	blastn	dbESTs_Llongipalpis.fasta	AM100439 Lutzomyia longipalpis Jacobina whole fly Lutzomyia longipalpis cDNA clone NSFM-71b12, mRNA sequence	AM100439	6e-73	272	1	170	1	36%
RAAPBAR016D05.g	blastn	dbESTs_Llongipalpis.fasta	LJGD-L3_H03 Adult female Lutzomyia longipalpis midgut library post blood meal digestion Lutzomyia longipalpis cDNA, mRNA sequence	EW991322	5e-24	109	1	170	1	32%
RAAPBAR016D07.g	blastn	dbESTs_Llongipalpis.fasta	LJGFS_P01_B09 Adult female Lutzomyia longipalpis midgut library blood fed Lutzomyia longipalpis cDNA, mRNA sequence	EW988770	4e-84	309	1	242	1	31%
RAAPBAR016D08.g	blastn	dbESTs_Llongipalpis.fasta	AM093736 Lutzomyia longipalpis Jacobina whole fly Lutzomyia longipalpis cDNA clone NSFM-60e01, mRNA sequence	AM093736	0	698	1	473	1	42%
RAAPBAR016D09.g	blastn	dbESTs_Llongipalpis.fasta	AM102155 Lutzomyia longipalpis Jacobina whole fly Lutzomyia longipalpis cDNA clone NSFM-42g06, mRNA sequence	AM102155	6e-64	242	1	206	1	34%
RAAPBAR016D11.g	blastn	dbESTs_Llongipalpis.fasta	AM106285 Lutzomyia longipalpis Jacobina whole fly Lutzomyia longipalpis cDNA clone NSFM-111c11, mRNA sequence	AM106285	0	650	1	414	4	35%
RAAPBAR016D12.g	blastn	dbESTs_Llongipalpis.fasta	LJGFIM20_E11 Adult female Lutzomyia longipalpis midgut library blood fed containing Leishmania chagasi Lutzomyia longipalpis cDNA, mRNA sequence	EW989922	0	698	1	426	5	41%
RAAPBAR016E03.g	blastn	dbESTs_Llongipalpis.fasta	AM088982 Lutzomyia longipalpis Jacobina whole fly Lutzomyia longipalpis cDNA clone NSFM-162h10, mRNA sequence	AM088982	0	656	1	435	1	34%
RAAPBAR016E05.g	blastn	dbESTs_Llongipalpis.fasta	AM097454 Lutzomyia longipalpis Jacobina whole fly Lutzomyia longipalpis cDNA clone NSFM-64d04, mRNA sequence	AM097454	2e-09	62	1	352	1	43%
RAAPBAR016E07.g	blastn	dbESTs_Llongipalpis.fasta	AM102892 Lutzomyia longipalpis Jacobina whole fly Lutzomyia longipalpis cDNA clone NSFM-36g08, mRNA sequence	AM102892	7e-49	192	1	266	1	30%
RAAPBAR016E10.g	blastn	dbESTs_Llongipalpis.fasta	LJGDIM27_B06 Adult female Lutzomyia longipalpis midgut library post blood meal digestion containing Leishmania chagasi Lutzomyia longipalpis cDNA, mRNA sequence	EW993522	1e-164	577	1	365	1	40%
RAAPBAR016F01.g	blastn	dbESTs_Llongipalpis.fasta	LJGUM-P01_B08 Adult female Lutzomyia longipalpis midgut library sugar fed Lutzomyia longipalpis cDNA, mRNA sequence	EW996013	1e-81	301	1	307	4	35%
RAAPBAR016F06.g	blastn	dbESTs_Llongipalpis.fasta	LJGFL_P02_F06 Adult female Lutzomyia longipalpis midgut library blood fed Lutzomyia longipalpis cDNA, mRNA sequence	EW987273	1e-127	454	1	600	1	34%
RAAPBAR016G08.g	blastn	dbESTs_Llongipalpis.fasta	AM097727 Lutzomyia longipalpis Jacobina whole fly Lutzomyia longipalpis cDNA clone NSFM-19d03, mRNA sequence	AM097727	6e-71	266	1	266	1	26%
RAAPBAR016H01.g	blastn	dbESTs_Llongipalpis.fasta	LJGDIL6_E12 Adult female Lutzomyia longipalpis midgut library post blood meal digestion containing Leishmania chagasi Lutzomyia longipalpis cDNA, mRNA sequence	EW994599	1e-146	517	1	356	1	34%
RAAPBAR016H03.g	blastn	dbESTs_Llongipalpis.fasta	AM106205 Lutzomyia longipalpis Jacobina whole fly Lutzomyia longipalpis cDNA clone NSFM-47e08, mRNA sequence	AM106205	7e-45	178	1	182	1	20%
RAAPBAR016H12.g	blastn	dbESTs_Llongipalpis.fasta	AM095518 Lutzomyia longipalpis Jacobina whole fly Lutzomyia longipalpis cDNA clone NSFM-76e11, mRNA sequence	AM095518	1e-175	613	1	579	3	45%
RAAPBAR017A01.g	blastn	dbESTs_Llongipalpis.fasta	LJGD-L3_H03 Adult female Lutzomyia longipalpis midgut library post blood meal digestion Lutzomyia longipalpis cDNA, mRNA sequence	EW991322	1e-49	194	1	203	1	31%
RAAPBAR017A04.g	blastn	dbESTs_Llongipalpis.fasta	LJGD-L3_H03 Adult female Lutzomyia longipalpis midgut library post blood meal digestion Lutzomyia longipalpis cDNA, mRNA sequence	EW991322	5e-64	242	1	176	4	32%
RAAPBAR017A05.g	blastn	dbESTs_Llongipalpis.fasta	LJGUL-P02_D11 Adult female Lutzomyia longipalpis midgut library sugar fed Lutzomyia longipalpis cDNA, mRNA sequence	EW995374	1e-128	456	1	467	1	42%
RAAPBAR017A11.g	blastn	dbESTs_Llongipalpis.fasta	LJGDIM29_D08 Adult female Lutzomyia longipalpis midgut library post blood meal digestion containing Leishmania chagasi Lutzomyia longipalpis cDNA, mRNA sequence	EW993691	0	690	1	549	1	27%
RAAPBAR017B03.g	blastn	dbESTs_Llongipalpis.fasta	AM099402 Lutzomyia longipalpis Jacobina whole fly Lutzomyia longipalpis cDNA clone NSFM-131h02, mRNA sequence	AM099402	0	821	1	467	1	49%
RAAPBAR017B08.g	blastn	dbESTs_Llongipalpis.fasta	LJGUM-P01_B08 Adult female Lutzomyia longipalpis midgut library sugar fed Lutzomyia longipalpis cDNA, mRNA sequence	EW996013	1e-22	105	1	210	1	41%
RAAPBAR017B09.g	blastn	dbESTs_Llongipalpis.fasta	AM102149 Lutzomyia longipalpis Jacobina whole fly Lutzomyia longipalpis cDNA clone NSFM-152h08, mRNA sequence	AM102149	3e-12	72	1	377	1	25%
RAAPBAR017B11.g	blastn	dbESTs_Llongipalpis.fasta	LJGU-L-8_A07 Adult female Lutzomyia longipalpis midgut library sugar fed Lutzomyia longipalpis cDNA, mRNA sequence	EW995138	0	920	1	594	2	46%
RAAPBAR017C01.g	blastn	dbESTs_Llongipalpis.fasta	LJGUS_P03_G04 Adult female Lutzomyia longipalpis midgut library sugar fed Lutzomyia longipalpis cDNA, mRNA sequence	EW996569	6e-36	149	1	174	1	37%
RAAPBAR017C02.g	blastn	dbESTs_Llongipalpis.fasta	LJGDIL2_E04 Adult female Lutzomyia longipalpis midgut library post blood meal digestion containing Leishmania chagasi Lutzomyia longipalpis cDNA, mRNA sequence	EW994277	1e-82	305	1	547	2	37%
RAAPBAR017C03.g	blastn	dbESTs_Llongipalpis.fasta	AM107303 Lutzomyia longipalpis Jacobina whole fly Lutzomyia longipalpis cDNA clone NSFM-83g04, mRNA sequence	AM107303	6e-71	266	1	253	1	27%
RAAPBAR017D08.g	blastn	dbESTs_Llongipalpis.fasta	AM109501 Lutzomyia longipalpis Jacobina whole fly Lutzomyia longipalpis cDNA clone NSFM-142c03, mRNA sequence	AM109501	0	636	1	684	4	37%
RAAPBAR017D09.g	blastn	dbESTs_Llongipalpis.fasta	AM101172 Lutzomyia longipalpis Jacobina whole fly Lutzomyia longipalpis cDNA clone NSFM-59g11, mRNA sequence	AM101172	2e-31	135	1	333	1	38%
RAAPBAR017E01.g	blastn	dbESTs_Llongipalpis.fasta	AM093976 Lutzomyia longipalpis Jacobina whole fly Lutzomyia longipalpis cDNA clone NSFM-39a01, mRNA sequence	AM093976	3e-72	270	1	202	1	22%
RAAPBAR017E03.g	blastn	dbESTs_Llongipalpis.fasta	AM097223 Lutzomyia longipalpis Jacobina whole fly Lutzomyia longipalpis cDNA clone NSFM-113g10, mRNA sequence	AM097223	1e-179	626	1	434	1	42%
RAAPBAR017E05.g	blastn	dbESTs_Llongipalpis.fasta	AM095473 Lutzomyia longipalpis Jacobina whole fly Lutzomyia longipalpis cDNA clone NSFM-77e05, mRNA sequence	AM095473	1e-12	74	1	566	1	41%
RAAPBAR017E06.g	blastn	dbESTs_Llongipalpis.fasta	AM098836 Lutzomyia longipalpis Jacobina whole fly Lutzomyia longipalpis cDNA clone SFM-03e05, mRNA sequence	AM098836	6e-70	262	1	191	1	25%
RAAPBAR017E08.g	blastn	dbESTs_Llongipalpis.fasta	AM091967 Lutzomyia longipalpis Jacobina whole fly Lutzomyia longipalpis cDNA clone NSFM-114f08, mRNA sequence	AM091967	1e-167	587	1	565	1	38%
RAAPBAR017F03.g	blastn	dbESTs_Llongipalpis.fasta	AM107436 Lutzomyia longipalpis Jacobina whole fly Lutzomyia longipalpis cDNA clone NSFM-120c10, mRNA sequence	AM107436	2e-44	178	1	373	1	25%
RAAPBAR017F07.g	blastn	dbESTs_Llongipalpis.fasta	AM108719 Lutzomyia longipalpis Jacobina whole fly Lutzomyia longipalpis cDNA clone NSFM-13e02, mRNA sequence	AM108719	0	787	1	618	3	45%
RAAPBAR017G02.g	blastn	dbESTs_Llongipalpis.fasta	AM106272 Lutzomyia longipalpis Jacobina whole fly Lutzomyia longipalpis cDNA clone NSFM-29d02, mRNA sequence	AM106272	0	795	1	539	1	44%
RAAPBAR017G03.g	blastn	dbESTs_Llongipalpis.fasta	LJGU-L-5_D03 Adult female Lutzomyia longipalpis midgut library sugar fed Lutzomyia longipalpis cDNA, mRNA sequence	EW994958	3e-88	323	1	242	1	38%
RAAPBAR017H03.g	blastn	dbESTs_Llongipalpis.fasta	AM096655 Lutzomyia longipalpis Jacobina whole fly Lutzomyia longipalpis cDNA clone NSFM-70c05, mRNA sequence	AM096655	0	793	1	464	1	48%
RAAPBAR017H05.g	blastn	dbESTs_Llongipalpis.fasta	LJGFM10_H06 Adult female Lutzomyia longipalpis midgut library blood fed Lutzomyia longipalpis cDNA, mRNA sequence	EW987988	1e-162	569	1	374	1	45%
RAAPBAR017H06.g	blastn	dbESTs_Llongipalpis.fasta	AM096618 Lutzomyia longipalpis Jacobina whole fly Lutzomyia longipalpis cDNA clone NSFM-159d08, mRNA sequence	AM096618	0	718	1	614	1	42%
RAAPBAR017H07.g	blastn	dbESTs_Llongipalpis.fasta	LJGDM26_E10 Adult female Lutzomyia longipalpis midgut library post blood meal digestion Lutzomyia longipalpis cDNA, mRNA sequence	EW992330	0	954	1	557	1	47%
RAAPBAR017H12.g	blastn	dbESTs_Llongipalpis.fasta	LJGFIL1_E11 Adult female Lutzomyia longipalpis midgut library blood fed containing Leishmania chagasi Lutzomyia longipalpis cDNA, mRNA sequence	EW989144	1e-135	478	1	245	1	48%
RAAPBAR018A03.g	blastn	dbESTs_Llongipalpis.fasta	AM104070 Lutzomyia longipalpis Jacobina whole fly Lutzomyia longipalpis cDNA clone NSFM-115e05, mRNA sequence	AM104070	1e-93	341	1	285	1	34%
RAAPBAR018A04.g	blastn	dbESTs_Llongipalpis.fasta	AM102190 Lutzomyia longipalpis Jacobina whole fly Lutzomyia longipalpis cDNA clone NSFM-28a04, mRNA sequence	AM102190	1e-159	561	1	505	1	44%
RAAPBAR018A06.g	blastn	dbESTs_Llongipalpis.fasta	AM090484 Lutzomyia longipalpis Jacobina whole fly Lutzomyia longipalpis cDNA clone NSFM-13b01, mRNA sequence	AM090484	0	716	1	415	1	45%
RAAPBAR018B07.g	blastn	dbESTs_Llongipalpis.fasta	AM090912 Lutzomyia longipalpis Jacobina whole fly Lutzomyia longipalpis cDNA clone SFM-05h09, mRNA sequence	AM090912	0	805	1	515	1	45%
RAAPBAR018B10.g	blastn	dbESTs_Llongipalpis.fasta	AM109374 Lutzomyia longipalpis Jacobina whole fly Lutzomyia longipalpis cDNA clone NSFM-124b12, mRNA sequence	AM109374	3e-72	270	1	203	1	28%
RAAPBAR018B12.g	blastn	dbESTs_Llongipalpis.fasta	AM096259 Lutzomyia longipalpis Jacobina whole fly Lutzomyia longipalpis cDNA clone NSFM-156b06, mRNA sequence	AM096259	2e-11	70	1	580	1	49%
RAAPBAR018C02.g	blastn	dbESTs_Llongipalpis.fasta	LJGFIL4_F04 Adult female Lutzomyia longipalpis midgut library blood fed containing Leishmania chagasi Lutzomyia longipalpis cDNA, mRNA sequence	EW989454	0	731	1	651	1	45%
RAAPBAR018C04.g	blastn	dbESTs_Llongipalpis.fasta	AM106863 Lutzomyia longipalpis Jacobina whole fly Lutzomyia longipalpis cDNA clone NSFM-130d04, mRNA sequence	AM106863	1e-100	365	1	345	1	27%
RAAPBAR018C05.g	blastn	dbESTs_Llongipalpis.fasta	AM106375 Lutzomyia longipalpis Jacobina whole fly Lutzomyia longipalpis cDNA clone NSFM-05e07, mRNA sequence	AM106375	7e-47	186	1	395	1	21%
RAAPBAR018C06.g	blastn	dbESTs_Llongipalpis.fasta	LJGFIM23_H05 Adult female Lutzomyia longipalpis midgut library blood fed containing Leishmania chagasi Lutzomyia longipalpis cDNA, mRNA sequence	EW990187	0	753	1	453	1	45%
RAAPBAR018C07.g	blastn	dbESTs_Llongipalpis.fasta	LJGD-L4_C11 Adult female Lutzomyia longipalpis midgut library post blood meal digestion Lutzomyia longipalpis cDNA, mRNA sequence	EW991354	4e-53	206	1	246	1	29%
RAAPBAR018C09.g	blastn	dbESTs_Llongipalpis.fasta	LJGFIL6_D01 Adult female Lutzomyia longipalpis midgut library blood fed containing Leishmania chagasi Lutzomyia longipalpis cDNA, mRNA sequence	EW989583	1e-39	163	1	432	1	20%
RAAPBAR018C10.g	blastn	dbESTs_Llongipalpis.fasta	AM089047 Lutzomyia longipalpis Jacobina whole fly Lutzomyia longipalpis cDNA clone NSFM-46d08, mRNA sequence	AM089047	6e-84	309	1	340	1	24%
RAAPBAR018D02.g	blastn	dbESTs_Llongipalpis.fasta	LJGD-L3_H03 Adult female Lutzomyia longipalpis midgut library post blood meal digestion Lutzomyia longipalpis cDNA, mRNA sequence	EW991322	1e-09	62	1	196	1	27%
RAAPBAR018D03.g	blastn	dbESTs_Llongipalpis.fasta	LJGDIS31_D02 Adult female Lutzomyia longipalpis midgut library post blood meal digestion containing Leishmania chagasi Lutzomyia longipalpis cDNA, mRNA sequence	EW993844	0	809	1	569	1	48%
RAAPBAR018D04.g	blastn	dbESTs_Llongipalpis.fasta	AM106339 Lutzomyia longipalpis Jacobina whole fly Lutzomyia longipalpis cDNA clone NSFM-153g06, mRNA sequence	AM106339	0	852	1	514	1	43%
RAAPBAR018D06.g	blastn	dbESTs_Llongipalpis.fasta	LJGDM33_A09 Adult female Lutzomyia longipalpis midgut library post blood meal digestion Lutzomyia longipalpis cDNA, mRNA sequence	EW992882	0	1156	1	631	2	52%
RAAPBAR018D09.g	blastn	dbESTs_Llongipalpis.fasta	AM094499 Lutzomyia longipalpis Jacobina whole fly Lutzomyia longipalpis cDNA clone NSFM-89c09, mRNA sequence	AM094499	1e-149	527	1	494	1	34%
RAAPBAR018E04.g	blastn	dbESTs_Llongipalpis.fasta	AM090131 Lutzomyia longipalpis Jacobina whole fly Lutzomyia longipalpis cDNA clone NSFM-18a01, mRNA sequence	AM090131	0	785	1	547	1	39%
RAAPBAR018E05.g	blastn	dbESTs_Llongipalpis.fasta	LJGFIL10_G03 Adult female Lutzomyia longipalpis midgut library blood fed containing Leishmania chagasi Lutzomyia longipalpis cDNA, mRNA sequence	EW989235	5e-20	98	1	407	1	30%
RAAPBAR018E07.g	blastn	dbESTs_Llongipalpis.fasta	AM093716 Lutzomyia longipalpis Jacobina whole fly Lutzomyia longipalpis cDNA clone NSFM-139f10, mRNA sequence	AM093716	0	854	1	604	3	40%
RAAPBAR018F01.g	blastn	dbESTs_Llongipalpis.fasta	LJGF-L-5_E11 Adult female Lutzomyia longipalpis midgut library blood fed Lutzomyia longipalpis cDNA, mRNA sequence	EW987579	0	634	1	411	4	42%
RAAPBAR018F11.g	blastn	dbESTs_Llongipalpis.fasta	AM101672 Lutzomyia longipalpis Jacobina whole fly Lutzomyia longipalpis cDNA clone NSFM-32c02, mRNA sequence	AM101672	0	789	1	684	2	40%
RAAPBAR018G11.g	blastn	dbESTs_Llongipalpis.fasta	AM089624 Lutzomyia longipalpis Jacobina whole fly Lutzomyia longipalpis cDNA clone NSFM-165e06, mRNA sequence	AM089624	2e-90	331	1	456	1	45%
RAAPBAR018G12.g	blastn	dbESTs_Llongipalpis.fasta	AM095070 Lutzomyia longipalpis Jacobina whole fly Lutzomyia longipalpis cDNA clone NSFM-137b07, mRNA sequence	AM095070	8e-37	153	1	343	1	24%
RAAPBAR018H07.g	blastn	dbESTs_Llongipalpis.fasta	LJGDM25_A11 Adult female Lutzomyia longipalpis midgut library post blood meal digestion Lutzomyia longipalpis cDNA, mRNA sequence	EW992207	2e-52	204	1	349	1	23%
RAAPBAR018H10.g	blastn	dbESTs_Llongipalpis.fasta	AM099121 Lutzomyia longipalpis Jacobina whole fly Lutzomyia longipalpis cDNA clone NSFM-33f07, mRNA sequence	AM099121	1e-144	509	1	504	1	33%
RAAPBAR019B05.g	blastn	dbESTs_Llongipalpis.fasta	LJGDM29_B01 Adult female Lutzomyia longipalpis midgut library post blood meal digestion Lutzomyia longipalpis cDNA, mRNA sequence	EW992536	0	731	1	422	1	47%
RAAPBAR019C04.g	blastn	dbESTs_Llongipalpis.fasta	AM096628 Lutzomyia longipalpis Jacobina whole fly Lutzomyia longipalpis cDNA clone NSFM-24g07, mRNA sequence	AM096628	0	632	1	547	1	50%
RAAPBAR019C06.g	blastn	dbESTs_Llongipalpis.fasta	LJGD-L4_B08 Adult female Lutzomyia longipalpis midgut library post blood meal digestion Lutzomyia longipalpis cDNA, mRNA sequence	EW991342	1e-33	143	1	453	1	25%
RAAPBAR019C07.g	blastn	dbESTs_Llongipalpis.fasta	LJGFIM22_B09 Adult female Lutzomyia longipalpis midgut library blood fed containing Leishmania chagasi Lutzomyia longipalpis cDNA, mRNA sequence	EW990050	2e-06	52	1	284	1	42%
RAAPBAR019C09.g	blastn	dbESTs_Llongipalpis.fasta	LJGDIM27_B11 Adult female Lutzomyia longipalpis midgut library post blood meal digestion containing Leishmania chagasi Lutzomyia longipalpis cDNA, mRNA sequence	EW993526	0	842	1	630	3	53%
RAAPBAR019C10.g	blastn	dbESTs_Llongipalpis.fasta	LJGFL_P04_E05 Adult female Lutzomyia longipalpis midgut library blood fed Lutzomyia longipalpis cDNA, mRNA sequence	EW987413	8e-37	153	1	348	1	23%
RAAPBAR019D12.g	blastn	dbESTs_Llongipalpis.fasta	LJGUM-P01_H12 Adult female Lutzomyia longipalpis midgut library sugar fed Lutzomyia longipalpis cDNA, mRNA sequence	EW996082	0	638	1	545	2	46%
RAAPBAR019E01.g	blastn	dbESTs_Llongipalpis.fasta	LJGD-L3_H03 Adult female Lutzomyia longipalpis midgut library post blood meal digestion Lutzomyia longipalpis cDNA, mRNA sequence	EW991322	1e-54	212	1	455	1	34%
RAAPBAR019E04.g	blastn	dbESTs_Llongipalpis.fasta	LJGD-L3_E07 Adult female Lutzomyia longipalpis midgut library post blood meal digestion Lutzomyia longipalpis cDNA, mRNA sequence	EW991302	0	981	1	574	1	41%
RAAPBAR019E08.g	blastn	dbESTs_Llongipalpis.fasta	AM106863 Lutzomyia longipalpis Jacobina whole fly Lutzomyia longipalpis cDNA clone NSFM-130d04, mRNA sequence	AM106863	1e-104	377	1	340	3	27%
RAAPBAR019F02.g	blastn	dbESTs_Llongipalpis.fasta	LJGDIL9_D03 Adult female Lutzomyia longipalpis midgut library post blood meal digestion containing Leishmania chagasi Lutzomyia longipalpis cDNA, mRNA sequence	EW994830	0	775	1	456	1	46%
RAAPBAR019F04.g	blastn	dbESTs_Llongipalpis.fasta	LJGDM22_D08 Adult female Lutzomyia longipalpis midgut library post blood meal digestion Lutzomyia longipalpis cDNA, mRNA sequence	EW991991	1e-135	480	1	324	1	33%
RAAPBAR019F06.g	blastn	dbESTs_Llongipalpis.fasta	AM108967 Lutzomyia longipalpis Jacobina whole fly Lutzomyia longipalpis cDNA clone NSFM-11b10, mRNA sequence	AM108967	0	1070	1	602	2	54%
RAAPBAR019F09.g	blastn	dbESTs_Llongipalpis.fasta	AM105515 Lutzomyia longipalpis Jacobina whole fly Lutzomyia longipalpis cDNA clone NSFM-122g08, mRNA sequence	AM105515	3e-15	82	1	458	1	37%
RAAPBAR019F11.g	blastn	dbESTs_Llongipalpis.fasta	AM090641 Lutzomyia longipalpis Jacobina whole fly Lutzomyia longipalpis cDNA clone NSFM-57f08, mRNA sequence	AM090641	1e-166	583	1	570	1	48%
RAAPBAR019G01.g	blastn	dbESTs_Llongipalpis.fasta	AM092341 Lutzomyia longipalpis Jacobina whole fly Lutzomyia longipalpis cDNA clone NSFM-36d11, mRNA sequence	AM092341	0	934	1	595	1	48%
RAAPBAR019G12.g	blastn	dbESTs_Llongipalpis.fasta	AM096470 Lutzomyia longipalpis Jacobina whole fly Lutzomyia longipalpis cDNA clone NSFM-69c07, mRNA sequence	AM096470	8e-97	353	1	648	1	25%
RAAPBAR019H01.g	blastn	dbESTs_Llongipalpis.fasta	LJGFS_P03_B10 Adult female Lutzomyia longipalpis midgut library blood fed Lutzomyia longipalpis cDNA, mRNA sequence	EW988942	3e-06	52	1	405	1	20%
RAAPBAR019H04.g	blastn	dbESTs_Llongipalpis.fasta	AM095728 Lutzomyia longipalpis Jacobina whole fly Lutzomyia longipalpis cDNA clone NSFM-94e03, mRNA sequence	AM095728	2e-31	135	1	389	1	31%
RAAPBAR019H06.g	blastn	dbESTs_Llongipalpis.fasta	AM095385 Lutzomyia longipalpis Jacobina whole fly Lutzomyia longipalpis cDNA clone NSFM-71e10, mRNA sequence	AM095385	1e-143	505	1	511	1	35%
RAAPBAR019H10.g	blastn	dbESTs_Llongipalpis.fasta	AM093193 Lutzomyia longipalpis Jacobina whole fly Lutzomyia longipalpis cDNA clone NSFM-01f03, mRNA sequence	AM093193	3e-27	121	1	370	1	18%
RAAPBAR019H12.g	blastn	dbESTs_Llongipalpis.fasta	LJGFIM22_E03 Adult female Lutzomyia longipalpis midgut library blood fed containing Leishmania chagasi Lutzomyia longipalpis cDNA, mRNA sequence	EW990074	1e-114	408	1	345	2	37%
RAAPBAR020A04.g	blastn	dbESTs_Llongipalpis.fasta	LJGDM29_B06 Adult female Lutzomyia longipalpis midgut library post blood meal digestion Lutzomyia longipalpis cDNA, mRNA sequence	EW992541	5e-40	163	1	228	1	21%
RAAPBAR020A05.g	blastn	dbESTs_Llongipalpis.fasta	AM105990 Lutzomyia longipalpis Jacobina whole fly Lutzomyia longipalpis cDNA clone NSFM-87b07, mRNA sequence	AM105990	1e-180	628	1	454	1	43%
RAAPBAR020A06.g	blastn	dbESTs_Llongipalpis.fasta	AM096041 Lutzomyia longipalpis Jacobina whole fly Lutzomyia longipalpis cDNA clone NSFM-154c10, mRNA sequence	AM096041	1e-149	525	1	362	1	43%
RAAPBAR020B05.g	blastn	dbESTs_Llongipalpis.fasta	LJGFM8_H08 Adult female Lutzomyia longipalpis midgut library blood fed Lutzomyia longipalpis cDNA, mRNA sequence	EW988309	0	848	1	518	3	44%
RAAPBAR020B06.g	blastn	dbESTs_Llongipalpis.fasta	LJGFM10_A05 Adult female Lutzomyia longipalpis midgut library blood fed Lutzomyia longipalpis cDNA, mRNA sequence	EW987905	0	846	1	577	1	38%
RAAPBAR020B09.g	blastn	dbESTs_Llongipalpis.fasta	LJGDIM23_D09 Adult female Lutzomyia longipalpis midgut library post blood meal digestion containing Leishmania chagasi Lutzomyia longipalpis cDNA, mRNA sequence	EW993242	0	660	1	546	1	45%
RAAPBAR020B10.g	blastn	dbESTs_Llongipalpis.fasta	LJGDIL4_D01 Adult female Lutzomyia longipalpis midgut library post blood meal digestion containing Leishmania chagasi Lutzomyia longipalpis cDNA, mRNA sequence	EW994423	8e-12	70	1	291	1	37%
RAAPBAR020C04.g	blastn	dbESTs_Llongipalpis.fasta	AM096853 Lutzomyia longipalpis Jacobina whole fly Lutzomyia longipalpis cDNA clone NSFM-133c09, mRNA sequence	AM096853	0	896	1	546	1	46%
RAAPBAR020C06.g	blastn	dbESTs_Llongipalpis.fasta	LJGUM-P01_B08 Adult female Lutzomyia longipalpis midgut library sugar fed Lutzomyia longipalpis cDNA, mRNA sequence	EW996013	9e-85	311	1	231	2	34%
RAAPBAR020C08.g	blastn	dbESTs_Llongipalpis.fasta	LJGD-L3_H03 Adult female Lutzomyia longipalpis midgut library post blood meal digestion Lutzomyia longipalpis cDNA, mRNA sequence	EW991322	1e-64	244	1	180	2	32%
RAAPBAR020D08.g	blastn	dbESTs_Llongipalpis.fasta	AM089630 Lutzomyia longipalpis Jacobina whole fly Lutzomyia longipalpis cDNA clone NSFM-82e08, mRNA sequence	AM089630	1e-169	595	1	599	3	47%
RAAPBAR020D09.g	blastn	dbESTs_Llongipalpis.fasta	LJGDIS32_G12 Adult female Lutzomyia longipalpis midgut library post blood meal digestion containing Leishmania chagasi Lutzomyia longipalpis cDNA, mRNA sequence	EW993974	0	692	1	481	1	38%
RAAPBAR020D12.g	blastn	dbESTs_Llongipalpis.fasta	AM099670 Lutzomyia longipalpis Jacobina whole fly Lutzomyia longipalpis cDNA clone NSFM-95c01, mRNA sequence	AM099670	0	682	1	585	1	47%
RAAPBAR020E08.g	blastn	dbESTs_Llongipalpis.fasta	AM102856 Lutzomyia longipalpis Jacobina whole fly Lutzomyia longipalpis cDNA clone NSFM-134h05, mRNA sequence	AM102856	8e-09	60	1	302	1	51%
RAAPBAR020E12.g	blastn	dbESTs_Llongipalpis.fasta	LJGFIM20_B09 Adult female Lutzomyia longipalpis midgut library blood fed containing Leishmania chagasi Lutzomyia longipalpis cDNA, mRNA sequence	EW989888	0	906	1	621	1	49%
RAAPBAR020F08.g	blastn	dbESTs_Llongipalpis.fasta	LJGDM27_A10 Adult female Lutzomyia longipalpis midgut library post blood meal digestion Lutzomyia longipalpis cDNA, mRNA sequence	EW992369	1e-143	507	1	496	1	36%
RAAPBAR020F09.g	blastn	dbESTs_Llongipalpis.fasta	AM099483 Lutzomyia longipalpis Jacobina whole fly Lutzomyia longipalpis cDNA clone NSFM-153g03, mRNA sequence	AM099483	0	993	1	611	1	40%
RAAPBAR020F10.g	blastn	dbESTs_Llongipalpis.fasta	AM093860 Lutzomyia longipalpis Jacobina whole fly Lutzomyia longipalpis cDNA clone NSFM-139e01, mRNA sequence	AM093860	1e-116	416	1	370	1	28%
RAAPBAR020G01.g	blastn	dbESTs_Llongipalpis.fasta	AM090222 Lutzomyia longipalpis Jacobina whole fly Lutzomyia longipalpis cDNA clone NSFM-23e09, mRNA sequence	AM090222	4e-36	151	1	405	1	19%
RAAPBAR020G02.g	blastn	dbESTs_Llongipalpis.fasta	LJGU-L-6_D03 Adult female Lutzomyia longipalpis midgut library sugar fed Lutzomyia longipalpis cDNA, mRNA sequence	EW995031	4e-68	256	1	195	1	43%
RAAPBAR020G03.g	blastn	dbESTs_Llongipalpis.fasta	LJGFIM23_G11 Adult female Lutzomyia longipalpis midgut library blood fed containing Leishmania chagasi Lutzomyia longipalpis cDNA, mRNA sequence	EW990181	1e-103	373	1	222	1	34%
RAAPBAR020G04.g	blastn	dbESTs_Llongipalpis.fasta	LJGD-L4_E03 Adult female Lutzomyia longipalpis midgut library post blood meal digestion Lutzomyia longipalpis cDNA, mRNA sequence	EW991369	1e-180	630	1	578	1	39%
RAAPBAR020G07.g	blastn	dbESTs_Llongipalpis.fasta	LJGDIM22_G08 Adult female Lutzomyia longipalpis midgut library post blood meal digestion containing Leishmania chagasi Lutzomyia longipalpis cDNA, mRNA sequence	EW993183	1e-06	52	1	234	1	34%
RAAPBAR020G08.g	blastn	dbESTs_Llongipalpis.fasta	LJGD-L3_H03 Adult female Lutzomyia longipalpis midgut library post blood meal digestion Lutzomyia longipalpis cDNA, mRNA sequence	EW991322	2e-45	180	1	248	1	30%
RAAPBAR020G12.g	blastn	dbESTs_Llongipalpis.fasta	LJGF-L-8_F03 Adult female Lutzomyia longipalpis midgut library blood fed Lutzomyia longipalpis cDNA, mRNA sequence	EW987797	0	751	1	524	1	42%
RAAPBAR020H01.g	blastn	dbESTs_Llongipalpis.fasta	AM102346 Lutzomyia longipalpis Jacobina whole fly Lutzomyia longipalpis cDNA clone NSFM-153b11, mRNA sequence	AM102346	0	803	1	521	1	42%
RAAPBAR020H02.g	blastn	dbESTs_Llongipalpis.fasta	AM094119 Lutzomyia longipalpis Jacobina whole fly Lutzomyia longipalpis cDNA clone NSFM-04e01, mRNA sequence	AM094119	1e-43	174	1	167	1	34%
RAAPBAR020H05.g	blastn	dbESTs_Llongipalpis.fasta	LJGFM10_D08 Adult female Lutzomyia longipalpis midgut library blood fed Lutzomyia longipalpis cDNA, mRNA sequence	EW987942	1e-38	159	1	314	1	26%
RAAPBAR020H06.g	blastn	dbESTs_Llongipalpis.fasta	AM101412 Lutzomyia longipalpis Jacobina whole fly Lutzomyia longipalpis cDNA clone NSFM-125a11, mRNA sequence	AM101412	0	650	1	415	1	32%
RAAPBAR020H11.g	blastn	dbESTs_Llongipalpis.fasta	AM094123 Lutzomyia longipalpis Jacobina whole fly Lutzomyia longipalpis cDNA clone NSFM-02d06, mRNA sequence	AM094123	5e-96	349	1	287	1	37%
RAAPBAR021A11.g	blastn	dbESTs_Llongipalpis.fasta	AM109451 Lutzomyia longipalpis Jacobina whole fly Lutzomyia longipalpis cDNA clone NSFM-163c03, mRNA sequence	AM109451	0	1237	1	771	2	52%
RAAPBAR021A12.g	blastn	dbESTs_Llongipalpis.fasta	LJGU-M-5_F07 Adult female Lutzomyia longipalpis midgut library sugar fed Lutzomyia longipalpis cDNA, mRNA sequence	EW995654	0	801	1	522	1	47%
RAAPBAR021B01.g	blastn	dbESTs_Llongipalpis.fasta	AM089436 Lutzomyia longipalpis Jacobina whole fly Lutzomyia longipalpis cDNA clone NSFM-40d12, mRNA sequence	AM089436	1e-153	539	1	503	1	41%
RAAPBAR021B05.g	blastn	dbESTs_Llongipalpis.fasta	AM095511 Lutzomyia longipalpis Jacobina whole fly Lutzomyia longipalpis cDNA clone NSFM-77c07, mRNA sequence	AM095511	8e-65	246	1	397	1	42%
RAAPBAR021B09.g	blastn	dbESTs_Llongipalpis.fasta	AM093382 Lutzomyia longipalpis Jacobina whole fly Lutzomyia longipalpis cDNA clone NSFM-161c11, mRNA sequence	AM093382	0	831	1	804	2	39%
RAAPBAR021B11.g	blastn	dbESTs_Llongipalpis.fasta	AM102607 Lutzomyia longipalpis Jacobina whole fly Lutzomyia longipalpis cDNA clone NSFM-133h05, mRNA sequence	AM102607	1e-20	100	1	383	1	36%
RAAPBAR021C03.g	blastn	dbESTs_Llongipalpis.fasta	LJGFM6_E11 Adult female Lutzomyia longipalpis midgut library blood fed Lutzomyia longipalpis cDNA, mRNA sequence	EW988137	2e-57	220	1	168	1	32%
RAAPBAR021C06.g	blastn	dbESTs_Llongipalpis.fasta	AM103672 Lutzomyia longipalpis Jacobina whole fly Lutzomyia longipalpis cDNA clone NSFM-32b09, mRNA sequence	AM103672	8e-27	119	1	262	1	30%
RAAPBAR021C09.g	blastn	dbESTs_Llongipalpis.fasta	LJGUM-P01_B08 Adult female Lutzomyia longipalpis midgut library sugar fed Lutzomyia longipalpis cDNA, mRNA sequence	EW996013	4e-84	309	1	217	1	34%
RAAPBAR021C10.g	blastn	dbESTs_Llongipalpis.fasta	LJGFIM28_H03 Adult female Lutzomyia longipalpis midgut library blood fed containing Leishmania chagasi Lutzomyia longipalpis cDNA, mRNA sequence	EW990598	2e-81	301	1	577	1	50%
RAAPBAR021D02.g	blastn	dbESTs_Llongipalpis.fasta	AM103101 Lutzomyia longipalpis Jacobina whole fly Lutzomyia longipalpis cDNA clone NSFM-113c02, mRNA sequence	AM103101	0	634	1	437	1	40%
RAAPBAR021D07.g	blastn	dbESTs_Llongipalpis.fasta	AM102721 Lutzomyia longipalpis Jacobina whole fly Lutzomyia longipalpis cDNA clone NSFM-10e12, mRNA sequence	AM102721	1e-121	432	1	245	1	44%
RAAPBAR021D10.g	blastn	dbESTs_Llongipalpis.fasta	LJGFIL5_C03 Adult female Lutzomyia longipalpis midgut library blood fed containing Leishmania chagasi Lutzomyia longipalpis cDNA, mRNA sequence	EW989496	0	650	1	389	1	35%
RAAPBAR021D12.g	blastn	dbESTs_Llongipalpis.fasta	LJGFM-P03_H09 Adult female Lutzomyia longipalpis midgut library blood fed Lutzomyia longipalpis cDNA, mRNA sequence	EW988671	1e-57	222	1	348	1	31%
RAAPBAR021E12.g	blastn	dbESTs_Llongipalpis.fasta	AM105395 Lutzomyia longipalpis Jacobina whole fly Lutzomyia longipalpis cDNA clone NSFM-113b07, mRNA sequence	AM105395	0	866	1	579	1	37%
RAAPBAR021F12.g	blastn	dbESTs_Llongipalpis.fasta	LJGFIM22_E02 Adult female Lutzomyia longipalpis midgut library blood fed containing Leishmania chagasi Lutzomyia longipalpis cDNA, mRNA sequence	EW990073	2e-40	165	1	358	1	28%
RAAPBAR021G01.g	blastn	dbESTs_Llongipalpis.fasta	LJGU-L-7_C06 Adult female Lutzomyia longipalpis midgut library sugar fed Lutzomyia longipalpis cDNA, mRNA sequence	EW995090	2e-37	155	1	279	1	29%
RAAPBAR021G06.g	blastn	dbESTs_Llongipalpis.fasta	AM092851 Lutzomyia longipalpis Jacobina whole fly Lutzomyia longipalpis cDNA clone NSFM-158h03, mRNA sequence	AM092851	0	773	1	595	1	53%
RAAPBAR021G12.g	blastn	dbESTs_Llongipalpis.fasta	AM093065 Lutzomyia longipalpis Jacobina whole fly Lutzomyia longipalpis cDNA clone NSFM-45f10, mRNA sequence	AM093065	1e-47	188	1	354	1	30%
RAAPBAR021H04.g	blastn	dbESTs_Llongipalpis.fasta	AM101428 Lutzomyia longipalpis Jacobina whole fly Lutzomyia longipalpis cDNA clone NSFM-31f03, mRNA sequence	AM101428	0	650	1	639	1	43%
RAAPBAR021H12.g	blastn	dbESTs_Llongipalpis.fasta	LJGFS_P01_B09 Adult female Lutzomyia longipalpis midgut library blood fed Lutzomyia longipalpis cDNA, mRNA sequence	EW988770	9e-82	301	1	233	1	33%
RAAPBAR022A01.g	blastn	dbESTs_Llongipalpis.fasta	AM089554 Lutzomyia longipalpis Jacobina whole fly Lutzomyia longipalpis cDNA clone NSFM-20f02, mRNA sequence	AM089554	8e-27	119	1	261	1	27%
RAAPBAR022A05.g	blastn	dbESTs_Llongipalpis.fasta	LJGDIL6_F07 Adult female Lutzomyia longipalpis midgut library post blood meal digestion containing Leishmania chagasi Lutzomyia longipalpis cDNA, mRNA sequence	EW994603	2e-63	242	1	645	2	33%
RAAPBAR022A06.g	blastn	dbESTs_Llongipalpis.fasta	AM109471 Lutzomyia longipalpis Jacobina whole fly Lutzomyia longipalpis cDNA clone NSFM-10e02, mRNA sequence	AM109471	2e-29	129	1	589	1	47%
RAAPBAR022A07.g	blastn	dbESTs_Llongipalpis.fasta	AM090225 Lutzomyia longipalpis Jacobina whole fly Lutzomyia longipalpis cDNA clone NSFM-45g01, mRNA sequence	AM090225	1e-106	383	1	325	2	25%
RAAPBAR022A09.g	blastn	dbESTs_Llongipalpis.fasta	AM094289 Lutzomyia longipalpis Jacobina whole fly Lutzomyia longipalpis cDNA clone NSFM-57g08, mRNA sequence	AM094289	0	1217	1	904	2	38%
RAAPBAR022B03.g	blastn	dbESTs_Llongipalpis.fasta	AM092063 Lutzomyia longipalpis Jacobina whole fly Lutzomyia longipalpis cDNA clone NSFM-111g10, mRNA sequence	AM092063	0	823	1	490	1	40%
RAAPBAR022B12.g	blastn	dbESTs_Llongipalpis.fasta	AM093921 Lutzomyia longipalpis Jacobina whole fly Lutzomyia longipalpis cDNA clone SFM-04g06, mRNA sequence	AM093921	0	706	1	599	1	44%
RAAPBAR022C04.g	blastn	dbESTs_Llongipalpis.fasta	AM098057 Lutzomyia longipalpis Jacobina whole fly Lutzomyia longipalpis cDNA clone NSFM-64b01, mRNA sequence	AM098057	5e-91	333	1	430	1	39%
RAAPBAR022C09.g	blastn	dbESTs_Llongipalpis.fasta	LJGD-L3_H03 Adult female Lutzomyia longipalpis midgut library post blood meal digestion Lutzomyia longipalpis cDNA, mRNA sequence	EW991322	6e-55	212	1	216	1	30%
RAAPBAR022C11.g	blastn	dbESTs_Llongipalpis.fasta	AM104918 Lutzomyia longipalpis Jacobina whole fly Lutzomyia longipalpis cDNA clone NSFM-131d06, mRNA sequence	AM104918	3e-59	226	1	153	1	24%
RAAPBAR022C12.g	blastn	dbESTs_Llongipalpis.fasta	AM107036 Lutzomyia longipalpis Jacobina whole fly Lutzomyia longipalpis cDNA clone NSFM-34b11, mRNA sequence	AM107036	1e-88	325	1	418	1	29%
RAAPBAR022D06.g	blastn	dbESTs_Llongipalpis.fasta	LJGD-L4_D11 Adult female Lutzomyia longipalpis midgut library post blood meal digestion Lutzomyia longipalpis cDNA, mRNA sequence	EW991366	0	636	1	656	3	49%
RAAPBAR022D11.g	blastn	dbESTs_Llongipalpis.fasta	LJGDIM21_C10 Adult female Lutzomyia longipalpis midgut library post blood meal digestion containing Leishmania chagasi Lutzomyia longipalpis cDNA, mRNA sequence	EW993062	0	642	1	431	2	44%
RAAPBAR022E03.g	blastn	dbESTs_Llongipalpis.fasta	AM109166 Lutzomyia longipalpis Jacobina whole fly Lutzomyia longipalpis cDNA clone NSFM-47d10, mRNA sequence	AM109166	3e-61	234	1	430	1	19%
RAAPBAR022E05.g	blastn	dbESTs_Llongipalpis.fasta	LJGUL-P03_H08 Adult female Lutzomyia longipalpis midgut library sugar fed Lutzomyia longipalpis cDNA, mRNA sequence	EW995475	1e-127	452	1	272	1	46%
RAAPBAR022E07.g	blastn	dbESTs_Llongipalpis.fasta	LJGFM7_B10 Adult female Lutzomyia longipalpis midgut library blood fed Lutzomyia longipalpis cDNA, mRNA sequence	EW988193	1e-156	551	1	528	1	43%
RAAPBAR022E08.g	blastn	dbESTs_Llongipalpis.fasta	AM092288 Lutzomyia longipalpis Jacobina whole fly Lutzomyia longipalpis cDNA clone NSFM-40d01, mRNA sequence	AM092288	0	765	1	598	1	50%
RAAPBAR022E09.g	blastn	dbESTs_Llongipalpis.fasta	LJGFIL6_B11 Adult female Lutzomyia longipalpis midgut library blood fed containing Leishmania chagasi Lutzomyia longipalpis cDNA, mRNA sequence	EW989570	1e-109	392	1	341	1	32%
RAAPBAR022E10.g	blastn	dbESTs_Llongipalpis.fasta	LJGD-L3_H03 Adult female Lutzomyia longipalpis midgut library post blood meal digestion Lutzomyia longipalpis cDNA, mRNA sequence	EW991322	9e-55	212	1	320	1	42%
RAAPBAR022E11.g	blastn	dbESTs_Llongipalpis.fasta	AM105679 Lutzomyia longipalpis Jacobina whole fly Lutzomyia longipalpis cDNA clone NSFM-115a02, mRNA sequence	AM105679	2e-76	285	1	628	1	25%
RAAPBAR022E12.g	blastn	dbESTs_Llongipalpis.fasta	LJGUM-P01_B08 Adult female Lutzomyia longipalpis midgut library sugar fed Lutzomyia longipalpis cDNA, mRNA sequence	EW996013	4e-84	309	1	222	1	33%
RAAPBAR022F01.g	blastn	dbESTs_Llongipalpis.fasta	AM096094 Lutzomyia longipalpis Jacobina whole fly Lutzomyia longipalpis cDNA clone NSFM-164e09, mRNA sequence	AM096094	0	821	1	572	1	46%
RAAPBAR022F02.g	blastn	dbESTs_Llongipalpis.fasta	LJGF-L-10_F04 Adult female Lutzomyia longipalpis midgut library blood fed Lutzomyia longipalpis cDNA, mRNA sequence	EW987504	0	644	1	594	1	42%
RAAPBAR022F03.g	blastn	dbESTs_Llongipalpis.fasta	LJGD-L3_H03 Adult female Lutzomyia longipalpis midgut library post blood meal digestion Lutzomyia longipalpis cDNA, mRNA sequence	EW991322	5e-55	212	1	186	1	32%
RAAPBAR022F06.g	blastn	dbESTs_Llongipalpis.fasta	LJGDM26_D01 Adult female Lutzomyia longipalpis midgut library post blood meal digestion Lutzomyia longipalpis cDNA, mRNA sequence	EW992311	4e-26	117	1	330	1	28%
RAAPBAR022F08.g	blastn	dbESTs_Llongipalpis.fasta	AM088891 Lutzomyia longipalpis Jacobina whole fly Lutzomyia longipalpis cDNA clone NSFM-163d11, mRNA sequence	AM088891	2e-08	60	1	731	1	50%
RAAPBAR022F10.g	blastn	dbESTs_Llongipalpis.fasta	LJGUM-P01_B08 Adult female Lutzomyia longipalpis midgut library sugar fed Lutzomyia longipalpis cDNA, mRNA sequence	EW996013	3e-82	303	1	251	1	36%
RAAPBAR022G02.g	blastn	dbESTs_Llongipalpis.fasta	AM093708 Lutzomyia longipalpis Jacobina whole fly Lutzomyia longipalpis cDNA clone NSFM-98d10, mRNA sequence	AM093708	0	886	1	542	1	44%
RAAPBAR022G07.g	blastn	dbESTs_Llongipalpis.fasta	LJGFIL8_G07 Adult female Lutzomyia longipalpis midgut library blood fed containing Leishmania chagasi Lutzomyia longipalpis cDNA, mRNA sequence	EW989772	3e-19	94	1	182	1	35%
RAAPBAR022G08.g	blastn	dbESTs_Llongipalpis.fasta	LJGD-L3_H03 Adult female Lutzomyia longipalpis midgut library post blood meal digestion Lutzomyia longipalpis cDNA, mRNA sequence	EW991322	2e-44	178	1	479	4	30%
RAAPBAR022H04.g	blastn	dbESTs_Llongipalpis.fasta	AM097524 Lutzomyia longipalpis Jacobina whole fly Lutzomyia longipalpis cDNA clone NSFM-91b10, mRNA sequence	AM097524	1e-158	555	1	399	1	39%
RAAPBAR022H09.g	blastn	dbESTs_Llongipalpis.fasta	LJGF-L-10_C01 Adult female Lutzomyia longipalpis midgut library blood fed Lutzomyia longipalpis cDNA, mRNA sequence	EW987468	5e-56	216	1	291	1	22%
RAAPBAR023A05.g	blastn	dbESTs_Llongipalpis.fasta	AM094379 Lutzomyia longipalpis Jacobina whole fly Lutzomyia longipalpis cDNA clone NSFM-160h02, mRNA sequence	AM094379	1e-135	480	1	455	1	44%
RAAPBAR023A06.g	blastn	dbESTs_Llongipalpis.fasta	LJGDM24_A01 Adult female Lutzomyia longipalpis midgut library post blood meal digestion Lutzomyia longipalpis cDNA, mRNA sequence	EW992115	6e-26	117	1	486	6	29%
RAAPBAR023A09.g	blastn	dbESTs_Llongipalpis.fasta	AM095805 Lutzomyia longipalpis Jacobina whole fly Lutzomyia longipalpis cDNA clone NSFM-40h08, mRNA sequence	AM095805	0	803	1	635	1	49%
RAAPBAR023A12.g	blastn	dbESTs_Llongipalpis.fasta	AM097975 Lutzomyia longipalpis Jacobina whole fly Lutzomyia longipalpis cDNA clone NSFM-56h07, mRNA sequence	AM097975	0	858	1	551	1	48%
RAAPBAR023B02.g	blastn	dbESTs_Llongipalpis.fasta	LJGUS_P03_C10 Adult female Lutzomyia longipalpis midgut library sugar fed Lutzomyia longipalpis cDNA, mRNA sequence	EW996529	2e-13	76	1	405	1	46%
RAAPBAR023B04.g	blastn	dbESTs_Llongipalpis.fasta	AM109644 Lutzomyia longipalpis Jacobina whole fly Lutzomyia longipalpis cDNA clone NSFM-154c05, mRNA sequence	AM109644	0	1136	1	614	2	51%
RAAPBAR023B07.g	blastn	dbESTs_Llongipalpis.fasta	AM105682 Lutzomyia longipalpis Jacobina whole fly Lutzomyia longipalpis cDNA clone NSFM-72g09, mRNA sequence	AM105682	1e-166	583	1	514	1	45%
RAAPBAR023B09.g	blastn	dbESTs_Llongipalpis.fasta	LJGDM31_F01 Adult female Lutzomyia longipalpis midgut library post blood meal digestion Lutzomyia longipalpis cDNA, mRNA sequence	EW992759	0	928	1	551	1	46%
RAAPBAR023C03.g	blastn	dbESTs_Llongipalpis.fasta	AM093677 Lutzomyia longipalpis Jacobina whole fly Lutzomyia longipalpis cDNA clone NSFM-160a04, mRNA sequence	AM093677	1e-148	523	1	390	1	37%
RAAPBAR023C05.g	blastn	dbESTs_Llongipalpis.fasta	AM092648 Lutzomyia longipalpis Jacobina whole fly Lutzomyia longipalpis cDNA clone NSFM-17c08, mRNA sequence	AM092648	2e-51	202	1	604	1	25%
RAAPBAR023C09.g	blastn	dbESTs_Llongipalpis.fasta	LJGUM-P02_E11 Adult female Lutzomyia longipalpis midgut library sugar fed Lutzomyia longipalpis cDNA, mRNA sequence	EW996134	0	660	1	441	1	35%
RAAPBAR023C10.g	blastn	dbESTs_Llongipalpis.fasta	LJGD-L5_C09 Adult female Lutzomyia longipalpis midgut library post blood meal digestion Lutzomyia longipalpis cDNA, mRNA sequence	EW991428	0	716	1	604	1	45%
RAAPBAR023C12.g	blastn	dbESTs_Llongipalpis.fasta	AM092275 Lutzomyia longipalpis Jacobina whole fly Lutzomyia longipalpis cDNA clone NSFM-109d01, mRNA sequence	AM092275	4e-08	58	1	364	1	42%
RAAPBAR023D01.g	blastn	dbESTs_Llongipalpis.fasta	AM097658 Lutzomyia longipalpis Jacobina whole fly Lutzomyia longipalpis cDNA clone NSFM-80h01, mRNA sequence	AM097658	3e-18	92	1	365	1	19%
RAAPBAR023D02.g	blastn	dbESTs_Llongipalpis.fasta	AM106004 Lutzomyia longipalpis Jacobina whole fly Lutzomyia longipalpis cDNA clone SFM-02c08, mRNA sequence	AM106004	0	680	1	494	1	49%
RAAPBAR023D03.g	blastn	dbESTs_Llongipalpis.fasta	LJGF-L-5_E10 Adult female Lutzomyia longipalpis midgut library blood fed Lutzomyia longipalpis cDNA, mRNA sequence	EW987578	0	688	1	672	1	47%
RAAPBAR023D06.g	blastn	dbESTs_Llongipalpis.fasta	LJGFIS32_F04 Adult female Lutzomyia longipalpis midgut library blood fed containing Leishmania chagasi Lutzomyia longipalpis cDNA, mRNA sequence	EW990913	7e-43	172	1	267	1	20%
RAAPBAR023D07.g	blastn	dbESTs_Llongipalpis.fasta	LJGU-M-6_C11 Adult female Lutzomyia longipalpis midgut library sugar fed Lutzomyia longipalpis cDNA, mRNA sequence	EW995699	0	999	1	1060	3	38%
RAAPBAR023E01.g	blastn	dbESTs_Llongipalpis.fasta	LJGFS_P03_D12 Adult female Lutzomyia longipalpis midgut library blood fed Lutzomyia longipalpis cDNA, mRNA sequence	EW988966	0	932	1	633	1	38%
RAAPBAR023E02.g	blastn	dbESTs_Llongipalpis.fasta	LJGUM-P01_B08 Adult female Lutzomyia longipalpis midgut library sugar fed Lutzomyia longipalpis cDNA, mRNA sequence	EW996013	3e-84	309	1	213	1	34%
RAAPBAR023E04.g	blastn	dbESTs_Llongipalpis.fasta	LJGD-L3_H03 Adult female Lutzomyia longipalpis midgut library post blood meal digestion Lutzomyia longipalpis cDNA, mRNA sequence	EW991322	3e-41	167	1	210	1	30%
RAAPBAR023E05.g	blastn	dbESTs_Llongipalpis.fasta	LJGU-M-6_G08 Adult female Lutzomyia longipalpis midgut library sugar fed Lutzomyia longipalpis cDNA, mRNA sequence	EW995738	0	803	1	674	1	42%
RAAPBAR023E06.g	blastn	dbESTs_Llongipalpis.fasta	AM109602 Lutzomyia longipalpis Jacobina whole fly Lutzomyia longipalpis cDNA clone NSFM-02f02, mRNA sequence	AM109602	0	1003	1	784	1	43%
RAAPBAR023E07.g	blastn	dbESTs_Llongipalpis.fasta	LJGFM-P01_H10 Adult female Lutzomyia longipalpis midgut library blood fed Lutzomyia longipalpis cDNA, mRNA sequence	EW988483	2e-88	325	1	568	1	27%
RAAPBAR023E11.g	blastn	dbESTs_Llongipalpis.fasta	LJGF-L-5_B11 Adult female Lutzomyia longipalpis midgut library blood fed Lutzomyia longipalpis cDNA, mRNA sequence	EW987549	0	729	1	535	1	38%
RAAPBAR023F01.g	blastn	dbESTs_Llongipalpis.fasta	LJGUM-P02_A12 Adult female Lutzomyia longipalpis midgut library sugar fed Lutzomyia longipalpis cDNA, mRNA sequence	EW996092	8e-86	315	1	292	1	43%
RAAPBAR023F02.g	blastn	dbESTs_Llongipalpis.fasta	AM096567 Lutzomyia longipalpis Jacobina whole fly Lutzomyia longipalpis cDNA clone NSFM-80b06, mRNA sequence	AM096567	0	664	1	597	1	47%
RAAPBAR023F06.g	blastn	dbESTs_Llongipalpis.fasta	AM100550 Lutzomyia longipalpis Jacobina whole fly Lutzomyia longipalpis cDNA clone NSFM-138c07, mRNA sequence	AM100550	6e-78	289	1	380	1	36%
RAAPBAR023F11.g	blastn	dbESTs_Llongipalpis.fasta	AM105778 Lutzomyia longipalpis Jacobina whole fly Lutzomyia longipalpis cDNA clone NSFM-100a05, mRNA sequence	AM105778	0	640	1	527	1	41%
RAAPBAR023G08.g	blastn	dbESTs_Llongipalpis.fasta	AM109768 Lutzomyia longipalpis Jacobina whole fly Lutzomyia longipalpis cDNA clone SFM-04e04, mRNA sequence	AM109768	0	674	1	738	1	44%
RAAPBAR023H02.g	blastn	dbESTs_Llongipalpis.fasta	AM097383 Lutzomyia longipalpis Jacobina whole fly Lutzomyia longipalpis cDNA clone NSFM-65c06, mRNA sequence	AM097383	0	888	1	619	1	50%
RAAPBAR023H07.g	blastn	dbESTs_Llongipalpis.fasta	LJGD-L3_G03 Adult female Lutzomyia longipalpis midgut library post blood meal digestion Lutzomyia longipalpis cDNA, mRNA sequence	EW991316	0	642	1	504	1	38%
RAAPBAR023H12.g	blastn	dbESTs_Llongipalpis.fasta	LJGD-L2_F12 Adult female Lutzomyia longipalpis midgut library post blood meal digestion Lutzomyia longipalpis cDNA, mRNA sequence	EW991239	3e-12	72	1	484	1	41%
RAAPBAR024A07.g	blastn	dbESTs_Llongipalpis.fasta	AM090875 Lutzomyia longipalpis Jacobina whole fly Lutzomyia longipalpis cDNA clone NSFM-145a07, mRNA sequence	AM090875	0	783	1	474	1	44%
RAAPBAR024A09.g	blastn	dbESTs_Llongipalpis.fasta	AM103386 Lutzomyia longipalpis Jacobina whole fly Lutzomyia longipalpis cDNA clone SFM-03d08, mRNA sequence	AM103386	4e-60	230	1	308	1	31%
RAAPBAR024B02.g	blastn	dbESTs_Llongipalpis.fasta	AM098449 Lutzomyia longipalpis Jacobina whole fly Lutzomyia longipalpis cDNA clone NSFM-47f07, mRNA sequence	AM098449	1e-125	446	1	392	2	18%
RAAPBAR024B05.g	blastn	dbESTs_Llongipalpis.fasta	LJGDIM29_B04 Adult female Lutzomyia longipalpis midgut library post blood meal digestion containing Leishmania chagasi Lutzomyia longipalpis cDNA, mRNA sequence	EW993669	3e-23	107	1	263	1	20%
RAAPBAR024B06.g	blastn	dbESTs_Llongipalpis.fasta	LJGDM27_A10 Adult female Lutzomyia longipalpis midgut library post blood meal digestion Lutzomyia longipalpis cDNA, mRNA sequence	EW992369	1e-131	468	1	517	1	33%
RAAPBAR024B08.g	blastn	dbESTs_Llongipalpis.fasta	LJGU-M-9_G01 Adult female Lutzomyia longipalpis midgut library sugar fed Lutzomyia longipalpis cDNA, mRNA sequence	EW995979	2e-26	119	1	500	1	37%
RAAPBAR024B10.g	blastn	dbESTs_Llongipalpis.fasta	AM103551 Lutzomyia longipalpis Jacobina whole fly Lutzomyia longipalpis cDNA clone NSFM-69h02, mRNA sequence	AM103551	0	676	1	511	2	39%
RAAPBAR024C01.g	blastn	dbESTs_Llongipalpis.fasta	AM108164 Lutzomyia longipalpis Jacobina whole fly Lutzomyia longipalpis cDNA clone NSFM-73a07, mRNA sequence	AM108164	1e-87	321	1	230	1	41%
RAAPBAR024C07.g	blastn	dbESTs_Llongipalpis.fasta	LJGU-L-8_A03 Adult female Lutzomyia longipalpis midgut library sugar fed Lutzomyia longipalpis cDNA, mRNA sequence	EW995134	0	785	1	621	1	39%
RAAPBAR024C10.g	blastn	dbESTs_Llongipalpis.fasta	AM093756 Lutzomyia longipalpis Jacobina whole fly Lutzomyia longipalpis cDNA clone NSFM-97c06, mRNA sequence	AM093756	0	1041	1	723	1	47%
RAAPBAR024D01.g	blastn	dbESTs_Llongipalpis.fasta	AM109006 Lutzomyia longipalpis Jacobina whole fly Lutzomyia longipalpis cDNA clone NSFM-141a09, mRNA sequence	AM109006	1e-136	482	1	451	1	25%
RAAPBAR024D03.g	blastn	dbESTs_Llongipalpis.fasta	AM090958 Lutzomyia longipalpis Jacobina whole fly Lutzomyia longipalpis cDNA clone NSFM-77d09, mRNA sequence	AM090958	8e-67	252	1	236	1	19%
RAAPBAR024E02.g	blastn	dbESTs_Llongipalpis.fasta	AM098795 Lutzomyia longipalpis Jacobina whole fly Lutzomyia longipalpis cDNA clone NSFM-02d01, mRNA sequence	AM098795	3e-33	141	1	289	1	44%
RAAPBAR024E04.g	blastn	dbESTs_Llongipalpis.fasta	AM101767 Lutzomyia longipalpis Jacobina whole fly Lutzomyia longipalpis cDNA clone NSFM-81c01, mRNA sequence	AM101767	6e-08	56	1	162	1	35%
RAAPBAR024E05.g	blastn	dbESTs_Llongipalpis.fasta	LJGUM-P03_C03 Adult female Lutzomyia longipalpis midgut library sugar fed Lutzomyia longipalpis cDNA, mRNA sequence	EW996178	0	700	1	524	2	40%
RAAPBAR024E09.g	blastn	dbESTs_Llongipalpis.fasta	LJGDM27_A10 Adult female Lutzomyia longipalpis midgut library post blood meal digestion Lutzomyia longipalpis cDNA, mRNA sequence	EW992369	1e-159	561	1	489	2	35%
RAAPBAR024E10.g	blastn	dbESTs_Llongipalpis.fasta	AM094837 Lutzomyia longipalpis Jacobina whole fly Lutzomyia longipalpis cDNA clone NSFM-137g04, mRNA sequence	AM094837	0	1191	1	648	1	46%
RAAPBAR024F01.g	blastn	dbESTs_Llongipalpis.fasta	AM104502 Lutzomyia longipalpis Jacobina whole fly Lutzomyia longipalpis cDNA clone SFM-03h11, mRNA sequence	AM104502	0	698	1	656	1	53%
RAAPBAR024F06.g	blastn	dbESTs_Llongipalpis.fasta	AM104670 Lutzomyia longipalpis Jacobina whole fly Lutzomyia longipalpis cDNA clone NSFM-142h12, mRNA sequence	AM104670	1e-152	535	1	444	1	39%
RAAPBAR024F07.g	blastn	dbESTs_Llongipalpis.fasta	LJGDIS30_C06 Adult female Lutzomyia longipalpis midgut library post blood meal digestion containing Leishmania chagasi Lutzomyia longipalpis cDNA, mRNA sequence	EW993747	0	747	1	473	1	49%
RAAPBAR024F08.g	blastn	dbESTs_Llongipalpis.fasta	AM104695 Lutzomyia longipalpis Jacobina whole fly Lutzomyia longipalpis cDNA clone NSFM-60d08, mRNA sequence	AM104695	0	1263	1	706	2	50%
RAAPBAR024F10.g	blastn	dbESTs_Llongipalpis.fasta	LJGU-M-6_G11 Adult female Lutzomyia longipalpis midgut library sugar fed Lutzomyia longipalpis cDNA, mRNA sequence	EW995741	1e-140	496	1	435	1	41%
RAAPBAR024G01.g	blastn	dbESTs_Llongipalpis.fasta	LJGFM-P03_E05 Adult female Lutzomyia longipalpis midgut library blood fed Lutzomyia longipalpis cDNA, mRNA sequence	EW988633	4e-56	216	1	207	1	34%
RAAPBAR024G03.g	blastn	dbESTs_Llongipalpis.fasta	AM105560 Lutzomyia longipalpis Jacobina whole fly Lutzomyia longipalpis cDNA clone NSFM-153h10, mRNA sequence	AM105560	7e-30	129	1	201	1	26%
RAAPBAR024G04.g	blastn	dbESTs_Llongipalpis.fasta	AM106313 Lutzomyia longipalpis Jacobina whole fly Lutzomyia longipalpis cDNA clone NSFM-99a09, mRNA sequence	AM106313	0	979	1	618	1	46%
RAAPBAR024G06.g	blastn	dbESTs_Llongipalpis.fasta	LJGFM8_H08 Adult female Lutzomyia longipalpis midgut library blood fed Lutzomyia longipalpis cDNA, mRNA sequence	EW988309	0	797	1	502	1	44%
RAAPBAR024G10.g	blastn	dbESTs_Llongipalpis.fasta	LJGUS_P04_A10 Adult female Lutzomyia longipalpis midgut library sugar fed Lutzomyia longipalpis cDNA, mRNA sequence	EW996598	1e-124	444	1	325	2	37%
RAAPBAR024H01.g	blastn	dbESTs_Llongipalpis.fasta	AM109787 Lutzomyia longipalpis Jacobina whole fly Lutzomyia longipalpis cDNA clone NSFM-153b08, mRNA sequence	AM109787	0	686	1	592	1	51%
RAAPBAR024H02.g	blastn	dbESTs_Llongipalpis.fasta	LJGUL-P01_D09 Adult female Lutzomyia longipalpis midgut library sugar fed Lutzomyia longipalpis cDNA, mRNA sequence	EW995299	7e-71	266	1	304	1	44%
RAAPBAR024H05.g	blastn	dbESTs_Llongipalpis.fasta	AM100360 Lutzomyia longipalpis Jacobina whole fly Lutzomyia longipalpis cDNA clone NSFM-77f02, mRNA sequence	AM100360	1e-153	539	1	485	2	30%
RAAPBAR024H08.g	blastn	dbESTs_Llongipalpis.fasta	AM097722 Lutzomyia longipalpis Jacobina whole fly Lutzomyia longipalpis cDNA clone NSFM-127a04, mRNA sequence	AM097722	1e-166	585	1	612	2	46%
RAAPBAR024H09.g	blastn	dbESTs_Llongipalpis.fasta	LJGFIL3_F02 Adult female Lutzomyia longipalpis midgut library blood fed containing Leishmania chagasi Lutzomyia longipalpis cDNA, mRNA sequence	EW989380	0	1380	1	1018	3	42%
RAAPBAR024H10.g	blastn	dbESTs_Llongipalpis.fasta	AM089206 Lutzomyia longipalpis Jacobina whole fly Lutzomyia longipalpis cDNA clone NSFM-01d06, mRNA sequence	AM089206	0	1259	1	682	2	56%
RAAPBAR024H11.g	blastn	dbESTs_Llongipalpis.fasta	AM106775 Lutzomyia longipalpis Jacobina whole fly Lutzomyia longipalpis cDNA clone NSFM-71b09, mRNA sequence	AM106775	3e-97	353	1	256	1	35%
RAAPBAR024H12.g	blastn	dbESTs_Llongipalpis.fasta	LJGD-L3_H03 Adult female Lutzomyia longipalpis midgut library post blood meal digestion Lutzomyia longipalpis cDNA, mRNA sequence	EW991322	1e-54	212	1	476	1	29%
RAAPBAR027A06.g	blastn	dbESTs_Llongipalpis.fasta	AM094182 Lutzomyia longipalpis Jacobina whole fly Lutzomyia longipalpis cDNA clone NSFM-138e06, mRNA sequence	AM094182	1e-177	620	1	650	1	40%
RAAPBAR027A09.g	blastn	dbESTs_Llongipalpis.fasta	LJGFIM26_F03 Adult female Lutzomyia longipalpis midgut library blood fed containing Leishmania chagasi Lutzomyia longipalpis cDNA, mRNA sequence	EW990418	3e-15	82	1	413	1	51%
RAAPBAR027A12.g	blastn	dbESTs_Llongipalpis.fasta	LJGDIS31_G09 Adult female Lutzomyia longipalpis midgut library post blood meal digestion containing Leishmania chagasi Lutzomyia longipalpis cDNA, mRNA sequence	EW993883	0	761	1	484	1	42%
RAAPBAR027B11.g	blastn	dbESTs_Llongipalpis.fasta	LJGUS_P01_C04 Adult female Lutzomyia longipalpis midgut library sugar fed Lutzomyia longipalpis cDNA, mRNA sequence	EW996342	4e-45	180	1	423	1	50%
RAAPBAR027B12.g	blastn	dbESTs_Llongipalpis.fasta	AM090762 Lutzomyia longipalpis Jacobina whole fly Lutzomyia longipalpis cDNA clone NSFM-141a06, mRNA sequence	AM090762	6e-80	295	1	252	1	34%
RAAPBAR027C02.g	blastn	dbESTs_Llongipalpis.fasta	AM105288 Lutzomyia longipalpis Jacobina whole fly Lutzomyia longipalpis cDNA clone NSFM-117c06, mRNA sequence	AM105288	0	729	1	676	1	38%
RAAPBAR027C03.g	blastn	dbESTs_Llongipalpis.fasta	LJGFS_P01_B09 Adult female Lutzomyia longipalpis midgut library blood fed Lutzomyia longipalpis cDNA, mRNA sequence	EW988770	2e-79	293	1	241	1	34%
RAAPBAR027C12.g	blastn	dbESTs_Llongipalpis.fasta	LJGUM-P01_B08 Adult female Lutzomyia longipalpis midgut library sugar fed Lutzomyia longipalpis cDNA, mRNA sequence	EW996013	8e-82	301	1	214	1	34%
RAAPBAR027D05.g	blastn	dbESTs_Llongipalpis.fasta	AM102060 Lutzomyia longipalpis Jacobina whole fly Lutzomyia longipalpis cDNA clone NSFM-59c04, mRNA sequence	AM102060	0	767	1	517	1	36%
RAAPBAR027E05.g	blastn	dbESTs_Llongipalpis.fasta	AM101013 Lutzomyia longipalpis Jacobina whole fly Lutzomyia longipalpis cDNA clone NSFM-88h03, mRNA sequence	AM101013	0	789	1	607	1	43%
RAAPBAR027E07.g	blastn	dbESTs_Llongipalpis.fasta	AM109643 Lutzomyia longipalpis Jacobina whole fly Lutzomyia longipalpis cDNA clone NSFM-23c03, mRNA sequence	AM109643	3e-27	121	1	374	1	46%
RAAPBAR027E11.g	blastn	dbESTs_Llongipalpis.fasta	AM091880 Lutzomyia longipalpis Jacobina whole fly Lutzomyia longipalpis cDNA clone NSFM-44g09, mRNA sequence	AM091880	0	1031	1	635	1	46%
RAAPBAR027E12.g	blastn	dbESTs_Llongipalpis.fasta	LJGUM-P01_B06 Adult female Lutzomyia longipalpis midgut library sugar fed Lutzomyia longipalpis cDNA, mRNA sequence	EW996011	2e-07	56	1	506	1	36%
RAAPBAR027F01.g	blastn	dbESTs_Llongipalpis.fasta	LJGU-M-5_F06 Adult female Lutzomyia longipalpis midgut library sugar fed Lutzomyia longipalpis cDNA, mRNA sequence	EW995653	1e-124	442	1	495	1	48%
RAAPBAR027F09.g	blastn	dbESTs_Llongipalpis.fasta	LJGD-L3_H03 Adult female Lutzomyia longipalpis midgut library post blood meal digestion Lutzomyia longipalpis cDNA, mRNA sequence	EW991322	6e-46	182	1	229	1	29%
RAAPBAR027F12.g	blastn	dbESTs_Llongipalpis.fasta	LJGFS_P01_B09 Adult female Lutzomyia longipalpis midgut library blood fed Lutzomyia longipalpis cDNA, mRNA sequence	EW988770	4e-84	309	1	219	1	34%
RAAPBAR027G02.g	blastn	dbESTs_Llongipalpis.fasta	LJGUS_P02_B08 Adult female Lutzomyia longipalpis midgut library sugar fed Lutzomyia longipalpis cDNA, mRNA sequence	EW996426	1e-18	92	1	151	1	24%
RAAPBAR027G12.g	blastn	dbESTs_Llongipalpis.fasta	AM101833 Lutzomyia longipalpis Jacobina whole fly Lutzomyia longipalpis cDNA clone NSFM-122g04, mRNA sequence	AM101833	0	910	1	659	1	46%
RAAPBAR027H04.g	blastn	dbESTs_Llongipalpis.fasta	AM100704 Lutzomyia longipalpis Jacobina whole fly Lutzomyia longipalpis cDNA clone NSFM-60g06, mRNA sequence	AM100704	5e-69	260	1	362	1	23%
RAAPBAR027H05.g	blastn	dbESTs_Llongipalpis.fasta	AM096252 Lutzomyia longipalpis Jacobina whole fly Lutzomyia longipalpis cDNA clone NSFM-137d04, mRNA sequence	AM096252	0	813	1	811	3	33%
RAAPBAR027H11.g	blastn	dbESTs_Llongipalpis.fasta	AM094458 Lutzomyia longipalpis Jacobina whole fly Lutzomyia longipalpis cDNA clone NSFM-119e12, mRNA sequence	AM094458	3e-07	56	1	735	1	39%
RAAPBAR027H12.g	blastn	dbESTs_Llongipalpis.fasta	LJGD-L3_H03 Adult female Lutzomyia longipalpis midgut library post blood meal digestion Lutzomyia longipalpis cDNA, mRNA sequence	EW991322	7e-11	66	1	175	1	35%
RAAPBAR029A02.g	blastn	dbESTs_Llongipalpis.fasta	AM095625 Lutzomyia longipalpis Jacobina whole fly Lutzomyia longipalpis cDNA clone NSFM-56c03, mRNA sequence	AM095625	4e-77	285	1	181	1	46%
RAAPBAR029A04.g	blastn	dbESTs_Llongipalpis.fasta	AM091748 Lutzomyia longipalpis Jacobina whole fly Lutzomyia longipalpis cDNA clone NSFM-85g09, mRNA sequence	AM091748	0	844	1	466	1	47%
RAAPBAR029A06.g	blastn	dbESTs_Llongipalpis.fasta	AM095752 Lutzomyia longipalpis Jacobina whole fly Lutzomyia longipalpis cDNA clone NSFM-115e09, mRNA sequence	AM095752	1e-132	470	1	438	1	41%
RAAPBAR029A09.g	blastn	dbESTs_Llongipalpis.fasta	AM093339 Lutzomyia longipalpis Jacobina whole fly Lutzomyia longipalpis cDNA clone NSFM-13g02, mRNA sequence	AM093339	0	837	1	566	1	36%
RAAPBAR029B03.g	blastn	dbESTs_Llongipalpis.fasta	AM090191 Lutzomyia longipalpis Jacobina whole fly Lutzomyia longipalpis cDNA clone NSFM-59g01, mRNA sequence	AM090191	3e-44	178	1	637	1	43%
RAAPBAR029B08.g	blastn	dbESTs_Llongipalpis.fasta	AM097579 Lutzomyia longipalpis Jacobina whole fly Lutzomyia longipalpis cDNA clone NSFM-27g10, mRNA sequence	AM097579	0	775	1	544	1	50%
RAAPBAR029C01.g	blastn	dbESTs_Llongipalpis.fasta	AM094501 Lutzomyia longipalpis Jacobina whole fly Lutzomyia longipalpis cDNA clone NSFM-89c07, mRNA sequence	AM094501	6e-94	343	1	536	1	38%
RAAPBAR029D09.g	blastn	dbESTs_Llongipalpis.fasta	LJGDIS32_G12 Adult female Lutzomyia longipalpis midgut library post blood meal digestion containing Leishmania chagasi Lutzomyia longipalpis cDNA, mRNA sequence	EW993974	0	644	1	424	1	43%
RAAPBAR029E05.g	blastn	dbESTs_Llongipalpis.fasta	AM103328 Lutzomyia longipalpis Jacobina whole fly Lutzomyia longipalpis cDNA clone NSFM-140f02, mRNA sequence	AM103328	0	753	1	762	1	42%
RAAPBAR029F06.g	blastn	dbESTs_Llongipalpis.fasta	AM100041 Lutzomyia longipalpis Jacobina whole fly Lutzomyia longipalpis cDNA clone NSFM-61e10, mRNA sequence	AM100041	0	797	1	454	1	56%
RAAPBAR029F09.g	blastn	dbESTs_Llongipalpis.fasta	LJGD-L6_A03 Adult female Lutzomyia longipalpis midgut library post blood meal digestion Lutzomyia longipalpis cDNA, mRNA sequence	EW991484	0	823	1	598	1	40%
RAAPBAR029F10.g	blastn	dbESTs_Llongipalpis.fasta	LJGD-L4_A07 Adult female Lutzomyia longipalpis midgut library post blood meal digestion Lutzomyia longipalpis cDNA, mRNA sequence	EW991333	3e-29	127	1	246	1	17%
RAAPBAR029H12.g	blastn	dbESTs_Llongipalpis.fasta	LJGU-L-7_C09 Adult female Lutzomyia longipalpis midgut library sugar fed Lutzomyia longipalpis cDNA, mRNA sequence	EW995091	4e-24	111	1	514	1	17%
RAAPBAR030B01.g	blastn	dbESTs_Llongipalpis.fasta	LJGDM22_E07 Adult female Lutzomyia longipalpis midgut library post blood meal digestion Lutzomyia longipalpis cDNA, mRNA sequence	EW992001	0	753	1	514	4	40%
RAAPBAR030B03.g	blastn	dbESTs_Llongipalpis.fasta	AM105489 Lutzomyia longipalpis Jacobina whole fly Lutzomyia longipalpis cDNA clone NSFM-152c05, mRNA sequence	AM105489	2e-71	268	1	409	1	29%
RAAPBAR030B06.g	blastn	dbESTs_Llongipalpis.fasta	AM104670 Lutzomyia longipalpis Jacobina whole fly Lutzomyia longipalpis cDNA clone NSFM-142h12, mRNA sequence	AM104670	1e-161	565	1	412	1	38%
RAAPBAR030B07.g	blastn	dbESTs_Llongipalpis.fasta	LJGFIL2_B09 Adult female Lutzomyia longipalpis midgut library blood fed containing Leishmania chagasi Lutzomyia longipalpis cDNA, mRNA sequence	EW989270	0	878	1	558	3	48%
RAAPBAR030B09.g	blastn	dbESTs_Llongipalpis.fasta	AM109400 Lutzomyia longipalpis Jacobina whole fly Lutzomyia longipalpis cDNA clone NSFM-03c03, mRNA sequence	AM109400	1e-50	198	1	241	1	23%
RAAPBAR030C01.g	blastn	dbESTs_Llongipalpis.fasta	LJGUL-P03_F12 Adult female Lutzomyia longipalpis midgut library sugar fed Lutzomyia longipalpis cDNA, mRNA sequence	EW995463	1e-29	129	1	379	1	35%
RAAPBAR030C05.g	blastn	dbESTs_Llongipalpis.fasta	AM092827 Lutzomyia longipalpis Jacobina whole fly Lutzomyia longipalpis cDNA clone NSFM-83a11, mRNA sequence	AM092827	0	1035	1	617	2	43%
RAAPBAR030C07.g	blastn	dbESTs_Llongipalpis.fasta	AM107543 Lutzomyia longipalpis Jacobina whole fly Lutzomyia longipalpis cDNA clone NSFM-39d06, mRNA sequence	AM107543	1e-101	367	1	686	4	26%
RAAPBAR030C12.g	blastn	dbESTs_Llongipalpis.fasta	LJGU-M-10_B06 Adult female Lutzomyia longipalpis midgut library sugar fed Lutzomyia longipalpis cDNA, mRNA sequence	EW995542	0	850	1	481	1	55%
RAAPBAR030D10.g	blastn	dbESTs_Llongipalpis.fasta	LJGD-L5_H09 Adult female Lutzomyia longipalpis midgut library post blood meal digestion Lutzomyia longipalpis cDNA, mRNA sequence	EW991479	1e-80	297	1	189	2	41%
RAAPBAR030D11.g	blastn	dbESTs_Llongipalpis.fasta	LJGFM-P04_G10 Adult female Lutzomyia longipalpis midgut library blood fed Lutzomyia longipalpis cDNA, mRNA sequence	EW988739	2e-35	149	1	432	1	25%
RAAPBAR030E10.g	blastn	dbESTs_Llongipalpis.fasta	LJGFM-P01_H10 Adult female Lutzomyia longipalpis midgut library blood fed Lutzomyia longipalpis cDNA, mRNA sequence	EW988483	1e-161	567	1	404	1	32%
RAAPBAR030E12.g	blastn	dbESTs_Llongipalpis.fasta	AM093826 Lutzomyia longipalpis Jacobina whole fly Lutzomyia longipalpis cDNA clone NSFM-162d06, mRNA sequence	AM093826	0	848	1	642	1	43%
RAAPBAR030F02.g	blastn	dbESTs_Llongipalpis.fasta	AM092879 Lutzomyia longipalpis Jacobina whole fly Lutzomyia longipalpis cDNA clone NSFM-43g01, mRNA sequence	AM092879	2e-67	254	1	235	1	37%
RAAPBAR030F09.g	blastn	dbESTs_Llongipalpis.fasta	LJGFM5_B10 Adult female Lutzomyia longipalpis midgut library blood fed Lutzomyia longipalpis cDNA, mRNA sequence	EW988013	0	1352	1	939	2	44%
RAAPBAR030G04.g	blastn	dbESTs_Llongipalpis.fasta	AM092288 Lutzomyia longipalpis Jacobina whole fly Lutzomyia longipalpis cDNA clone NSFM-40d01, mRNA sequence	AM092288	0	640	1	527	1	48%
RAAPBAR030G05.g	blastn	dbESTs_Llongipalpis.fasta	LJGDIM29_D11 Adult female Lutzomyia longipalpis midgut library post blood meal digestion containing Leishmania chagasi Lutzomyia longipalpis cDNA, mRNA sequence	EW993694	0	656	1	560	1	44%
RAAPBAR030G08.g	blastn	dbESTs_Llongipalpis.fasta	AM097050 Lutzomyia longipalpis Jacobina whole fly Lutzomyia longipalpis cDNA clone NSFM-87e03, mRNA sequence	AM097050	0	1027	1	572	1	51%
RAAPBAR030G12.g	blastn	dbESTs_Llongipalpis.fasta	AM099673 Lutzomyia longipalpis Jacobina whole fly Lutzomyia longipalpis cDNA clone NSFM-27h06, mRNA sequence	AM099673	0	632	1	497	1	55%
RAAPBAR030H09.g	blastn	dbESTs_Llongipalpis.fasta	LJGD-L3_H03 Adult female Lutzomyia longipalpis midgut library post blood meal digestion Lutzomyia longipalpis cDNA, mRNA sequence	EW991322	5e-74	276	1	209	1	29%
RAAPBAR031A02.g	blastn	dbESTs_Llongipalpis.fasta	LJGUL-P01_G09 Adult female Lutzomyia longipalpis midgut library sugar fed Lutzomyia longipalpis cDNA, mRNA sequence	EW995325	0	862	1	518	1	50%
RAAPBAR031B02.g	blastn	dbESTs_Llongipalpis.fasta	AM091786 Lutzomyia longipalpis Jacobina whole fly Lutzomyia longipalpis cDNA clone NSFM-130h08, mRNA sequence	AM091786	2e-22	105	1	367	1	43%
RAAPBAR031B08.g	blastn	dbESTs_Llongipalpis.fasta	LJGFIL5_E05 Adult female Lutzomyia longipalpis midgut library blood fed containing Leishmania chagasi Lutzomyia longipalpis cDNA, mRNA sequence	EW989518	3e-08	58	1	335	1	37%
RAAPBAR031B10.g	blastn	dbESTs_Llongipalpis.fasta	LJGUM-P01_B08 Adult female Lutzomyia longipalpis midgut library sugar fed Lutzomyia longipalpis cDNA, mRNA sequence	EW996013	4e-84	309	1	218	1	33%
RAAPBAR031B11.g	blastn	dbESTs_Llongipalpis.fasta	AM104037 Lutzomyia longipalpis Jacobina whole fly Lutzomyia longipalpis cDNA clone NSFM-142c01, mRNA sequence	AM104037	0	712	1	537	1	49%
RAAPBAR031B12.g	blastn	dbESTs_Llongipalpis.fasta	AM109577 Lutzomyia longipalpis Jacobina whole fly Lutzomyia longipalpis cDNA clone NSFM-79h03, mRNA sequence	AM109577	0	664	1	445	1	36%
RAAPBAR031C01.g	blastn	dbESTs_Llongipalpis.fasta	AM090225 Lutzomyia longipalpis Jacobina whole fly Lutzomyia longipalpis cDNA clone NSFM-45g01, mRNA sequence	AM090225	1e-94	345	1	346	1	25%
RAAPBAR031C07.g	blastn	dbESTs_Llongipalpis.fasta	AM095955 Lutzomyia longipalpis Jacobina whole fly Lutzomyia longipalpis cDNA clone NSFM-45g02, mRNA sequence	AM095955	0	632	1	526	1	40%
RAAPBAR031D02.g	blastn	dbESTs_Llongipalpis.fasta	AM102190 Lutzomyia longipalpis Jacobina whole fly Lutzomyia longipalpis cDNA clone NSFM-28a04, mRNA sequence	AM102190	0	890	1	646	1	48%
RAAPBAR031D05.g	blastn	dbESTs_Llongipalpis.fasta	LJGFM-P03_A12 Adult female Lutzomyia longipalpis midgut library blood fed Lutzomyia longipalpis cDNA, mRNA sequence	EW988592	2e-70	264	1	214	1	29%
RAAPBAR031D09.g	blastn	dbESTs_Llongipalpis.fasta	AM105520 Lutzomyia longipalpis Jacobina whole fly Lutzomyia longipalpis cDNA clone NSFM-124e04, mRNA sequence	AM105520	5e-90	329	1	277	1	45%
RAAPBAR031E03.g	blastn	dbESTs_Llongipalpis.fasta	LJGUM-P01_B08 Adult female Lutzomyia longipalpis midgut library sugar fed Lutzomyia longipalpis cDNA, mRNA sequence	EW996013	6e-77	285	1	255	1	32%
RAAPBAR031E11.g	blastn	dbESTs_Llongipalpis.fasta	LJGFM9_B12 Adult female Lutzomyia longipalpis midgut library blood fed Lutzomyia longipalpis cDNA, mRNA sequence	EW988330	6e-45	178	1	164	1	37%
RAAPBAR031F01.g	blastn	dbESTs_Llongipalpis.fasta	LJGDIM21_B10 Adult female Lutzomyia longipalpis midgut library post blood meal digestion containing Leishmania chagasi Lutzomyia longipalpis cDNA, mRNA sequence	EW993053	1e-141	502	1	631	1	29%
RAAPBAR031F05.g	blastn	dbESTs_Llongipalpis.fasta	AM101413 Lutzomyia longipalpis Jacobina whole fly Lutzomyia longipalpis cDNA clone NSFM-125a11, mRNA sequence	AM101413	1e-107	389	1	526	1	29%
RAAPBAR031F06.g	blastn	dbESTs_Llongipalpis.fasta	LJGD-L9_D08 Adult female Lutzomyia longipalpis midgut library post blood meal digestion Lutzomyia longipalpis cDNA, mRNA sequence	EW991750	3e-08	58	1	317	1	46%
RAAPBAR031F09.g	blastn	dbESTs_Llongipalpis.fasta	AM098116 Lutzomyia longipalpis Jacobina whole fly Lutzomyia longipalpis cDNA clone NSFM-27e01, mRNA sequence	AM098116	0	971	1	572	1	35%
RAAPBAR031G01.g	blastn	dbESTs_Llongipalpis.fasta	AM091152 Lutzomyia longipalpis Jacobina whole fly Lutzomyia longipalpis cDNA clone NSFM-21e08, mRNA sequence	AM091152	1e-156	549	1	328	1	47%
RAAPBAR031G05.g	blastn	dbESTs_Llongipalpis.fasta	LJGU-M-5_C06 Adult female Lutzomyia longipalpis midgut library sugar fed Lutzomyia longipalpis cDNA, mRNA sequence	EW995625	0	650	1	682	1	42%
RAAPBAR031G08.g	blastn	dbESTs_Llongipalpis.fasta	AM093320 Lutzomyia longipalpis Jacobina whole fly Lutzomyia longipalpis cDNA clone SFM-05a05, mRNA sequence	AM093320	1e-134	478	1	418	2	42%
RAAPBAR031G10.g	blastn	dbESTs_Llongipalpis.fasta	LJGFIL1_C09 Adult female Lutzomyia longipalpis midgut library blood fed containing Leishmania chagasi Lutzomyia longipalpis cDNA, mRNA sequence	EW989125	3e-56	218	1	532	1	21%
RAAPBAR031H01.g	blastn	dbESTs_Llongipalpis.fasta	LJGFM10_A05 Adult female Lutzomyia longipalpis midgut library blood fed Lutzomyia longipalpis cDNA, mRNA sequence	EW987905	0	777	1	575	1	39%
RAAPBAR031H07.g	blastn	dbESTs_Llongipalpis.fasta	LJGFIM28_A09 Adult female Lutzomyia longipalpis midgut library blood fed containing Leishmania chagasi Lutzomyia longipalpis cDNA, mRNA sequence	EW990533	1e-119	428	1	507	1	32%
RAAPBAR031H09.g	blastn	dbESTs_Llongipalpis.fasta	AM097632 Lutzomyia longipalpis Jacobina whole fly Lutzomyia longipalpis cDNA clone NSFM-135d06, mRNA sequence	AM097632	3e-15	82	1	449	1	22%
RAAPBAR032B08.g	blastn	dbESTs_Llongipalpis.fasta	AM090531 Lutzomyia longipalpis Jacobina whole fly Lutzomyia longipalpis cDNA clone NSFM-21h03, mRNA sequence	AM090531	2e-13	76	1	517	1	32%
RAAPBAR032B11.g	blastn	dbESTs_Llongipalpis.fasta	AM096236 Lutzomyia longipalpis Jacobina whole fly Lutzomyia longipalpis cDNA clone NSFM-134b05, mRNA sequence	AM096236	0	722	1	443	1	41%
RAAPBAR032C01.g	blastn	dbESTs_Llongipalpis.fasta	AM096362 Lutzomyia longipalpis Jacobina whole fly Lutzomyia longipalpis cDNA clone NSFM-70b12, mRNA sequence	AM096362	3e-24	111	1	423	1	22%
RAAPBAR032C07.g	blastn	dbESTs_Llongipalpis.fasta	AM103940 Lutzomyia longipalpis Jacobina whole fly Lutzomyia longipalpis cDNA clone NSFM-62f08, mRNA sequence	AM103940	3e-32	137	1	233	1	31%
RAAPBAR032D04.g	blastn	dbESTs_Llongipalpis.fasta	AM100811 Lutzomyia longipalpis Jacobina whole fly Lutzomyia longipalpis cDNA clone NSFM-105f11, mRNA sequence	AM100811	0	731	1	556	1	51%
RAAPBAR032D07.g	blastn	dbESTs_Llongipalpis.fasta	AM095020 Lutzomyia longipalpis Jacobina whole fly Lutzomyia longipalpis cDNA clone NSFM-139d12, mRNA sequence	AM095020	0	674	1	409	1	50%
RAAPBAR032E09.g	blastn	dbESTs_Llongipalpis.fasta	LJGFM-P03_F09 Adult female Lutzomyia longipalpis midgut library blood fed Lutzomyia longipalpis cDNA, mRNA sequence	EW988648	1e-113	406	1	591	1	34%
RAAPBAR032F02.g	blastn	dbESTs_Llongipalpis.fasta	AM097435 Lutzomyia longipalpis Jacobina whole fly Lutzomyia longipalpis cDNA clone NSFM-61b08, mRNA sequence	AM097435	1e-147	521	1	439	1	40%
RAAPBAR032F05.g	blastn	dbESTs_Llongipalpis.fasta	LJGFIL6_B11 Adult female Lutzomyia longipalpis midgut library blood fed containing Leishmania chagasi Lutzomyia longipalpis cDNA, mRNA sequence	EW989570	0	747	1	455	1	44%
RAAPBAR032F06.g	blastn	dbESTs_Llongipalpis.fasta	LJGUS_P04_A10 Adult female Lutzomyia longipalpis midgut library sugar fed Lutzomyia longipalpis cDNA, mRNA sequence	EW996598	1e-114	408	1	307	1	38%
RAAPBAR032F09.g	blastn	dbESTs_Llongipalpis.fasta	LJGD-L3_H03 Adult female Lutzomyia longipalpis midgut library post blood meal digestion Lutzomyia longipalpis cDNA, mRNA sequence	EW991322	9e-52	202	1	313	1	41%
RAAPBAR032G05.g	blastn	dbESTs_Llongipalpis.fasta	AM106830 Lutzomyia longipalpis Jacobina whole fly Lutzomyia longipalpis cDNA clone NSFM-111e07, mRNA sequence	AM106830	0	642	1	709	2	47%
RAAPBAR032G06.g	blastn	dbESTs_Llongipalpis.fasta	AM090223 Lutzomyia longipalpis Jacobina whole fly Lutzomyia longipalpis cDNA clone NSFM-22a09, mRNA sequence	AM090223	3e-73	274	1	292	3	26%
RAAPBAR032H01.g	blastn	dbESTs_Llongipalpis.fasta	AM093538 Lutzomyia longipalpis Jacobina whole fly Lutzomyia longipalpis cDNA clone NSFM-03e06, mRNA sequence	AM093538	1e-18	92	1	175	1	32%
RAAPBAR032H07.g	blastn	dbESTs_Llongipalpis.fasta	AM101637 Lutzomyia longipalpis Jacobina whole fly Lutzomyia longipalpis cDNA clone NSFM-159e12, mRNA sequence	AM101637	0	714	1	506	1	40%
RAAPBAR033A07.g	blastn	dbESTs_Llongipalpis.fasta	LJGD-L3_H03 Adult female Lutzomyia longipalpis midgut library post blood meal digestion Lutzomyia longipalpis cDNA, mRNA sequence	EW991322	7e-54	208	1	171	1	39%
RAAPBAR033A11.g	blastn	dbESTs_Llongipalpis.fasta	AM106991 Lutzomyia longipalpis Jacobina whole fly Lutzomyia longipalpis cDNA clone NSFM-83e07, mRNA sequence	AM106991	9e-56	216	1	489	1	40%
RAAPBAR033B04.g	blastn	dbESTs_Llongipalpis.fasta	AM106956 Lutzomyia longipalpis Jacobina whole fly Lutzomyia longipalpis cDNA clone NSFM-69e08, mRNA sequence	AM106956	3e-47	186	1	202	1	24%
RAAPBAR033C11.g	blastn	dbESTs_Llongipalpis.fasta	AM106810 Lutzomyia longipalpis Jacobina whole fly Lutzomyia longipalpis cDNA clone NSFM-22c10, mRNA sequence	AM106810	1e-06	52	1	201	1	20%
RAAPBAR033C12.g	blastn	dbESTs_Llongipalpis.fasta	LJGD-L10_F06 Adult female Lutzomyia longipalpis midgut library post blood meal digestion Lutzomyia longipalpis cDNA, mRNA sequence	EW991157	1e-150	529	1	386	1	44%
RAAPBAR033D02.g	blastn	dbESTs_Llongipalpis.fasta	AM108788 Lutzomyia longipalpis Jacobina whole fly Lutzomyia longipalpis cDNA clone NSFM-111f06, mRNA sequence	AM108788	6e-88	323	1	507	1	41%
RAAPBAR033D08.g	blastn	dbESTs_Llongipalpis.fasta	AM104149 Lutzomyia longipalpis Jacobina whole fly Lutzomyia longipalpis cDNA clone NSFM-53d02, mRNA sequence	AM104149	0	638	1	437	3	42%
RAAPBAR033D09.g	blastn	dbESTs_Llongipalpis.fasta	LJGDM31_A10 Adult female Lutzomyia longipalpis midgut library post blood meal digestion Lutzomyia longipalpis cDNA, mRNA sequence	EW992712	1e-160	563	1	344	1	43%
RAAPBAR033D10.g	blastn	dbESTs_Llongipalpis.fasta	LJGFL_P01_B11 Adult female Lutzomyia longipalpis midgut library blood fed Lutzomyia longipalpis cDNA, mRNA sequence	EW987168	0	1057	1	674	2	43%
RAAPBAR033F02.g	blastn	dbESTs_Llongipalpis.fasta	LJGFIM24_F04 Adult female Lutzomyia longipalpis midgut library blood fed containing Leishmania chagasi Lutzomyia longipalpis cDNA, mRNA sequence	EW990249	0	638	1	453	1	41%
RAAPBAR033F04.g	blastn	dbESTs_Llongipalpis.fasta	LJGFM6_E01 Adult female Lutzomyia longipalpis midgut library blood fed Lutzomyia longipalpis cDNA, mRNA sequence	EW988128	1e-67	256	1	477	1	29%
RAAPBAR033F05.g	blastn	dbESTs_Llongipalpis.fasta	LJGD-L1_G11 Adult female Lutzomyia longipalpis midgut library post blood meal digestion Lutzomyia longipalpis cDNA, mRNA sequence	EW991094	1e-55	214	1	155	1	35%
RAAPBAR033F06.g	blastn	dbESTs_Llongipalpis.fasta	AM089482 Lutzomyia longipalpis Jacobina whole fly Lutzomyia longipalpis cDNA clone NSFM-93d07, mRNA sequence	AM089482	4e-92	337	1	598	4	25%
RAAPBAR033F10.g	blastn	dbESTs_Llongipalpis.fasta	LJGDM27_A10 Adult female Lutzomyia longipalpis midgut library post blood meal digestion Lutzomyia longipalpis cDNA, mRNA sequence	EW992369	1e-150	531	1	449	1	38%
RAAPBAR033G06.g	blastn	dbESTs_Llongipalpis.fasta	AM109692 Lutzomyia longipalpis Jacobina whole fly Lutzomyia longipalpis cDNA clone NSFM-19h06, mRNA sequence	AM109692	0	1074	1	636	1	46%
RAAPBAR033H01.g	blastn	dbESTs_Llongipalpis.fasta	AM101025 Lutzomyia longipalpis Jacobina whole fly Lutzomyia longipalpis cDNA clone SFM-03c08, mRNA sequence	AM101025	0	775	1	635	3	32%
RAAPBAR033H06.g	blastn	dbESTs_Llongipalpis.fasta	LJGUM-P01_B08 Adult female Lutzomyia longipalpis midgut library sugar fed Lutzomyia longipalpis cDNA, mRNA sequence	EW996013	4e-84	309	1	227	1	32%
RAAPBAR033H10.g	blastn	dbESTs_Llongipalpis.fasta	LJGFM-P01_F01 Adult female Lutzomyia longipalpis midgut library blood fed Lutzomyia longipalpis cDNA, mRNA sequence	EW988453	7e-16	84	1	399	1	23%
RAAPBAR034A01.g	blastn	dbESTs_Llongipalpis.fasta	AM100581 Lutzomyia longipalpis Jacobina whole fly Lutzomyia longipalpis cDNA clone NSFM-121a07, mRNA sequence	AM100581	1e-53	208	1	281	1	24%
RAAPBAR034A06.g	blastn	dbESTs_Llongipalpis.fasta	AM094354 Lutzomyia longipalpis Jacobina whole fly Lutzomyia longipalpis cDNA clone NSFM-162a01, mRNA sequence	AM094354	1e-08	60	1	433	2	47%
RAAPBAR034A12.g	blastn	dbESTs_Llongipalpis.fasta	AM105680 Lutzomyia longipalpis Jacobina whole fly Lutzomyia longipalpis cDNA clone NSFM-115a02, mRNA sequence	AM105680	1e-09	62	1	198	1	31%
RAAPBAR034B01.g	blastn	dbESTs_Llongipalpis.fasta	AM104061 Lutzomyia longipalpis Jacobina whole fly Lutzomyia longipalpis cDNA clone NSFM-34g08, mRNA sequence	AM104061	1e-07	56	1	334	1	41%
RAAPBAR034B02.g	blastn	dbESTs_Llongipalpis.fasta	LJGFIS31_H11 Adult female Lutzomyia longipalpis midgut library blood fed containing Leishmania chagasi Lutzomyia longipalpis cDNA, mRNA sequence	EW990858	3e-06	52	1	502	1	29%
RAAPBAR034C05.g	blastn	dbESTs_Llongipalpis.fasta	AM092176 Lutzomyia longipalpis Jacobina whole fly Lutzomyia longipalpis cDNA clone NSFM-156f02, mRNA sequence	AM092176	0	793	1	693	2	41%
RAAPBAR034C08.g	blastn	dbESTs_Llongipalpis.fasta	AM103559 Lutzomyia longipalpis Jacobina whole fly Lutzomyia longipalpis cDNA clone SFM-03b03, mRNA sequence	AM103559	2e-44	178	1	381	1	26%
RAAPBAR034D07.g	blastn	dbESTs_Llongipalpis.fasta	LJGDM31_E04 Adult female Lutzomyia longipalpis midgut library post blood meal digestion Lutzomyia longipalpis cDNA, mRNA sequence	EW992752	1e-63	242	1	449	2	42%
RAAPBAR034D08.g	blastn	dbESTs_Llongipalpis.fasta	LJGFIL8_B01 Adult female Lutzomyia longipalpis midgut library blood fed containing Leishmania chagasi Lutzomyia longipalpis cDNA, mRNA sequence	EW989714	0	710	1	482	1	46%
RAAPBAR034E06.g	blastn	dbESTs_Llongipalpis.fasta	LJGDIM29_H09 Adult female Lutzomyia longipalpis midgut library post blood meal digestion containing Leishmania chagasi Lutzomyia longipalpis cDNA, mRNA sequence	EW993720	1e-161	567	1	590	1	45%
RAAPBAR034E07.g	blastn	dbESTs_Llongipalpis.fasta	LJGU-M-7_H11 Adult female Lutzomyia longipalpis midgut library sugar fed Lutzomyia longipalpis cDNA, mRNA sequence	EW995831	0	733	1	571	4	47%
RAAPBAR034E10.g	blastn	dbESTs_Llongipalpis.fasta	LJGD-L9_A04 Adult female Lutzomyia longipalpis midgut library post blood meal digestion Lutzomyia longipalpis cDNA, mRNA sequence	EW991715	1e-129	458	1	299	1	41%
RAAPBAR034F07.g	blastn	dbESTs_Llongipalpis.fasta	LJGFM-P03_A12 Adult female Lutzomyia longipalpis midgut library blood fed Lutzomyia longipalpis cDNA, mRNA sequence	EW988592	3e-78	289	1	222	2	35%
RAAPBAR034G08.g	blastn	dbESTs_Llongipalpis.fasta	LJGU-M-6_H12 Adult female Lutzomyia longipalpis midgut library sugar fed Lutzomyia longipalpis cDNA, mRNA sequence	EW995751	1e-105	379	1	227	1	21%
RAAPBAR034H05.g	blastn	dbESTs_Llongipalpis.fasta	LJGFM7_F03 Adult female Lutzomyia longipalpis midgut library blood fed Lutzomyia longipalpis cDNA, mRNA sequence	EW988229	5e-40	163	1	216	1	31%
RAAPBAR034H12.g	blastn	dbESTs_Llongipalpis.fasta	AM094261 Lutzomyia longipalpis Jacobina whole fly Lutzomyia longipalpis cDNA clone NSFM-158e04, mRNA sequence	AM094261	1e-151	533	1	403	1	50%
