# Supplementary material for: The Transcriptome of Lutzomyia longipalpis (Diptera: Psychodidae) Male Reproductive Organs
Source: PLoS One. 2012 Apr 5;7(4):e34495. doi: 10.1371/journal.pone.0034495 (PMC3320635; doi:10.1371/journal.pone.0034495)
Supplement: Table S6 — Best tBLASTx results from the comparison between Acps/mRGP-Anopheles-Drosophila-Aedes and the cDNA library of L. longipalpis male reproductive organs. (XLS) [file pone.0034495.s006.xls]

## Sheet: Table S6
Table S6. Best tBLASTx results from the comparison between Acps/mRGP-Anopheles-Drosophila-Aedes and the cDNA library of L. longipalpis male reproductive organs.
Cluster Name	Program	Database	Accession number	E-value	Score	Query Frame	Cluster Length	Reads	GC Content
RAAPBAR005C10.g	tblastx	acps-anopheles-drosophila-aedes_fev_09.fasta	AAEL007777	2e-22	97	1	586	1	41%
RAAPBAR005E03.g	tblastx	acps-anopheles-drosophila-aedes_fev_09.fasta	AGAP007049-PA	2e-18	46	2	514	1	47%
RAAPBAR007B01.g	tblastx	acps-anopheles-drosophila-aedes_fev_09.fasta	AAEL006576	1e-12	55	1	408	1	36%
RAAPBAR008G04.g	tblastx	acps-anopheles-drosophila-aedes_fev_09.fasta	AAEL013449	1e-11	61	3	487	1	35%
RAAPBAR009H11.g	tblastx	acps-anopheles-drosophila-aedes_fev_09.fasta	AAEL014289	2e-13	40	3	616	1	46%
RAAPBAR011H02.g	tblastx	acps-anopheles-drosophila-aedes_fev_09.fasta	AAEL000641	3e-10	57	1	513	1	43%
RAAPBAR013A01.g	tblastx	acps-anopheles-drosophila-aedes_fev_09.fasta	AAEL001713	4e-15	72	2	299	1	44%
RAAPBAR013H06.g	tblastx	acps-anopheles-drosophila-aedes_fev_09.fasta	COEBE4D	5e-23	91	1	687	1	47%
RAAPBAR014D07.g	tblastx	acps-anopheles-drosophila-aedes_fev_09.fasta	AAEL005772	2e-05	41	1	459	1	45%
RAAPBAR014G02.g	tblastx	acps-anopheles-drosophila-aedes_fev_09.fasta	FBgn0039568	1e-05	41	3	539	1	40%
RAAPBAR018A04.g	tblastx	acps-anopheles-drosophila-aedes_fev_09.fasta	AAEL007063	3e-24	93	-3	505	1	44%
RAAPBAR018E11.g	tblastx	acps-anopheles-drosophila-aedes_fev_09.fasta	AAEL007063	5e-19	69	1	552	1	41%
RAAPBAR020D12.g	tblastx	acps-anopheles-drosophila-aedes_fev_09.fasta	FBgn0014002	2e-09	55	3	585	1	47%
RAAPBAR022D09.g	tblastx	acps-anopheles-drosophila-aedes_fev_09.fasta	AAEL010065	1e-09	55	2	533	1	41%
RAAPBAR022E08.g	tblastx	acps-anopheles-drosophila-aedes_fev_09.fasta	AAEL013279	2e-75	273	3	598	1	50%
RAAPBAR022F08.g	tblastx	acps-anopheles-drosophila-aedes_fev_09.fasta	AAEL011558	1e-35	133	1	731	1	50%
RAAPBAR022H02.g	tblastx	acps-anopheles-drosophila-aedes_fev_09.fasta	AAEL009239-RA	8e-18	62	2	708	2	45%
RAAPBAR023H02.g	tblastx	acps-anopheles-drosophila-aedes_fev_09.fasta	AAEL000551	6e-22	48	2	619	1	50%
RAAPBAR029B12.g	tblastx	acps-anopheles-drosophila-aedes_fev_09.fasta	FBgn0039568	1e-05	41	3	482	1	39%
RAAPBAR030E12.g	tblastx	acps-anopheles-drosophila-aedes_fev_09.fasta	AAEL006576	2e-13	43	1	642	1	43%
RAAPBAR030G04.g	tblastx	acps-anopheles-drosophila-aedes_fev_09.fasta	AAEL013279	1e-59	221	3	527	1	48%
RAAPBAR031D02.g	tblastx	acps-anopheles-drosophila-aedes_fev_09.fasta	AAEL007063	3e-37	92	2	646	1	48%
RAAPBAR033F02.g	tblastx	acps-anopheles-drosophila-aedes_fev_09.fasta	AAEL005917	4e-05	40	2	453	1	41%
